# Supplementary material for: The differentially mitochondrial proteomic dataset in human ovarian cancer relative to control tissues
Source: PubMed Central journal article supplement (PMC6123609; doi:10.1016/j.dib.2018.08.028), 2018-08-14
Supplement: mmc2.pdf [file mmc2.pdf]

**Supplementary table 1. Differentially expressed proteins between epithelial ovarian cancer mitochondria relative to controls**

| Accession No. | Protein                                                                                                     | Coverage (%) | Unique Peptides | PSMs | MW [kDa] | calc. pI | Ratio (T/N) | p value ( <i>t</i> test) |
|---------------|-------------------------------------------------------------------------------------------------------------|--------------|-----------------|------|----------|----------|-------------|--------------------------|
| P02458        | Collagen alpha-1(II) chain OS=Homo sapiens GN=COL2A1 PE=1 SV=3 - [CO2A1_HUMAN]                              | 3.03         | 3               | 3    | 141.70   | 6.9      | 0.17        | 7.01E-04                 |
| A1YBP2        | Nanospan OS=Homo sapiens GN=NSPN PE=2 SV=1 - [A1YBP2_HUMAN]                                                 | 8.08         | 1               | 1    | 10.48    | 5.8      | 0.17        | 6.84E-06                 |
| H0Y686        | SUN domain-containing protein 2 (Fragment) OS=Homo sapiens GN=SUN2 PE=1 SV=1 - [H0Y686_HUMAN]               | 7.69         | 1               | 3    | 16.60    | 10.3     | 0.17        | 2.02E-04                 |
| H0YEH2        | Pumilio homolog 1 (Fragment) OS=Homo sapiens GN=PUM1 PE=1 SV=1 - [H0YEH2_HUMAN]                             | 0.62         | 1               | 1    | 120.15   | 6.8      | 0.17        | 9.26E-04                 |
| L8B4J3        | Ubiquitin C OS=Homo sapiens GN=UbC PE=4 SV=1 - [L8B4J3_HUMAN]                                               | 68.32        | 1               | 39   | 76.95    | 7.7      | 0.18        | 3.35E-04                 |
| Q702N8        | Xin actin-binding repeat-containing protein 1 OS=Homo sapiens GN=XIRP1 PE=1 SV=1 - [XIRP1_HUMAN]            | 0.38         | 1               | 1    | 198.44   | 6.2      | 0.20        | 3.11E-04                 |
| Q96KJ9        | Cytochrome c oxidase subunit 4 isoform 2, mitochondrial OS=Homo sapiens GN=COX4I2 PE=1 SV=2 - [COX42_HUMAN] | 5.85         | 1               | 1    | 20.00    | 9.6      | 0.21        | 6.28E-04                 |
| Q8IUE6        | Histone H2A type 2-B OS=Homo sapiens GN=HIST2H2AB PE=1 SV=3 - [H2A2B_HUMAN]                                 | 23.08        | 1               | 32   | 13.99    | 10.9     | 0.22        | 5.61E-05                 |

|            |                                                                                                                               |       |    |     |        |      |      |          |
|------------|-------------------------------------------------------------------------------------------------------------------------------|-------|----|-----|--------|------|------|----------|
| Q03692     | Collagen alpha-1(X) chain OS=Homo sapiens<br>GN=COL10A1 PE=1 SV=2 - [COAA1_HUMAN]                                             | 1.91  | 1  | 1   | 66.12  | 9.7  | 0.24 | 2.71E-04 |
| D3DPH5     | Collagen, type V, alpha 2, isoform CRA_b OS=Homo sapiens<br>GN=COL5A2 PE=4 SV=1 - [D3DPH5_HUMAN]                              | 2.14  | 2  | 2   | 86.03  | 6.1  | 0.24 | 3.59E-03 |
| K7ELV1     | Mitogen-activated protein kinase 4 OS=Homo sapiens<br>GN=MAPK4 PE=1 SV=1 - [K7ELV1_HUMAN]                                     | 5.58  | 1  | 2   | 26.17  | 8.7  | 0.24 | 1.85E-03 |
| P0C0S5     | Histone H2A.Z OS=Homo sapiens GN=H2AFZ PE=1 SV=2<br>- [H2AZ_HUMAN]                                                            | 31.25 | 2  | 22  | 13.54  | 10.6 | 0.25 | 8.19E-04 |
| Q59F15     | COL4A1 protein variant (Fragment) OS=Homo sapiens<br>PE=2 SV=1 - [Q59F15_HUMAN]                                               | 5.55  | 3  | 6   | 82.93  | 8.7  | 0.26 | 2.88E-05 |
| P13591     | Neural cell adhesion molecule 1 OS=Homo sapiens<br>GN=NCAM1 PE=1 SV=3 - [NCAM1_HUMAN]                                         | 14.92 | 1  | 23  | 94.52  | 4.9  | 0.26 | 8.31E-04 |
| E7ESX4     | S-arrestin (Fragment) OS=Homo sapiens GN=SAG PE=1<br>SV=1 - [E7ESX4_HUMAN]                                                    | 7.69  | 1  | 1   | 18.67  | 6.6  | 0.27 | 1.43E-03 |
| P35555     | Fibrillin-1 OS=Homo sapiens GN=FBN1 PE=1 SV=3 -<br>[FBN1_HUMAN]                                                               | 30.02 | 67 | 200 | 312.02 | 4.9  | 0.27 | 1.12E-05 |
| P02743     | Serum amyloid P-component OS=Homo sapiens GN=APCS<br>PE=1 SV=2 - [SAMP_HUMAN]                                                 | 33.18 | 8  | 39  | 25.37  | 6.5  | 0.29 | 1.99E-04 |
| A0A087WTA8 | Collagen alpha-2(I) chain OS=Homo sapiens GN=COL1A2<br>PE=1 SV=1 - [A0A087WTA8_HUMAN]                                         | 13.27 | 15 | 55  | 129.07 | 9.0  | 0.29 | 1.84E-03 |
| B4DWC1     | cDNA FLJ51345, highly similar to Histamine N-<br>methyltransferase (EC 2.1.1.8) OS=Homo sapiens PE=2<br>SV=1 - [B4DWC1_HUMAN] | 5.59  | 1  | 1   | 18.42  | 6.8  | 0.29 | 6.83E-04 |

|            |                                                                                                                            |       |   |     |        |      |      |          |
|------------|----------------------------------------------------------------------------------------------------------------------------|-------|---|-----|--------|------|------|----------|
| Q9NT22     | EMILIN-3 OS=Homo sapiens GN=EMILIN3 PE=2 SV=2 - [EMIL3_HUMAN]                                                              | 4.83  | 3 | 3   | 82.60  | 7.7  | 0.30 | 2.83E-04 |
| P02461     | Collagen alpha-1(III) chain OS=Homo sapiens GN=COL3A1 PE=1 SV=4 - [CO3A1_HUMAN]                                            | 6.41  | 9 | 21  | 138.48 | 6.6  | 0.30 | 6.85E-04 |
| F2WW55     | Catechol-O-methyltransferase (Fragment) OS=Homo sapiens GN=COMT PE=4 SV=1 - [F2WW55_HUMAN]                                 | 29.63 | 1 | 1   | 3.05   | 6.5  | 0.30 | 1.47E-03 |
| P02452     | Collagen alpha-1(I) chain OS=Homo sapiens GN=COL1A1 PE=1 SV=5 - [CO1A1_HUMAN]                                              | 14.96 | 7 | 87  | 138.86 | 5.8  | 0.30 | 8.28E-05 |
| P50150     | Guanine nucleotide-binding protein G(I)/G(S)/G(O) subunit gamma-4 OS=Homo sapiens GN=GNG4 PE=1 SV=1 - [GBG4_HUMAN]         | 32    | 2 | 3   | 8.38   | 7.1  | 0.30 | 1.39E-04 |
| B4DE51     | cDNA FLJ53714, highly similar to Mas-related G-protein coupled receptor memberF OS=Homo sapiens PE=2 SV=1 - [B4DE51_HUMAN] | 6.98  | 2 | 2   | 34.90  | 8.3  | 0.30 | 1.17E-04 |
| A0A024R2C4 | B-cell CLL/lymphoma 2, isoform CRA_b OS=Homo sapiens GN=BCL2 PE=4 SV=1 - [A0A024R2C4_HUMAN]                                | 4.88  | 1 | 1   | 22.32  | 7.0  | 0.31 | 3.30E-05 |
| P06899     | Histone H2B type 1-J OS=Homo sapiens GN=HIST1H2BJ PE=1 SV=3 - [H2B1J_HUMAN]                                                | 57.94 | 2 | 116 | 13.90  | 10.3 | 0.31 | 9.11E-04 |
| O75937     | DnaJ homolog subfamily C member 8 OS=Homo sapiens GN=DNAJC8 PE=1 SV=2 - [DNJC8_HUMAN]                                      | 6.32  | 1 | 1   | 29.82  | 9.1  | 0.31 | 1.78E-03 |
| P02760     | Protein AMBP OS=Homo sapiens GN=AMBP PE=1 SV=1 - [AMBP_HUMAN]                                                              | 14.49 | 6 | 9   | 38.97  | 6.3  | 0.31 | 5.45E-05 |
| Q6VY07     | Phosphofurin acidic cluster sorting protein 1 OS=Homo sapiens GN=PACS1 PE=1 SV=2 - [PACS1_HUMAN]                           | 2.39  | 2 | 2   | 104.83 | 7.7  | 0.31 | 1.53E-03 |

|        |                                                                                                                                            |       |    |    |        |      |      |          |
|--------|--------------------------------------------------------------------------------------------------------------------------------------------|-------|----|----|--------|------|------|----------|
| I3L2H6 | 3 beta-hydroxysteroid dehydrogenase type 7 (Fragment)<br>OS=Homo sapiens GN=HSD3B7 PE=1 SV=1 -<br>[I3L2H6_HUMAN]                           | 6.25  | 1  | 1  | 19.21  | 7.0  | 0.31 | 8.57E-04 |
| Q8IZQ1 | WD repeat and FYVE domain-containing protein 3<br>OS=Homo sapiens GN=WDFY3 PE=1 SV=2 -<br>[WDFY3_HUMAN]                                    | 0.77  | 1  | 3  | 395.01 | 6.8  | 0.31 | 2.06E-03 |
| B2RBH2 | cDNA, FLJ95508, highly similar to Homo sapiens 5'-<br>nucleotidase, ecto (CD73) (NT5E), mRNA OS=Homo<br>sapiens PE=2 SV=1 - [B2RBH2_HUMAN] | 33.8  | 13 | 26 | 63.36  | 7.0  | 0.32 | 9.67E-04 |
| H3BU16 | Hematological and neurological-expressed 1-like protein<br>(Fragment) OS=Homo sapiens GN=HN1L PE=1 SV=1 -<br>[H3BU16_HUMAN]                | 8.38  | 1  | 1  | 17.59  | 9.1  | 0.32 | 4.71E-04 |
| B4E1T8 | cDNA FLJ51452, highly similar to Lysyl oxidase homolog 1<br>(EC1.4.3.-) OS=Homo sapiens PE=2 SV=1 -<br>[B4E1T8_HUMAN]                      | 5.28  | 2  | 2  | 48.16  | 6.5  | 0.32 | 1.76E-04 |
| L0R4T3 | Histone H2B OS=Homo sapiens GN=ABCF2 PE=3 SV=1 -<br>[L0R4T3_HUMAN]                                                                         | 44.78 | 2  | 49 | 7.30   | 8.9  | 0.32 | 2.67E-03 |
| POC842 | Putative uncharacterized protein encoded by LINC00614<br>OS=Homo sapiens GN=LINC00614 PE=5 SV=1 -<br>[CJ052_HUMAN]                         | 14.88 | 1  | 1  | 13.54  | 4.6  | 0.32 | 1.92E-03 |
| H7BYY1 | Tropomyosin 1 (Alpha), isoform CRA_m OS=Homo sapiens<br>GN=TPM1 PE=1 SV=1 - [H7BYY1_HUMAN]                                                 | 37.5  | 1  | 29 | 28.73  | 4.8  | 0.32 | 1.72E-04 |
| Q9HA11 | Histone H2A OS=Homo sapiens PE=2 SV=1 -<br>[Q9HA11_HUMAN]                                                                                  | 20.36 | 3  | 11 | 29.88  | 10.1 | 0.32 | 6.11E-04 |
| P07305 | Histone H1.0 OS=Homo sapiens GN=H1F0 PE=1 SV=3 -<br>[H10_HUMAN]                                                                            | 20.62 | 4  | 22 | 20.85  | 10.8 | 0.32 | 4.06E-04 |
| H3BTPO | Cysteine-rich secretory protein LCCL domain-containing 2<br>(Fragment) OS=Homo sapiens GN=CRISPLD2 PE=1 SV=8<br>- [H3BTPO_HUMAN]           | 9.01  | 1  | 1  | 12.76  | 5.4  | 0.32 | 3.84E-04 |

|        |                                                                                                            |       |    |    |       |      |      |          |
|--------|------------------------------------------------------------------------------------------------------------|-------|----|----|-------|------|------|----------|
| K7EN06 | GTP-binding protein Di-Ras1 (Fragment) OS=Homo sapiens GN=DIRAS1 PE=1 SV=1 - [K7EN06_HUMAN]                | 12.5  | 1  | 2  | 15.11 | 6.5  | 0.32 | 4.69E-04 |
| H0YGS3 | Microfibrillar-associated protein 5 (Fragment) OS=Homo sapiens GN=MFAP5 PE=1 SV=1 - [H0YGS3_HUMAN]         | 29.11 | 2  | 3  | 9.44  | 9.5  | 0.32 | 1.27E-03 |
| Q07507 | Dermatopontin OS=Homo sapiens GN=DPT PE=1 SV=2 - [DERM_HUMAN]                                              | 9.45  | 2  | 2  | 23.99 | 4.8  | 0.32 | 5.73E-04 |
| P05108 | Cholesterol side-chain cleavage enzyme, mitochondrial OS=Homo sapiens GN=CYP11A1 PE=1 SV=2 - [CP11A_HUMAN] | 38.58 | 18 | 69 | 60.06 | 8.8  | 0.32 | 8.26E-04 |
| P16104 | Histone H2AX OS=Homo sapiens GN=H2AFX PE=1 SV=2 - [H2AX_HUMAN]                                             | 21.68 | 1  | 35 | 15.14 | 10.7 | 0.33 | 1.15E-04 |
| C9J6H1 | Myelin basic protein (Fragment) OS=Homo sapiens GN=MBP PE=1 SV=1 - [C9J6H1_HUMAN]                          | 7.92  | 1  | 1  | 11.09 | 10.3 | 0.33 | 7.08E-03 |
| Q9NZN4 | EH domain-containing protein 2 OS=Homo sapiens GN=EHD2 PE=1 SV=2 - [EHD2_HUMAN]                            | 43.83 | 19 | 43 | 61.12 | 6.5  | 0.33 | 2.35E-04 |
| P27658 | Collagen alpha-1(VIII) chain OS=Homo sapiens GN=COL8A1 PE=1 SV=2 - [CO8A1_HUMAN]                           | 4.84  | 3  | 8  | 73.32 | 9.6  | 0.33 | 9.61E-04 |
| P07585 | Decorin OS=Homo sapiens GN=DCN PE=1 SV=1 - [PGS2_HUMAN]                                                    | 17.27 | 7  | 17 | 39.72 | 8.5  | 0.33 | 3.58E-04 |
| K7EMY9 | Cold-inducible RNA-binding protein OS=Homo sapiens GN=CIRBP PE=1 SV=1 - [K7EMY9_HUMAN]                     | 14.47 | 2  | 2  | 17.04 | 9.9  | 0.33 | 2.73E-04 |
| Q8TDB4 | Protein MGARP OS=Homo sapiens GN=MGARP PE=1 SV=1 - [HUMMR_HUMAN]                                           | 37.5  | 5  | 10 | 25.37 | 4.4  | 0.33 | 8.37E-04 |

|        |                                                                                                                   |       |    |      |       |      |      |          |
|--------|-------------------------------------------------------------------------------------------------------------------|-------|----|------|-------|------|------|----------|
| Q92522 | Histone H1x OS=Homo sapiens GN=H1FX PE=1 SV=1 - [H1X_HUMAN]                                                       | 24.41 | 5  | 11   | 22.47 | 10.8 | 0.34 | 7.07E-04 |
| P10412 | Histone H1.4 OS=Homo sapiens GN=HIST1H1E PE=1 SV=2 - [H14_HUMAN]                                                  | 30.14 | 1  | 57   | 21.85 | 11.0 | 0.34 | 2.51E-04 |
| Q6GPG7 | LPAR1 protein OS=Homo sapiens GN=LPAR1 PE=1 SV=1 - [Q6GPG7_HUMAN]                                                 | 3.76  | 1  | 1    | 39.24 | 8.5  | 0.34 | 3.55E-04 |
| P02768 | Serum albumin OS=Homo sapiens GN=ALB PE=1 SV=2 - [ALBU_HUMAN]                                                     | 80.3  | 1  | 1066 | 69.32 | 6.3  | 0.34 | 6.04E-04 |
| Q8N9M5 | Transmembrane protein 102 OS=Homo sapiens GN=TMEM102 PE=1 SV=1 - [TM102_HUMAN]                                    | 1.57  | 1  | 1    | 54.14 | 5.9  | 0.34 | 2.28E-04 |
| P51888 | Prolargin OS=Homo sapiens GN=PRELP PE=1 SV=1 - [PRELP_HUMAN]                                                      | 39.27 | 13 | 25   | 43.78 | 9.4  | 0.34 | 8.31E-04 |
| Q92629 | Delta-sarcoglycan OS=Homo sapiens GN=SGCD PE=1 SV=2 - [SGCD_HUMAN]                                                | 19.38 | 5  | 9    | 32.05 | 9.1  | 0.34 | 2.98E-04 |
| Q03252 | Lamin-B2 OS=Homo sapiens GN=LMNB2 PE=1 SV=4 - [LMNB2_HUMAN]                                                       | 32.74 | 21 | 39   | 69.91 | 5.6  | 0.34 | 6.10E-04 |
| Q9BX67 | Junctional adhesion molecule C OS=Homo sapiens GN=JAM3 PE=1 SV=1 - [JAM3_HUMAN]                                   | 10    | 3  | 5    | 35.00 | 7.6  | 0.34 | 1.04E-03 |
| B7Z6U8 | cDNA FLJ53665, highly similar to Four and a half LIM domains protein 1 OS=Homo sapiens PE=2 SV=1 - [B7Z6U8_HUMAN] | 43.85 | 10 | 20   | 29.48 | 8.3  | 0.34 | 1.12E-03 |
| P48061 | Stromal cell-derived factor 1 OS=Homo sapiens GN=CXCL12 PE=1 SV=1 - [SDF1_HUMAN]                                  | 17.2  | 2  | 4    | 10.66 | 9.9  | 0.35 | 5.10E-03 |

|        |                                                                                                                                                |       |   |     |        |      |      |          |
|--------|------------------------------------------------------------------------------------------------------------------------------------------------|-------|---|-----|--------|------|------|----------|
| Q8IYS1 | Peptidase M20 domain-containing protein 2 OS=Homo sapiens GN=PM20D2 PE=1 SV=2 - [P20D2_HUMAN]                                                  | 2.52  | 1 | 1   | 47.75  | 5.8  | 0.35 | 5.12E-04 |
| A8K2W3 | cDNA FLJ78516 OS=Homo sapiens PE=2 SV=1 - [A8K2W3_HUMAN]                                                                                       | 18.12 | 8 | 9   | 47.07  | 5.2  | 0.35 | 1.40E-03 |
| Q5CZB5 | Putative uncharacterized protein DKFZp686M0430 OS=Homo sapiens GN=DKFZp686M0430 PE=2 SV=1 - [Q5CZB5_HUMAN]                                     | 21.69 | 1 | 26  | 125.01 | 4.5  | 0.35 | 1.42E-03 |
| O00479 | High mobility group nucleosome-binding domain-containing protein 4 OS=Homo sapiens GN=HMGN4 PE=1 SV=3 - [HMGN4_HUMAN]                          | 7.78  | 1 | 1   | 9.53   | 10.5 | 0.35 | 1.21E-03 |
| B4DW52 | cDNA FLJ55253, highly similar to Actin, cytoplasmic 1 OS=Homo sapiens PE=2 SV=1 - [B4DW52_HUMAN]                                               | 69.45 | 1 | 549 | 38.61  | 5.4  | 0.36 | 5.52E-04 |
| D3DTX7 | Collagen, type I, alpha 1, isoform CRA_a OS=Homo sapiens GN=COL1A1 PE=4 SV=1 - [D3DTX7_HUMAN]                                                  | 18.53 | 2 | 61  | 84.69  | 6.2  | 0.36 | 5.47E-05 |
| P55083 | Microfibril-associated glycoprotein 4 OS=Homo sapiens GN=MFAP4 PE=1 SV=2 - [MFAP4_HUMAN]                                                       | 14.51 | 4 | 23  | 28.63  | 5.6  | 0.36 | 5.61E-04 |
| B3KRY5 | cDNA FLJ35087 fis, clone PLACE6005546, highly similar to Polymerase I and transcript release factor OS=Homo sapiens PE=2 SV=1 - [B3KRY5_HUMAN] | 22.03 | 7 | 18  | 39.02  | 6.5  | 0.36 | 8.42E-05 |
| O00168 | Phospholemman OS=Homo sapiens GN=FXVD1 PE=1 SV=2 - [PLM_HUMAN]                                                                                 | 13.04 | 1 | 2   | 10.43  | 9.1  | 0.36 | 8.86E-03 |
| P25101 | Endothelin-1 receptor OS=Homo sapiens GN=EDNRA PE=1 SV=1 - [EDNRA_HUMAN]                                                                       | 1.64  | 1 | 1   | 48.69  | 8.4  | 0.36 | 2.74E-04 |
| B4E2J2 | cDNA FLJ51755, highly similar to Glutathione S-transferase Mu 3 (EC 2.5.1.18) OS=Homo sapiens PE=2 SV=1 - [B4E2J2_HUMAN]                       | 53.68 | 1 | 26  | 16.12  | 5.2  | 0.37 | 6.56E-04 |

|            |                                                                                                                                                                   |       |    |     |        |     |      |          |
|------------|-------------------------------------------------------------------------------------------------------------------------------------------------------------------|-------|----|-----|--------|-----|------|----------|
| B3KY43     | cDNA FLJ46798 fis, clone TRACH3031660, highly similar to cAMP-dependent protein kinase type II-beta regulatory subunit OS=Homo sapiens PE=2 SV=1 - [B3KY43_HUMAN] | 38.27 | 11 | 22  | 44.84  | 5.2 | 0.37 | 1.35E-04 |
| E7ENL6     | Collagen alpha-3(VI) chain OS=Homo sapiens GN=COL6A3 PE=1 SV=2 - [E7ENL6_HUMAN]                                                                                   | 31.1  | 1  | 165 | 277.95 | 8.2 | 0.37 | 4.07E-04 |
| P21266     | Glutathione S-transferase Mu 3 OS=Homo sapiens GN=GSTM3 PE=1 SV=3 - [GSTM3_HUMAN]                                                                                 | 52.44 | 4  | 43  | 26.54  | 5.5 | 0.37 | 5.16E-04 |
| Q9UBX5     | Fibulin-5 OS=Homo sapiens GN=FBLN5 PE=1 SV=1 - [FBLN5_HUMAN]                                                                                                      | 19.42 | 8  | 15  | 50.15  | 4.7 | 0.37 | 2.40E-03 |
| P08913     | Alpha-2A adrenergic receptor OS=Homo sapiens GN=ADRA2A PE=1 SV=3 - [ADA2A_HUMAN]                                                                                  | 2.67  | 1  | 1   | 48.93  | 9.7 | 0.37 | 1.30E-03 |
| Q16344     | Protein-tyrosine phosphatase (Fragment) OS=Homo sapiens GN=BPTP-3 PE=2 SV=3 - [Q16344_HUMAN]                                                                      | 8.79  | 1  | 1   | 10.56  | 6.3 | 0.37 | 1.06E-03 |
| E7EWB4     | Dihydropyrimidinase-related protein 5 (Fragment) OS=Homo sapiens GN=DPYSL5 PE=1 SV=8 - [E7EWB4_HUMAN]                                                             | 3.7   | 1  | 1   | 20.75  | 6.4 | 0.37 | 8.07E-04 |
| Q7Z351     | Putative uncharacterized protein DKFZp686N02209 OS=Homo sapiens GN=DKFZp686N02209 PE=2 SV=1 - [Q7Z351_HUMAN]                                                      | 40.25 | 1  | 155 | 52.82  | 8.5 | 0.37 | 2.12E-03 |
| Q8NGA1     | Olfactory receptor 1M1 OS=Homo sapiens GN=OR1M1 PE=2 SV=1 - [OR1M1_HUMAN]                                                                                         | 2.24  | 1  | 8   | 34.82  | 8.9 | 0.38 | 1.28E-03 |
| A1L0S7     | TNS1 protein (Fragment) OS=Homo sapiens GN=TNS1 PE=2 SV=2 - [A1L0S7_HUMAN]                                                                                        | 9.05  | 11 | 13  | 188.92 | 7.9 | 0.38 | 5.60E-04 |
| A0A059T3A1 | NADH-ubiquinone oxidoreductase chain 2 OS=Homo sapiens GN=ND2 PE=3 SV=1 - [A0A059T3A1_HUMAN]                                                                      | 4.61  | 1  | 2   | 38.93  | 9.8 | 0.38 | 6.03E-04 |



|            |                                                                                                                                                                        |       |    |    |       |      |      |          |
|------------|------------------------------------------------------------------------------------------------------------------------------------------------------------------------|-------|----|----|-------|------|------|----------|
| Q86VY4     | Testis-specific Y-encoded-like protein 5 OS=Homo sapiens<br>GN=TSPYL5 PE=1 SV=2 - [TSYL5_HUMAN]                                                                        | 2.4   | 1  | 1  | 45.12 | 9.5  | 0.38 | 5.64E-03 |
| A5Z217     | Mutant desmin OS=Homo sapiens PE=2 SV=1 -<br>[A5Z217_HUMAN]                                                                                                            | 45.96 | 17 | 38 | 53.56 | 5.3  | 0.38 | 3.25E-04 |
| A0A024F8S6 | HLA-DRB5 protein (Fragment) OS=Homo sapiens<br>GN=HLA-DRB5 PE=3 SV=1 - [A0A024F8S6_HUMAN]                                                                              | 42.48 | 1  | 23 | 25.73 | 6.5  | 0.38 | 2.40E-04 |
| P80723     | Brain acid soluble protein 1 OS=Homo sapiens GN=BASP1<br>PE=1 SV=2 - [BASP1_HUMAN]                                                                                     | 78.41 | 12 | 22 | 22.68 | 4.6  | 0.38 | 7.48E-05 |
| Q5TEC6     | Histone H3 OS=Homo sapiens GN=HIST2H3PS2 PE=1<br>SV=1 - [Q5TEC6_HUMAN]                                                                                                 | 26.47 | 2  | 18 | 15.42 | 11.3 | 0.38 | 1.14E-02 |
| A0A096WB60 | NADH-ubiquinone oxidoreductase chain 5 OS=Homo<br>sapiens GN=ND5 PE=3 SV=1 - [A0A096WB60_HUMAN]                                                                        | 5.14  | 1  | 6  | 67.01 | 9.0  | 0.38 | 3.34E-04 |
| I3L102     | Ethanolamine-phosphate cytidyltransferase OS=Homo<br>sapiens GN=PCYT2 PE=1 SV=1 - [I3L102_HUMAN]                                                                       | 31.82 | 1  | 2  | 4.59  | 10.0 | 0.39 | 4.67E-03 |
| A0A024RAV4 | Cold shock domain protein A, isoform CRA_b OS=Homo<br>sapiens GN=CSDA PE=4 SV=1 - [A0A024RAV4_HUMAN]                                                                   | 8.58  | 1  | 3  | 31.93 | 9.7  | 0.39 | 1.90E-03 |
| B2RBF8     | cDNA, FLJ95486, highly similar to Homo sapiens<br>phospholipid scramblase 3 (PLSCR3), mRNA OS=Homo<br>sapiens PE=2 SV=1 - [B2RBF8_HUMAN]                               | 6.44  | 1  | 1  | 31.64 | 6.4  | 0.39 | 6.63E-03 |
| A0A024RCH0 | Transcription elongation factor A (SII)-like 6, isoform CRA_a<br>OS=Homo sapiens GN=TCEAL6 PE=4 SV=1 -<br>[A0A024RCH0_HUMAN]                                           | 4.92  | 1  | 1  | 20.33 | 4.8  | 0.39 | 2.20E-04 |
| B4DVP5     | cDNA FLJ60908, highly similar to Homo sapiens fibroblast<br>growth factor receptor 4 (FGFR4), transcript variant 2,<br>mRNA OS=Homo sapiens PE=2 SV=1 - [B4DVP5_HUMAN] | 14.03 | 7  | 42 | 80.40 | 6.3  | 0.39 | 1.76E-05 |

|        |                                                                                                                         |       |    |     |        |     |      |          |
|--------|-------------------------------------------------------------------------------------------------------------------------|-------|----|-----|--------|-----|------|----------|
| P08572 | Collagen alpha-2(IV) chain OS=Homo sapiens<br>GN=COL4A2 PE=1 SV=4 - [CO4A2_HUMAN]                                       | 6.43  | 7  | 18  | 167.45 | 8.7 | 0.39 | 4.18E-03 |
| Q9NQC0 | Extraneuronal monoamine transporter (EMT) (Fragment)<br>OS=Homo sapiens GN=SLC22A3 PE=4 SV=1 -<br>[Q9NQC0_HUMAN]        | 6.99  | 1  | 1   | 15.75  | 7.7 | 0.39 | 1.78E-03 |
| Q13268 | Dehydrogenase/reductase SDR family member 2,<br>mitochondrial OS=Homo sapiens GN=DHRS2 PE=1 SV=4 -<br>[DHRS2_HUMAN]     | 33.93 | 7  | 18  | 29.91  | 9.0 | 0.39 | 1.43E-03 |
| B4DH22 | cDNA FLJ59884, highly similar to Secernin-1 OS=Homo<br>sapiens PE=2 SV=1 - [B4DH22_HUMAN]                               | 5.05  | 1  | 1   | 24.78  | 4.7 | 0.39 | 3.53E-03 |
| B0YJ73 | Ras suppressor protein 1 variant 5 OS=Homo sapiens<br>GN=RSU1 PE=4 SV=1 - [B0YJ73_HUMAN]                                | 11.35 | 3  | 3   | 25.72  | 7.2 | 0.39 | 1.66E-04 |
| F5HB16 | cDNA FLJ51682, highly similar to Alcohol dehydrogenase<br>1B (EC 1.1.1.1) OS=Homo sapiens PE=2 SV=1 -<br>[F5HB16_HUMAN] | 41.99 | 15 | 53  | 38.32  | 8.0 | 0.40 | 2.01E-04 |
| P12109 | Collagen alpha-1(VI) chain OS=Homo sapiens<br>GN=COL6A1 PE=1 SV=3 - [CO6A1_HUMAN]                                       | 32.78 | 27 | 57  | 108.46 | 5.4 | 0.40 | 1.54E-03 |
| Q13813 | Spectrin alpha chain, non-erythrocytic 1 OS=Homo sapiens<br>GN=SPTAN1 PE=1 SV=3 - [SPTN1_HUMAN]                         | 41.95 | 1  | 179 | 284.36 | 5.4 | 0.40 | 5.44E-04 |
| A6NMZ7 | Collagen alpha-6(VI) chain OS=Homo sapiens<br>GN=COL6A6 PE=1 SV=2 - [CO6A6_HUMAN]                                       | 0.71  | 1  | 2   | 247.02 | 6.9 | 0.40 | 2.11E-03 |
| P35749 | Myosin-11 OS=Homo sapiens GN=MYH11 PE=1 SV=3 -<br>[MYH11_HUMAN]                                                         | 50.61 | 80 | 389 | 227.20 | 5.5 | 0.40 | 7.12E-04 |
| A8VPY0 | Collagen alpha 6 type IV (Fragment) OS=Homo sapiens<br>PE=2 SV=1 - [A8VPY0_HUMAN]                                       | 4.8   | 1  | 1   | 25.46  | 7.6 | 0.40 | 3.83E-04 |

|        |                                                                                                                         |       |    |     |        |     |      |          |
|--------|-------------------------------------------------------------------------------------------------------------------------|-------|----|-----|--------|-----|------|----------|
| B3KQX7 | cDNA FLJ33256 fis, clone ASTRO2005557, highly similar to MAJOR PRION PROTEIN OS=Homo sapiens PE=2 SV=1 - [B3KQX7_HUMAN] | 17.79 | 3  | 4   | 18.16  | 5.8 | 0.40 | 6.61E-03 |
| L8E853 | von Willebrand factor OS=Homo sapiens GN=VWF PE=4 SV=1 - [L8E853_HUMAN]                                                 | 11.42 | 2  | 37  | 298.18 | 5.5 | 0.40 | 2.98E-04 |
| P12277 | Creatine kinase B-type OS=Homo sapiens GN=CKB PE=1 SV=1 - [KCRB_HUMAN]                                                  | 29.4  | 6  | 10  | 42.62  | 5.6 | 0.40 | 7.78E-04 |
| B7Z2F7 | cDNA FLJ54655, highly similar to Heat shock 70 kDa protein 12A OS=Homo sapiens PE=2 SV=1 - [B7Z2F7_HUMAN]               | 19.76 | 8  | 17  | 66.37  | 8.3 | 0.40 | 3.09E-04 |
| E5RJF6 | Carbonic anhydrase 1 (Fragment) OS=Homo sapiens GN=CA1 PE=1 SV=1 - [E5RJF6_HUMAN]                                       | 43.68 | 4  | 15  | 9.40   | 9.6 | 0.41 | 1.28E-03 |
| Q6UWR7 | Ectonucleotide pyrophosphatase/phosphodiesterase family member 6 OS=Homo sapiens GN=ENPP6 PE=1 SV=2 - [ENPP6_HUMAN]     | 23.18 | 8  | 10  | 50.21  | 8.0 | 0.41 | 7.22E-04 |
| P02545 | Prelamin-A/C OS=Homo sapiens GN=LMNA PE=1 SV=1 - [LMNA_HUMAN]                                                           | 46.54 | 29 | 52  | 74.09  | 7.0 | 0.41 | 1.12E-03 |
| P27338 | Amine oxidase [flavin-containing] B OS=Homo sapiens GN=MAOB PE=1 SV=3 - [AOFB_HUMAN]                                    | 43.46 | 18 | 143 | 58.73  | 7.5 | 0.41 | 2.86E-04 |
| Q6UX72 | UDP-GlcNAc:betaGal beta-1,3-N-acetylglucosaminyltransferase 9 OS=Homo sapiens GN=B3GNT9 PE=2 SV=1 - [B3GN9_HUMAN]       | 3.73  | 1  | 1   | 43.72  | 9.2 | 0.41 | 3.04E-04 |
| H0YAZ3 | Vinexin (Fragment) OS=Homo sapiens GN=SORBS3 PE=1 SV=1 - [H0YAZ3_HUMAN]                                                 | 8.6   | 1  | 1   | 20.54  | 9.0 | 0.41 | 6.43E-04 |
| Q16853 | Membrane primary amine oxidase OS=Homo sapiens GN=AOC3 PE=1 SV=3 - [AOC3_HUMAN]                                         | 14.15 | 9  | 17  | 84.57  | 6.5 | 0.41 | 1.03E-03 |

|            |                                                                                                                                                                                      |       |    |     |        |      |      |          |
|------------|--------------------------------------------------------------------------------------------------------------------------------------------------------------------------------------|-------|----|-----|--------|------|------|----------|
| B7ZKQ9     | SCARB1 protein OS=Homo sapiens GN=SCARB1 PE=1 SV=1 - [B7ZKQ9_HUMAN]                                                                                                                  | 21.62 | 9  | 20  | 53.81  | 7.9  | 0.42 | 6.99E-04 |
| Q9BQJ4     | Transmembrane protein 47 OS=Homo sapiens GN=TMEM47 PE=1 SV=1 - [TMM47_HUMAN]                                                                                                         | 6.08  | 1  | 1   | 19.98  | 6.7  | 0.42 | 4.69E-03 |
| B2R8L0     | cDNA, FLJ93951, highly similar to Homo sapiens hydroxy-delta-5-steroid dehydrogenase, 3 beta- andsteroid delta-isomerase 2 (HSD3B2), mRNA OS=Homo sapiens PE=2 SV=1 - [B2R8L0_HUMAN] | 33.33 | 8  | 12  | 42.05  | 8.0  | 0.42 | 2.99E-04 |
| A0A0B4J1Z1 | Serine/arginine-rich-splicing factor 7 OS=Homo sapiens GN=SRSF7 PE=1 SV=1 - [A0A0B4J1Z1_HUMAN]                                                                                       | 21.9  | 2  | 4   | 15.75  | 9.8  | 0.42 | 7.48E-04 |
| A0A0C4DFX3 | EMILIN-1 OS=Homo sapiens GN=EMILIN1 PE=1 SV=1 - [A0A0C4DFX3_HUMAN]                                                                                                                   | 28.05 | 22 | 39  | 106.63 | 5.2  | 0.42 | 3.74E-04 |
| B3KMX6     | cDNA FLJ12864 fis, clone NT2RP2003604, highly similar to Alpha-catulin OS=Homo sapiens PE=2 SV=1 - [B3KMX6_HUMAN]                                                                    | 4.5   | 2  | 3   | 81.85  | 6.6  | 0.42 | 4.35E-03 |
| E5RH11     | Heparan-alpha-glucosaminide N-acetyltransferase OS=Homo sapiens GN=HGSNAT PE=4 SV=1 - [E5RH11_HUMAN]                                                                                 | 8.25  | 1  | 1   | 10.65  | 8.9  | 0.42 | 4.23E-03 |
| Q3MIR4     | Cell cycle control protein 50B OS=Homo sapiens GN=TMEM30B PE=1 SV=1 - [CC50B_HUMAN]                                                                                                  | 3.99  | 1  | 1   | 38.92  | 7.9  | 0.42 | 8.38E-03 |
| Q9UH97     | Hematopoietic progenitor cell antigen CD34 (Fragment) OS=Homo sapiens GN=CD34 PE=2 SV=1 - [Q9UH97_HUMAN]                                                                             | 4.15  | 1  | 2   | 20.70  | 7.2  | 0.42 | 2.14E-04 |
| A8K9G2     | cDNA FLJ76366 OS=Homo sapiens PE=2 SV=1 - [A8K9G2_HUMAN]                                                                                                                             | 18.41 | 1  | 35  | 22.05  | 4.9  | 0.42 | 3.87E-03 |
| P62805     | Histone H4 OS=Homo sapiens GN=HIST1H4A PE=1 SV=2 - [H4_HUMAN]                                                                                                                        | 51.46 | 6  | 153 | 11.36  | 11.4 | 0.43 | 3.15E-04 |

|        |                                                                                                                                   |       |   |    |        |      |      |          |
|--------|-----------------------------------------------------------------------------------------------------------------------------------|-------|---|----|--------|------|------|----------|
| Q96GP6 | Scavenger receptor class F member 2 OS=Homo sapiens<br>GN=SCARF2 PE=1 SV=4 - [SREC2_HUMAN]                                        | 1.26  | 1 | 1  | 92.42  | 8.4  | 0.43 | 7.96E-04 |
| P11511 | Aromatase OS=Homo sapiens GN=CYP19A1 PE=1 SV=3 -<br>[CP19A_HUMAN]                                                                 | 18.49 | 8 | 14 | 57.84  | 7.5  | 0.43 | 3.50E-04 |
| Q07092 | Collagen alpha-1(XVI) chain OS=Homo sapiens<br>GN=COL16A1 PE=1 SV=2 - [COGA1_HUMAN]                                               | 1.81  | 3 | 4  | 157.65 | 7.8  | 0.43 | 7.50E-04 |
| K7EP04 | Heat shock protein beta-6 OS=Homo sapiens GN=HSPB6<br>PE=1 SV=1 - [K7EP04_HUMAN]                                                  | 24.82 | 3 | 5  | 14.65  | 8.9  | 0.43 | 4.80E-03 |
| B4DJ89 | Polymerase (RNA) II (DNA directed) polypeptide E, 25kDa,<br>isoform CRA_c OS=Homo sapiens GN=POLR2E PE=2<br>SV=1 - [B4DJ89_HUMAN] | 8.55  | 1 | 1  | 13.54  | 8.4  | 0.43 | 6.77E-03 |
| O75475 | PC4 and SFRS1-interacting protein OS=Homo sapiens<br>GN=PSIP1 PE=1 SV=1 - [PSIP1_HUMAN]                                           | 1.51  | 1 | 1  | 60.07  | 9.1  | 0.43 | 1.40E-03 |
| E7ETP7 | Elastin (Fragment) OS=Homo sapiens GN=ELN PE=1 SV=1<br>- [E7ETP7_HUMAN]                                                           | 6.46  | 1 | 1  | 26.16  | 10.3 | 0.43 | 1.02E-02 |
| F8TAD1 | Pax7-forkhead fusion protein (Fragment) OS=Homo sapiens<br>PE=2 SV=1 - [F8TAD1_HUMAN]                                             | 1.98  | 1 | 1  | 44.15  | 9.3  | 0.43 | 2.30E-03 |
| P51911 | Calponin-1 OS=Homo sapiens GN=CNN1 PE=1 SV=2 -<br>[CNN1_HUMAN]                                                                    | 41.08 | 9 | 25 | 33.15  | 9.1  | 0.43 | 2.66E-06 |
| I3L2I2 | Misshapen-like kinase 1 (Fragment) OS=Homo sapiens<br>GN=MINK1 PE=1 SV=1 - [I3L2I2_HUMAN]                                         | 2.89  | 1 | 1  | 44.94  | 7.2  | 0.43 | 3.69E-05 |
| P0DJ93 | Small integral membrane protein 13 OS=Homo sapiens<br>GN=SMIM13 PE=3 SV=1 - [SIM13_HUMAN]                                         | 12.09 | 1 | 1  | 10.34  | 6.7  | 0.44 | 1.12E-03 |

|        |                                                                                                                                                            |       |    |    |        |      |      |          |
|--------|------------------------------------------------------------------------------------------------------------------------------------------------------------|-------|----|----|--------|------|------|----------|
| Q8TE73 | Dynein heavy chain 5, axonemal OS=Homo sapiens<br>GN=DNAH5 PE=1 SV=3 - [DYH5_HUMAN]                                                                        | 0.3   | 1  | 3  | 528.68 | 6.1  | 0.44 | 3.12E-03 |
| Q59FA2 | Splicing factor, arginine/serine-rich 1 (Splicing factor 2,<br>alternate splicing factor) variant (Fragment) OS=Homo<br>sapiens PE=2 SV=1 - [Q59FA2_HUMAN] | 16.74 | 4  | 5  | 25.61  | 9.0  | 0.44 | 5.40E-04 |
| B8ZZG1 | MAGUK p55 subfamily member 6 OS=Homo sapiens<br>GN=MPP6 PE=1 SV=1 - [B8ZZG1_HUMAN]                                                                         | 2.34  | 1  | 1  | 48.73  | 8.8  | 0.44 | 2.93E-03 |
| C9JD84 | Latent-transforming growth factor beta-binding protein 1<br>OS=Homo sapiens GN=LTBP1 PE=1 SV=1 -<br>[C9JD84_HUMAN]                                         | 0.67  | 1  | 2  | 146.91 | 4.9  | 0.44 | 2.78E-03 |
| P49863 | Granzyme K OS=Homo sapiens GN=GZMK PE=1 SV=1 -<br>[GRAK_HUMAN]                                                                                             | 7.2   | 1  | 1  | 28.86  | 9.4  | 0.44 | 3.53E-03 |
| P12110 | Collagen alpha-2(VI) chain OS=Homo sapiens<br>GN=COL6A2 PE=1 SV=4 - [CO6A2_HUMAN]                                                                          | 18.84 | 18 | 50 | 108.51 | 6.2  | 0.44 | 5.27E-04 |
| K7EK07 | Histone H3 (Fragment) OS=Homo sapiens GN=H3F3B<br>PE=1 SV=1 - [K7EK07_HUMAN]                                                                               | 53.03 | 4  | 34 | 14.91  | 11.3 | 0.44 | 9.51E-05 |
| P00918 | Carbonic anhydrase 2 OS=Homo sapiens GN=CA2 PE=1<br>SV=2 - [CAH2_HUMAN]                                                                                    | 30    | 6  | 14 | 29.23  | 7.4  | 0.44 | 3.08E-04 |
| P00352 | Retinal dehydrogenase 1 OS=Homo sapiens GN=ALDH1A1<br>PE=1 SV=2 - [AL1A1_HUMAN]                                                                            | 44.71 | 16 | 47 | 54.83  | 6.7  | 0.44 | 1.39E-04 |
| P08779 | Keratin, type I cytoskeletal 16 OS=Homo sapiens<br>GN=KRT16 PE=1 SV=4 - [K1C16_HUMAN]                                                                      | 21.78 | 1  | 12 | 51.24  | 5.0  | 0.44 | 3.73E-04 |
| Q53TN4 | Cytochrome b reductase 1 OS=Homo sapiens<br>GN=CYBRD1 PE=1 SV=1 - [CYBR1_HUMAN]                                                                            | 7.69  | 2  | 3  | 31.62  | 8.8  | 0.44 | 2.46E-03 |

|            |                                                                                                                                          |       |    |    |       |     |      |          |
|------------|------------------------------------------------------------------------------------------------------------------------------------------|-------|----|----|-------|-----|------|----------|
| M0R317     | Striatin-4 (Fragment) OS=Homo sapiens GN=STRN4 PE=1 SV=1 - [M0R317_HUMAN]                                                                | 5.05  | 1  | 1  | 20.98 | 6.7 | 0.45 | 7.25E-03 |
| B4DI81     | Gap junction protein OS=Homo sapiens PE=2 SV=1 - [B4DI81_HUMAN]                                                                          | 10.25 | 3  | 8  | 40.49 | 8.7 | 0.45 | 2.63E-03 |
| A0A0S2Z3V1 | EGF containing fibulin-like extracellular matrix protein 1 isoform 2 (Fragment) OS=Homo sapiens GN=EFEMP1 PE=2 SV=1 - [A0A0S2Z3V1_HUMAN] | 22.28 | 7  | 10 | 45.69 | 5.5 | 0.45 | 3.69E-04 |
| B4E397     | cDNA FLJ55140, highly similar to SPARC-like protein 1 OS=Homo sapiens PE=2 SV=1 - [B4E397_HUMAN]                                         | 6.53  | 2  | 2  | 55.48 | 4.8 | 0.45 | 8.65E-03 |
| O76062     | Delta(14)-sterol reductase OS=Homo sapiens GN=TM7SF2 PE=2 SV=3 - [ERG24_HUMAN]                                                           | 9.09  | 4  | 7  | 46.38 | 8.9 | 0.45 | 9.60E-07 |
| Q13884     | Beta-1-syntrophin OS=Homo sapiens GN=SNTB1 PE=1 SV=3 - [SNTB1_HUMAN]                                                                     | 5.39  | 1  | 3  | 58.03 | 8.6 | 0.45 | 3.56E-03 |
| Q01995     | Transgelin OS=Homo sapiens GN=TAGLN PE=1 SV=4 - [TAGL_HUMAN]                                                                             | 73.13 | 14 | 98 | 22.60 | 8.8 | 0.45 | 2.32E-04 |
| P51884     | Lumican OS=Homo sapiens GN=LUM PE=1 SV=2 - [LUM_HUMAN]                                                                                   | 27.22 | 9  | 15 | 38.40 | 6.6 | 0.45 | 1.20E-03 |
| Q9H1E3     | Nuclear ubiquitous casein and cyclin-dependent kinase substrate 1 OS=Homo sapiens GN=NUCKS1 PE=1 SV=1 - [NUCKS_HUMAN]                    | 3.7   | 1  | 3  | 27.28 | 5.1 | 0.45 | 7.70E-04 |
| Q8ND94     | LRRN4 C-terminal-like protein OS=Homo sapiens GN=LRRN4CL PE=2 SV=1 - [LRN4L_HUMAN]                                                       | 9.24  | 1  | 1  | 25.25 | 6.5 | 0.45 | 4.36E-03 |
| P84157     | Matrix-remodeling-associated protein 7 OS=Homo sapiens GN=MXRA7 PE=1 SV=1 - [MXRA7_HUMAN]                                                | 26.96 | 3  | 6  | 21.45 | 4.3 | 0.45 | 2.58E-03 |

|            |                                                                                                                                                                                                |       |    |    |        |     |      |          |
|------------|------------------------------------------------------------------------------------------------------------------------------------------------------------------------------------------------|-------|----|----|--------|-----|------|----------|
| Q9BXN1     | Asporin OS=Homo sapiens GN=ASPN PE=1 SV=2 - [ASPN_HUMAN]                                                                                                                                       | 10.53 | 4  | 9  | 43.39  | 7.1 | 0.45 | 1.91E-03 |
| Q5JZ08     | Hephaestin (Fragment) OS=Homo sapiens GN=HEPH PE=1 SV=1 - [Q5JZ08_HUMAN]                                                                                                                       | 1.36  | 1  | 1  | 91.30  | 5.9 | 0.45 | 8.44E-03 |
| P10109     | Adrenodoxin, mitochondrial OS=Homo sapiens GN=FDX1 PE=1 SV=1 - [ADX_HUMAN]                                                                                                                     | 22.83 | 5  | 9  | 19.38  | 5.8 | 0.46 | 2.50E-03 |
| P09488     | Glutathione S-transferase Mu 1 OS=Homo sapiens GN=GSTM1 PE=1 SV=3 - [GSTM1_HUMAN]                                                                                                              | 48.17 | 3  | 24 | 25.70  | 6.7 | 0.46 | 6.84E-04 |
| B3KME0     | cDNA FLJ10760 fis, clone NT2RP3004618, highly similar to Eukaryotic translation initiation factor 2C 1 OS=Homo sapiens PE=2 SV=1 - [B3KME0_HUMAN]                                              | 5.37  | 2  | 3  | 88.66  | 9.2 | 0.46 | 3.25E-05 |
| Q4ZG81     | Putative uncharacterized protein FLJ20701 (Fragment) OS=Homo sapiens GN=FLJ20701 PE=4 SV=1 - [Q4ZG81_HUMAN]                                                                                    | 8.86  | 1  | 1  | 18.03  | 6.0 | 0.46 | 1.39E-03 |
| A0A024QZE7 | Transforming growth factor beta 1 induced transcript 1, isoform CRA_a OS=Homo sapiens GN=TGFB1I1 PE=4 SV=1 - [A0A024QZE7_HUMAN]                                                                | 6.76  | 3  | 3  | 47.91  | 7.6 | 0.46 | 4.72E-04 |
| B2R815     | cDNA, FLJ93695, highly similar to Homo sapiens serpin peptidase inhibitor, clade A (alpha-1 antiproteinase, antitrypsin), member 4 (SERPINA4), mRNA OS=Homo sapiens PE=2 SV=1 - [B2R815_HUMAN] | 2.81  | 1  | 1  | 48.50  | 7.8 | 0.46 | 4.19E-03 |
| B4DWG8     | cDNA FLJ60923, highly similar to Phosphate-regulating neutral endopeptidase (EC3.4.24.-) OS=Homo sapiens PE=2 SV=1 - [B4DWG8_HUMAN]                                                            | 3.22  | 2  | 2  | 76.05  | 9.1 | 0.46 | 1.81E-03 |
| P50440     | Glycine amidinotransferase, mitochondrial OS=Homo sapiens GN=GATM PE=1 SV=1 - [GATM_HUMAN]                                                                                                     | 47.04 | 18 | 45 | 48.42  | 8.0 | 0.46 | 1.69E-03 |
| Q96RY7     | Intraflagellar transport protein 140 homolog OS=Homo sapiens GN=IFT140 PE=1 SV=1 - [IF140_HUMAN]                                                                                               | 1.3   | 2  | 2  | 165.09 | 6.0 | 0.46 | 3.55E-04 |



|        |                                                                                                                                           |       |    |    |        |     |      |          |
|--------|-------------------------------------------------------------------------------------------------------------------------------------------|-------|----|----|--------|-----|------|----------|
| Q05B42 | SARM1 protein (Fragment) OS=Homo sapiens GN=SARM1<br>PE=2 SV=1 - [Q05B42_HUMAN]                                                           | 1.78  | 1  | 1  | 67.90  | 6.5 | 0.46 | 1.07E-03 |
| O75367 | Core histone macro-H2A.1 OS=Homo sapiens GN=H2AFY<br>PE=1 SV=4 - [H2AY_HUMAN]                                                             | 17.74 | 4  | 22 | 39.59  | 9.8 | 0.47 | 2.73E-03 |
| P09455 | Retinol-binding protein 1 OS=Homo sapiens GN=RBP1<br>PE=1 SV=2 - [RET1_HUMAN]                                                             | 70.37 | 10 | 34 | 15.84  | 5.1 | 0.47 | 7.06E-04 |
| C9IY88 | 3-hydroxyanthranilate 3,4-dioxygenase (Fragment)<br>OS=Homo sapiens GN=HAAO PE=1 SV=8 -<br>[C9IY88_HUMAN]                                 | 6.25  | 1  | 1  | 20.44  | 5.2 | 0.47 | 3.94E-03 |
| P20774 | Mimecan OS=Homo sapiens GN=OGN PE=1 SV=1 -<br>[MIME_HUMAN]                                                                                | 34.56 | 10 | 30 | 33.90  | 5.6 | 0.47 | 5.42E-04 |
| P54289 | Voltage-dependent calcium channel subunit alpha-2/delta-1<br>OS=Homo sapiens GN=CACNA2D1 PE=1 SV=3 -<br>[CA2D1_HUMAN]                     | 13.96 | 13 | 19 | 124.49 | 5.3 | 0.47 | 1.26E-04 |
| Q05707 | Collagen alpha-1(XIV) chain OS=Homo sapiens<br>GN=COL14A1 PE=1 SV=3 - [COEA1_HUMAN]                                                       | 29.34 | 41 | 88 | 193.39 | 5.3 | 0.47 | 1.11E-03 |
| A7YME7 | IASPP short isoform OS=Homo sapiens GN=PPP1R13L<br>PE=2 SV=1 - [A7YME7_HUMAN]                                                             | 5.65  | 1  | 1  | 44.08  | 4.9 | 0.47 | 4.27E-03 |
| H3BRU6 | Poly(rC)-binding protein 2 (Fragment) OS=Homo sapiens<br>GN=PCBP2 PE=1 SV=1 - [H3BRU6_HUMAN]                                              | 34.55 | 1  | 13 | 31.69  | 8.4 | 0.47 | 4.23E-03 |
| A8K987 | cDNA FLJ77911, highly similar to Homo sapiens glutathione<br>S-transferase A2 (GSTA2), mRNA OS=Homo sapiens PE=2<br>SV=1 - [A8K987_HUMAN] | 23.42 | 6  | 22 | 25.66  | 9.0 | 0.47 | 5.43E-04 |
| F8VSC4 | Methionine aminopeptidase 2 (Fragment) OS=Homo<br>sapiens GN=METAP2 PE=1 SV=1 - [F8VSC4_HUMAN]                                            | 14.29 | 1  | 2  | 17.06  | 6.1 | 0.47 | 2.07E-03 |

|        |                                                                                                                                                                        |       |   |    |        |     |      |          |
|--------|------------------------------------------------------------------------------------------------------------------------------------------------------------------------|-------|---|----|--------|-----|------|----------|
| Q03135 | Caveolin-1 OS=Homo sapiens GN=CAV1 PE=1 SV=4 - [CAV1_HUMAN]                                                                                                            | 47.19 | 7 | 34 | 20.46  | 6.0 | 0.47 | 4.14E-05 |
| B3KQU6 | cDNA PSEC0207 fis, clone HEMBA1002981, highly similar to Homo sapiens nurim (nuclear envelope membrane protein) (NRM), mRNA OS=Homo sapiens PE=2 SV=1 - [B3KQU6_HUMAN] | 16.79 | 4 | 9  | 29.37  | 8.6 | 0.47 | 1.25E-04 |
| H0Y8S4 | Ubiquitin thioesterase otulin (Fragment) OS=Homo sapiens GN=OTULIN PE=1 SV=1 - [H0Y8S4_HUMAN]                                                                          | 9.09  | 1 | 1  | 7.53   | 8.4 | 0.47 | 7.13E-04 |
| O43930 | Putative serine/threonine-protein kinase PRKY OS=Homo sapiens GN=PRKY PE=5 SV=1 - [PRKY_HUMAN]                                                                         | 6.86  | 1 | 1  | 31.69  | 7.0 | 0.47 | 2.12E-05 |
| P13671 | Complement component C6 OS=Homo sapiens GN=C6 PE=1 SV=3 - [CO6_HUMAN]                                                                                                  | 4.71  | 1 | 5  | 104.72 | 6.8 | 0.47 | 1.05E-02 |
| B4DQA3 | cDNA FLJ58603, highly similar to Actin-binding LIM protein 1 OS=Homo sapiens PE=2 SV=1 - [B4DQA3_HUMAN]                                                                | 3.68  | 1 | 1  | 43.83  | 9.0 | 0.47 | 7.10E-03 |
| Q9UNW9 | RNA-binding protein Nova-2 OS=Homo sapiens GN=NOVA2 PE=1 SV=1 - [NOVA2_HUMAN]                                                                                          | 1.63  | 1 | 1  | 48.98  | 8.2 | 0.47 | 1.95E-03 |
| O75781 | Paralemmin-1 OS=Homo sapiens GN=PALM PE=1 SV=2 - [PALM_HUMAN]                                                                                                          | 4.91  | 2 | 2  | 42.05  | 5.0 | 0.48 | 2.73E-03 |
| Q5VY30 | Retinol binding protein 4, plasma, isoform CRA_b OS=Homo sapiens GN=RBP4 PE=1 SV=2 - [Q5VY30_HUMAN]                                                                    | 5.03  | 1 | 2  | 22.96  | 6.1 | 0.48 | 1.47E-04 |
| Q5JXC2 | Migration and invasion-inhibitory protein OS=Homo sapiens GN=MIIP PE=1 SV=3 - [MIIP_HUMAN]                                                                             | 3.87  | 1 | 1  | 42.80  | 8.3 | 0.48 | 6.31E-04 |
| O43705 | Platelet glycoprotein IX (Fragment) OS=Homo sapiens PE=4 SV=1 - [O43705_HUMAN]                                                                                         | 22.03 | 1 | 1  | 6.43   | 6.9 | 0.48 | 1.30E-03 |

|            |                                                                                                                  |       |    |    |       |     |      |          |
|------------|------------------------------------------------------------------------------------------------------------------|-------|----|----|-------|-----|------|----------|
| D6RDM3     | Solute carrier family 41 member 3 OS=Homo sapiens<br>GN=SLC41A3 PE=1 SV=1 - [D6RDM3_HUMAN]                       | 27.69 | 1  | 5  | 6.71  | 5.1 | 0.48 | 4.74E-03 |
| H0YEX9     | Junctional adhesion molecule B (Fragment) OS=Homo sapiens<br>GN=JAM2 PE=1 SV=1 - [H0YEX9_HUMAN]                  | 13.03 | 3  | 5  | 29.11 | 8.8 | 0.48 | 8.87E-04 |
| E9PCT3     | Caveolin OS=Homo sapiens GN=CAV2 PE=1 SV=1 -<br>[E9PCT3_HUMAN]                                                   | 15.93 | 1  | 3  | 12.94 | 5.1 | 0.48 | 1.12E-02 |
| H0Y804     | Aldo-keto reductase family 1 member C1 (Fragment)<br>OS=Homo sapiens GN=AKR1C1 PE=1 SV=1 -<br>[H0Y804_HUMAN]     | 6.05  | 2  | 2  | 28.16 | 8.8 | 0.48 | 6.06E-04 |
| K7EN70     | Protein FAM198B (Fragment) OS=Homo sapiens<br>GN=FAM198B PE=1 SV=1 - [K7EN70_HUMAN]                              | 9.09  | 2  | 3  | 21.57 | 8.0 | 0.48 | 4.36E-03 |
| P63096     | Guanine nucleotide-binding protein G(i) subunit alpha-1<br>OS=Homo sapiens GN=GNAI1 PE=1 SV=2 -<br>[GNAI1_HUMAN] | 27.4  | 1  | 67 | 40.34 | 6.0 | 0.48 | 1.71E-03 |
| F6SDV2     | Tubulointerstitial nephritis antigen-like OS=Homo sapiens<br>GN=TINAGL1 PE=1 SV=1 - [F6SDV2_HUMAN]               | 17.13 | 5  | 6  | 40.84 | 7.0 | 0.48 | 1.22E-03 |
| Q6ZR64     | HBV PreS1-transactivated protein 1 OS=Homo sapiens<br>GN=MXRA7 PE=1 SV=1 - [Q6ZR64_HUMAN]                        | 16.9  | 1  | 6  | 23.40 | 6.5 | 0.48 | 3.55E-03 |
| A0A087WTF6 | Neural cell adhesion molecule 1 OS=Homo sapiens<br>GN=NCAM1 PE=1 SV=1 - [A0A087WTF6_HUMAN]                       | 14.74 | 1  | 22 | 93.27 | 4.9 | 0.48 | 2.36E-03 |
| A0A140VK07 | Testicular secretory protein Li 7 OS=Homo sapiens PE=2<br>SV=1 - [A0A140VK07_HUMAN]                              | 32.31 | 13 | 30 | 73.86 | 6.4 | 0.48 | 1.05E-03 |
| Q9NQG1     | Protein MANBAL OS=Homo sapiens GN=MANBAL PE=1<br>SV=1 - [MANBL_HUMAN]                                            | 23.53 | 2  | 4  | 9.46  | 9.2 | 0.49 | 2.05E-03 |

|            |                                                                                                                                          |       |    |     |        |     |      |          |
|------------|------------------------------------------------------------------------------------------------------------------------------------------|-------|----|-----|--------|-----|------|----------|
| P28161     | Glutathione S-transferase Mu 2 OS=Homo sapiens<br>GN=GSTM2 PE=1 SV=2 - [GSTM2_HUMAN]                                                     | 61.47 | 8  | 31  | 25.73  | 6.4 | 0.49 | 4.40E-03 |
| P31150     | Rab GDP dissociation inhibitor alpha OS=Homo sapiens<br>GN=GDI1 PE=1 SV=2 - [GDIA_HUMAN]                                                 | 24.16 | 7  | 17  | 50.55  | 5.1 | 0.49 | 4.84E-03 |
| V9GYG9     | Apolipoprotein A-II (Fragment) OS=Homo sapiens<br>GN=APOA2 PE=1 SV=1 - [V9GYG9_HUMAN]                                                    | 41.05 | 4  | 8   | 10.64  | 6.6 | 0.49 | 3.01E-04 |
| Q8TE57     | A disintegrin and metalloproteinase with thrombospondin<br>motifs 16 OS=Homo sapiens GN=ADAMTS16 PE=2 SV=3 -<br>[ATS16_HUMAN]            | 3.92  | 3  | 4   | 136.11 | 8.6 | 0.49 | 4.02E-03 |
| Q63ZY3     | KN motif and ankyrin repeat domain-containing protein 2<br>OS=Homo sapiens GN=KANK2 PE=1 SV=1 -<br>[KANK2_HUMAN]                         | 25.03 | 16 | 17  | 91.12  | 5.6 | 0.49 | 2.09E-03 |
| A0A024R5W6 | Tropomyosin 1 (Alpha), isoform CRA_a OS=Homo sapiens<br>GN=TPM1 PE=3 SV=1 - [A0A024R5W6_HUMAN]                                           | 47.18 | 1  | 38  | 32.66  | 4.7 | 0.49 | 7.59E-04 |
| B4DLE4     | cDNA FLJ54419, highly similar to Synaptopodin-2<br>OS=Homo sapiens PE=2 SV=1 - [B4DLE4_HUMAN]                                            | 3.58  | 2  | 3   | 74.72  | 9.4 | 0.49 | 1.90E-03 |
| Q6UWY5     | Olfactomedin-like protein 1 OS=Homo sapiens<br>GN=OLFML1 PE=1 SV=2 - [OLF1_HUMAN]                                                        | 25.12 | 9  | 16  | 45.92  | 8.1 | 0.49 | 5.81E-04 |
| A0A1B0GVV3 | RILP-like protein 1 OS=Homo sapiens GN=RILPL1 PE=1<br>SV=1 - [A0A1B0GVV3_HUMAN]                                                          | 3.11  | 1  | 1   | 44.74  | 5.1 | 0.49 | 3.37E-03 |
| A0A075B6N8 | Ig gamma-3 chain C region (Fragment) OS=Homo sapiens<br>GN=IGHG3 PE=1 SV=1 - [A0A075B6N8_HUMAN]                                          | 47.21 | 5  | 78  | 41.30  | 7.9 | 0.49 | 1.96E-03 |
| A8K3K1     | cDNA FLJ78096, highly similar to Homo sapiens actin,<br>alpha, cardiac muscle (ACTC), mRNA OS=Homo sapiens<br>PE=2 SV=1 - [A8K3K1_HUMAN] | 71.62 | 1  | 307 | 42.02  | 5.4 | 0.49 | 5.14E-03 |

|        |                                                                                                                                                                  |       |   |    |        |     |      |          |
|--------|------------------------------------------------------------------------------------------------------------------------------------------------------------------|-------|---|----|--------|-----|------|----------|
| F5H5G1 | Limbic system-associated membrane protein OS=Homo sapiens GN=LSAMP PE=1 SV=2 - [F5H5G1_HUMAN]                                                                    | 3.82  | 1 | 2  | 31.72  | 5.9 | 0.49 | 2.42E-04 |
| B2R5M1 | cDNA, FLJ92527, highly similar to Homo sapiens cytochrome P450, family 17, subfamily A, polypeptide 1 (CYP17A1), mRNA OS=Homo sapiens PE=2 SV=1 - [B2R5M1_HUMAN] | 5.91  | 3 | 7  | 57.28  | 8.7 | 0.49 | 9.74E-04 |
| B3KXZ9 | cDNA FLJ46477 fis, clone THYMU3025118, highly similar to Cell surface glycoprotein MUC18 OS=Homo sapiens PE=2 SV=1 - [B3KXZ9_HUMAN]                              | 15.25 | 7 | 8  | 58.98  | 5.2 | 0.50 | 6.79E-04 |
| Q12860 | Contactin-1 OS=Homo sapiens GN=CNTN1 PE=1 SV=1 - [CNTN1_HUMAN]                                                                                                   | 4.42  | 4 | 4  | 113.25 | 5.9 | 0.50 | 1.66E-03 |
| B2R8I2 | cDNA, FLJ93914, highly similar to Homo sapiens histidine-rich glycoprotein (HRG), mRNA OS=Homo sapiens PE=2 SV=1 - [B2R8I2_HUMAN]                                | 7.43  | 4 | 5  | 59.47  | 7.4 | 0.50 | 1.63E-03 |
| Q4KMQ2 | Anoctamin-6 OS=Homo sapiens GN=ANO6 PE=1 SV=2 - [ANO6_HUMAN]                                                                                                     | 7.8   | 4 | 6  | 106.10 | 7.8 | 0.50 | 2.64E-04 |
| B1AJZ6 | Protein Wnt (Fragment) OS=Homo sapiens GN=WNT4 PE=1 SV=1 - [B1AJZ6_HUMAN]                                                                                        | 17.31 | 1 | 1  | 6.02   | 9.2 | 0.50 | 8.38E-04 |
| Q7Z3B1 | Neuronal growth regulator 1 OS=Homo sapiens GN=NEGR1 PE=1 SV=3 - [NEGR1_HUMAN]                                                                                   | 11.58 | 2 | 2  | 38.69  | 6.2 | 0.50 | 2.01E-03 |
| S6BGF5 | IgG H chain OS=Homo sapiens PE=2 SV=1 - [S6BGF5_HUMAN]                                                                                                           | 20.42 | 2 | 11 | 25.58  | 8.6 | 0.50 | 1.61E-03 |
| Q15124 | Phosphoglucomutase-like protein 5 OS=Homo sapiens GN=PGM5 PE=1 SV=2 - [PGM5_HUMAN]                                                                               | 11.29 | 5 | 5  | 62.19  | 7.2 | 0.50 | 8.55E-04 |
| J3QRI9 | Developmentally-regulated GTP-binding protein 2 OS=Homo sapiens GN=DRG2 PE=1 SV=1 - [J3QRI9_HUMAN]                                                               | 4.07  | 1 | 2  | 18.06  | 8.4 | 0.50 | 2.24E-03 |

|            |                                                                                                                                     |       |    |    |        |     |      |          |
|------------|-------------------------------------------------------------------------------------------------------------------------------------|-------|----|----|--------|-----|------|----------|
| A6NLN1     | Polypyrimidine tract binding protein 1, isoform CRA_b<br>OS=Homo sapiens GN=PTBP1 PE=1 SV=4 -<br>[A6NLN1_HUMAN]                     | 12.71 | 5  | 14 | 56.48  | 9.4 | 0.50 | 9.42E-04 |
| P60903     | Protein S100-A10 OS=Homo sapiens GN=S100A10 PE=1<br>SV=2 - [S10AA_HUMAN]                                                            | 35.05 | 4  | 19 | 11.20  | 7.4 | 0.50 | 2.03E-04 |
| A6NJJ6     | UPF0575 protein C19orf67 OS=Homo sapiens<br>GN=C19orf67 PE=3 SV=3 - [CS067_HUMAN]                                                   | 6.15  | 1  | 1  | 39.75  | 4.9 | 0.50 | 5.77E-03 |
| B4DPN0     | cDNA FLJ51265, moderately similar to Beta-2-glycoprotein<br>1 (Beta-2-glycoprotein I) OS=Homo sapiens PE=2 SV=1 -<br>[B4DPN0_HUMAN] | 40.15 | 9  | 19 | 30.32  | 7.9 | 0.50 | 3.17E-04 |
| E7ES33     | Septin-7 OS=Homo sapiens GN=SEPT7 PE=1 SV=3 -<br>[E7ES33_HUMAN]                                                                     | 30.46 | 11 | 23 | 48.69  | 8.7 | 0.50 | 2.70E-03 |
| B4E0U6     | cDNA FLJ53687, highly similar to Hsc70-interacting protein<br>OS=Homo sapiens PE=2 SV=1 - [B4E0U6_HUMAN]                            | 33.98 | 12 | 26 | 40.14  | 5.3 | 0.50 | 2.43E-04 |
| A0A120HG46 | GCT-A10 heavy chain variable region (Fragment)<br>OS=Homo sapiens PE=2 SV=1 - [A0A120HG46_HUMAN]                                    | 12.6  | 2  | 3  | 13.59  | 8.8 | 0.50 | 1.89E-03 |
| P60891     | Ribose-phosphate pyrophosphokinase 1 OS=Homo sapiens<br>GN=PRPS1 PE=1 SV=2 - [PRPS1_HUMAN]                                          | 25.79 | 2  | 15 | 34.81  | 7.0 | 0.50 | 9.47E-04 |
| P09936     | Ubiquitin carboxyl-terminal hydrolase isozyme L1 OS=Homo<br>sapiens GN=UCHL1 PE=1 SV=2 - [UCHL1_HUMAN]                              | 50.67 | 9  | 23 | 24.81  | 5.5 | 0.50 | 7.47E-05 |
| Q9Y5S1     | Transient receptor potential cation channel subfamily V<br>member 2 OS=Homo sapiens GN=TRPV2 PE=1 SV=1 -<br>[TRPV2_HUMAN]           | 1.18  | 1  | 1  | 85.93  | 5.8 | 0.50 | 2.24E-03 |
| O76024     | Wolframin OS=Homo sapiens GN=WFS1 PE=1 SV=2 -<br>[WFS1_HUMAN]                                                                       | 20.34 | 15 | 23 | 100.23 | 8.0 | 0.50 | 4.52E-04 |

|            |                                                                                                                 |       |    |    |        |      |      |          |
|------------|-----------------------------------------------------------------------------------------------------------------|-------|----|----|--------|------|------|----------|
| A0A087WWG1 | Protein phosphatase Slingshot homolog 3 (Fragment)<br>OS=Homo sapiens GN=SSH3 PE=1 SV=1 -<br>[A0A087WWG1_HUMAN] | 11.08 | 2  | 2  | 36.07  | 5.1  | 0.50 | 3.37E-03 |
| P22694     | cAMP-dependent protein kinase catalytic subunit beta<br>OS=Homo sapiens GN=PRKACB PE=1 SV=2 -<br>[KAPCB_HUMAN]  | 11.68 | 2  | 6  | 40.60  | 8.8  | 0.50 | 2.22E-03 |
| B1AHA8     | Heme oxygenase 1 (Fragment) OS=Homo sapiens<br>GN=HMOX1 PE=1 SV=1 - [B1AHA8_HUMAN]                              | 29.95 | 4  | 10 | 21.57  | 7.1  | 0.51 | 3.68E-04 |
| Q9ULT8     | E3 ubiquitin-protein ligase HECTD1 OS=Homo sapiens<br>GN=HECTD1 PE=1 SV=3 - [HECD1_HUMAN]                       | 1.19  | 2  | 3  | 289.20 | 5.4  | 0.51 | 1.01E-02 |
| Q5T7C4     | High mobility group protein B1 OS=Homo sapiens<br>GN=HMGB1 PE=1 SV=1 - [Q5T7C4_HUMAN]                           | 52.53 | 7  | 13 | 18.30  | 9.7  | 0.51 | 2.70E-03 |
| B4DKV8     | cDNA FLJ56665, highly similar to Nucleoporin Nup37<br>OS=Homo sapiens PE=2 SV=1 - [B4DKV8_HUMAN]                | 8.29  | 1  | 1  | 20.39  | 4.9  | 0.51 | 1.06E-05 |
| Q5SSJ5     | Heterochromatin protein 1-binding protein 3 OS=Homo<br>sapiens GN=HP1BP3 PE=1 SV=1 - [HP1B3_HUMAN]              | 22.97 | 11 | 15 | 61.17  | 9.7  | 0.51 | 3.18E-04 |
| Q9BUT1     | 3-hydroxybutyrate dehydrogenase type 2 OS=Homo<br>sapiens GN=BDH2 PE=1 SV=2 - [BDH2_HUMAN]                      | 17.14 | 4  | 6  | 26.71  | 7.6  | 0.51 | 1.81E-04 |
| P16403     | Histone H1.2 OS=Homo sapiens GN=HIST1H1C PE=1<br>SV=2 - [H12_HUMAN]                                             | 30.99 | 1  | 57 | 21.35  | 10.9 | 0.51 | 2.23E-03 |
| P09382     | Galectin-1 OS=Homo sapiens GN=LGALS1 PE=1 SV=2 -<br>[LEG1_HUMAN]                                                | 57.04 | 7  | 48 | 14.71  | 5.5  | 0.51 | 2.53E-04 |
| P27487     | Dipeptidyl peptidase 4 OS=Homo sapiens GN=DPP4 PE=1<br>SV=2 - [DPP4_HUMAN]                                      | 7.05  | 6  | 9  | 88.22  | 6.0  | 0.51 | 1.70E-03 |

|            |                                                                                                                                                                              |       |    |     |        |      |      |          |
|------------|------------------------------------------------------------------------------------------------------------------------------------------------------------------------------|-------|----|-----|--------|------|------|----------|
| Q5TI65     | Mitochondrial pyruvate carrier OS=Homo sapiens<br>GN=BRP44L PE=1 SV=1 - [Q5TI65_HUMAN]                                                                                       | 12.12 | 1  | 1   | 7.53   | 9.7  | 0.51 | 7.57E-04 |
| A0A087WVT9 | Nucleoside diphosphate kinase OS=Homo sapiens<br>GN=NME4 PE=1 SV=1 - [A0A087WVT9_HUMAN]                                                                                      | 11.11 | 1  | 2   | 16.77  | 10.9 | 0.51 | 3.39E-03 |
| B0I1S0     | DYNC2H1 variant protein OS=Homo sapiens PE=2 SV=1 -<br>[B0I1S0_HUMAN]                                                                                                        | 0.88  | 2  | 4   | 492.34 | 6.5  | 0.51 | 2.49E-03 |
| P08133     | Annexin A6 OS=Homo sapiens GN=ANXA6 PE=1 SV=3 -<br>[ANXA6_HUMAN]                                                                                                             | 60.62 | 1  | 152 | 75.83  | 5.6  | 0.51 | 1.28E-03 |
| P22626     | Heterogeneous nuclear ribonucleoproteins A2/B1<br>OS=Homo sapiens GN=HNRNPA2B1 PE=1 SV=2 -<br>[ROA2_HUMAN]                                                                   | 19.26 | 6  | 20  | 37.41  | 9.0  | 0.51 | 1.27E-03 |
| F5H3J7     | CUGBP Elav-like family member 1 (Fragment) OS=Homo<br>sapiens GN=CELF1 PE=1 SV=8 - [F5H3J7_HUMAN]                                                                            | 56.76 | 1  | 2   | 4.13   | 5.7  | 0.51 | 1.87E-02 |
| B2R602     | cDNA, FLJ92709, highly similar to Homo sapiens LanC<br>lantibiotic synthetase component C-like 1 (bacterial)<br>(LANCL1), mRNA OS=Homo sapiens PE=2 SV=1 -<br>[B2R602_HUMAN] | 14.04 | 4  | 6   | 45.27  | 7.9  | 0.51 | 5.96E-04 |
| E5RIR0     | Fatty acid-binding protein, adipocyte OS=Homo sapiens<br>GN=FABP4 PE=1 SV=1 - [E5RIR0_HUMAN]                                                                                 | 30.77 | 1  | 1   | 4.57   | 4.4  | 0.51 | 2.09E-02 |
| Q15746     | Myosin light chain kinase, smooth muscle OS=Homo<br>sapiens GN=MYLK PE=1 SV=4 - [MYLK_HUMAN]                                                                                 | 7.31  | 11 | 15  | 210.58 | 6.2  | 0.51 | 9.05E-04 |
| B3KX20     | cDNA FLJ44510 fis, clone UTERU3001652, highly similar to<br>Leiomodrin-1 OS=Homo sapiens PE=2 SV=1 -<br>[B3KX20_HUMAN]                                                       | 1.43  | 1  | 1   | 55.02  | 9.1  | 0.51 | 1.78E-03 |
| P11766     | Alcohol dehydrogenase class-3 OS=Homo sapiens<br>GN=ADH5 PE=1 SV=4 - [ADHX_HUMAN]                                                                                            | 30.75 | 11 | 28  | 39.70  | 7.5  | 0.52 | 6.16E-04 |



|            |                                                                                                                                                                        |       |    |     |       |      |      |          |
|------------|------------------------------------------------------------------------------------------------------------------------------------------------------------------------|-------|----|-----|-------|------|------|----------|
| P28845     | Corticosteroid 11-beta-dehydrogenase isozyme 1<br>OS=Homo sapiens GN=HSD11B1 PE=1 SV=3 -<br>[DHI1_HUMAN]                                                               | 26.71 | 7  | 17  | 32.38 | 8.6  | 0.52 | 2.22E-04 |
| A0A024RC87 | Ribonuclease/angiogenin inhibitor 1, isoform CRA_a<br>OS=Homo sapiens GN=RNH1 PE=4 SV=1 -<br>[A0A024RC87_HUMAN]                                                        | 39.91 | 14 | 24  | 49.38 | 4.8  | 0.52 | 2.11E-04 |
| Q4LEJ9     | Prostaglandin transporter (Fragment) OS=Homo sapiens<br>GN=SLC21A2 PE=4 SV=1 - [Q4LEJ9_HUMAN]                                                                          | 40.63 | 1  | 1   | 3.26  | 10.9 | 0.52 | 3.78E-03 |
| B2R941     | cDNA, FLJ94198, highly similar to Homo sapiens<br>carboxypeptidase A3 (mast cell) (CPA3), mRNA OS=Homo<br>sapiens PE=2 SV=1 - [B2R941_HUMAN]                           | 11.27 | 5  | 7   | 48.68 | 9.0  | 0.52 | 9.91E-04 |
| Q15599     | Na(+)/H(+) exchange regulatory cofactor NHE-RF2<br>OS=Homo sapiens GN=SLC9A3R2 PE=1 SV=2 -<br>[NHRF2_HUMAN]                                                            | 4.15  | 1  | 1   | 37.39 | 7.9  | 0.52 | 4.12E-05 |
| O60814     | Histone H2B type 1-K OS=Homo sapiens GN=HIST1H2BK<br>PE=1 SV=3 - [H2B1K_HUMAN]                                                                                         | 57.94 | 2  | 118 | 13.88 | 10.3 | 0.52 | 4.19E-04 |
| B4DMR3     | cDNA FLJ51896, highly similar to Glia-derived nexin<br>OS=Homo sapiens PE=2 SV=1 - [B4DMR3_HUMAN]                                                                      | 17.37 | 5  | 7   | 37.13 | 9.5  | 0.52 | 7.03E-04 |
| O75954     | Tetraspanin-9 OS=Homo sapiens GN=TSPAN9 PE=1 SV=1<br>- [TSN9_HUMAN]                                                                                                    | 4.6   | 1  | 1   | 26.76 | 7.7  | 0.52 | 3.45E-03 |
| Q05DJ8     | HTRA1 protein (Fragment) OS=Homo sapiens GN=HTRA1<br>PE=2 SV=1 - [Q05DJ8_HUMAN]                                                                                        | 5.84  | 2  | 4   | 48.01 | 9.8  | 0.52 | 2.56E-03 |
| B7Z997     | cDNA FLJ54581, highly similar to Homo sapiens sorbin and<br>SH3 domain containing 2 (SORBS2), transcript variant 1,<br>mRNA OS=Homo sapiens PE=2 SV=1 - [B7Z997_HUMAN] | 1.63  | 1  | 1   | 55.59 | 9.3  | 0.52 | 4.83E-03 |
| D6RGI3     | Septin 11, isoform CRA_b OS=Homo sapiens GN=SEPT11<br>PE=1 SV=1 - [D6RGI3_HUMAN]                                                                                       | 24.71 | 3  | 24  | 48.98 | 7.0  | 0.52 | 2.91E-03 |

|            |                                                                                                                        |       |    |     |        |     |      |          |
|------------|------------------------------------------------------------------------------------------------------------------------|-------|----|-----|--------|-----|------|----------|
| Q8TB36     | Ganglioside-induced differentiation-associated protein 1<br>OS=Homo sapiens GN=GDAP1 PE=1 SV=3 -<br>[GDAP1_HUMAN]      | 18.44 | 6  | 8   | 41.32  | 8.3 | 0.52 | 1.03E-02 |
| Q05CW7     | NAT10 protein (Fragment) OS=Homo sapiens GN=NAT10<br>PE=2 SV=1 - [Q05CW7_HUMAN]                                        | 2.17  | 1  | 1   | 62.35  | 9.3 | 0.52 | 1.27E-02 |
| A0A0C4DH07 | Latent-transforming growth factor beta-binding protein 4<br>OS=Homo sapiens GN=LTBP4 PE=1 SV=1 -<br>[A0A0C4DH07_HUMAN] | 2.71  | 3  | 3   | 169.34 | 5.3 | 0.52 | 2.48E-03 |
| H0Y8B3     | Adenosylhomocysteinase (Fragment) OS=Homo sapiens<br>GN=AHCYL2 PE=1 SV=1 - [H0Y8B3_HUMAN]                              | 16.41 | 1  | 9   | 58.08  | 8.0 | 0.52 | 4.41E-03 |
| Q02952     | A-kinase anchor protein 12 OS=Homo sapiens<br>GN=AKAP12 PE=1 SV=4 - [AKA12_HUMAN]                                      | 24.58 | 10 | 44  | 191.37 | 4.4 | 0.52 | 3.24E-03 |
| H0YE28     | Protein SELENOH (Fragment) OS=Homo sapiens<br>GN=SELENOH PE=1 SV=1 - [H0YE28_HUMAN]                                    | 9.57  | 1  | 1   | 10.43  | 8.9 | 0.52 | 1.08E-05 |
| A0A087WYF8 | PDZ and LIM domain protein 3 OS=Homo sapiens<br>GN=PDLIM3 PE=1 SV=1 - [A0A087WYF8_HUMAN]                               | 5.58  | 1  | 1   | 21.74  | 8.6 | 0.52 | 3.51E-03 |
| B4E2M1     | cDNA FLJ58478, highly similar to Glypican-6 OS=Homo<br>sapiens PE=2 SV=1 - [B4E2M1_HUMAN]                              | 7.71  | 2  | 4   | 48.53  | 6.8 | 0.53 | 3.01E-03 |
| P23946     | Chymase OS=Homo sapiens GN=CMA1 PE=1 SV=1 -<br>[CMA1_HUMAN]                                                            | 21.05 | 4  | 4   | 27.31  | 9.3 | 0.53 | 1.32E-03 |
| H3BUU9     | Cadherin-11 OS=Homo sapiens GN=CDH11 PE=1 SV=1 -<br>[H3BUU9_HUMAN]                                                     | 1.79  | 1  | 2   | 73.75  | 4.7 | 0.53 | 2.63E-03 |
| P08758     | Annexin A5 OS=Homo sapiens GN=ANXA5 PE=1 SV=2 -<br>[ANXA5_HUMAN]                                                       | 55.31 | 18 | 111 | 35.91  | 5.0 | 0.53 | 3.37E-04 |

|        |                                                                                                                         |       |    |    |        |      |      |          |
|--------|-------------------------------------------------------------------------------------------------------------------------|-------|----|----|--------|------|------|----------|
| D3DSW5 | G protein-coupled receptor 124, isoform CRA_a OS=Homo sapiens GN=GPR124 PE=4 SV=1 - [D3DSW5_HUMAN]                      | 2.45  | 2  | 2  | 139.27 | 8.5  | 0.53 | 2.71E-02 |
| Q9GZT9 | Egl nine homolog 1 OS=Homo sapiens GN=EGLN1 PE=1 SV=1 - [EGLN1_HUMAN]                                                   | 5.63  | 1  | 1  | 45.99  | 8.5  | 0.53 | 4.51E-03 |
| F5GXW1 | Dedicator of cytokinesis protein 4 OS=Homo sapiens GN=DOCK4 PE=1 SV=2 - [F5GXW1_HUMAN]                                  | 1.19  | 1  | 1  | 125.98 | 7.9  | 0.53 | 2.29E-03 |
| Q9NRN5 | Olfactomedin-like protein 3 OS=Homo sapiens GN=OLFML3 PE=2 SV=1 - [OLFML3_HUMAN]                                        | 11.08 | 4  | 7  | 45.98  | 6.6  | 0.53 | 2.11E-03 |
| Q9UDR5 | Alpha-aminoadipic semialdehyde synthase, mitochondrial OS=Homo sapiens GN=AASS PE=1 SV=1 - [AASS_HUMAN]                 | 29.81 | 20 | 37 | 102.07 | 6.6  | 0.53 | 7.82E-04 |
| Q9UBI6 | Guanine nucleotide-binding protein G(I)/G(S)/G(O) subunit gamma-12 OS=Homo sapiens GN=GNG12 PE=1 SV=3 - [GBG12_HUMAN]   | 77.78 | 6  | 13 | 8.00   | 9.0  | 0.53 | 4.63E-04 |
| Q9HA72 | Calcium homeostasis modulator protein 2 OS=Homo sapiens GN=CALHM2 PE=2 SV=1 - [CAHM2_HUMAN]                             | 7.43  | 2  | 2  | 36.15  | 7.7  | 0.53 | 2.64E-03 |
| Q9UH99 | SUN domain-containing protein 2 OS=Homo sapiens GN=SUN2 PE=1 SV=3 - [SUN2_HUMAN]                                        | 32.91 | 14 | 21 | 80.26  | 6.7  | 0.53 | 1.03E-02 |
| P62861 | 40S ribosomal protein S30 OS=Homo sapiens GN=FAU PE=1 SV=1 - [RS30_HUMAN]                                               | 16.95 | 1  | 2  | 6.64   | 12.1 | 0.53 | 3.97E-03 |
| E9PIY1 | Protein kinase C and casein kinase substrate in neurons protein 3 OS=Homo sapiens GN=PACSIN3 PE=1 SV=1 - [E9PIY1_HUMAN] | 13.75 | 4  | 5  | 37.19  | 6.9  | 0.53 | 8.53E-03 |
| K7EP07 | Tubulin-folding cofactor B (Fragment) OS=Homo sapiens GN=TBCB PE=1 SV=8 - [K7EP07_HUMAN]                                | 16.57 | 3  | 4  | 19.24  | 5.3  | 0.53 | 1.68E-02 |

|            |                                                                                                                |       |    |     |        |     |      |          |
|------------|----------------------------------------------------------------------------------------------------------------|-------|----|-----|--------|-----|------|----------|
| Q5TBR0     | Sialic acid synthase (Fragment) OS=Homo sapiens<br>GN=NANS PE=1 SV=1 - [Q5TBR0_HUMAN]                          | 15.65 | 1  | 1   | 12.39  | 5.8 | 0.53 | 3.41E-04 |
| Q9BWP8     | Collectin-11 OS=Homo sapiens GN=COLEC11 PE=1 SV=1<br>- [COL11_HUMAN]                                           | 4.06  | 1  | 1   | 28.65  | 5.4 | 0.53 | 7.65E-03 |
| O60493     | Sorting nexin-3 OS=Homo sapiens GN=SNX3 PE=1 SV=3 -<br>[SNX3_HUMAN]                                            | 22.84 | 3  | 6   | 18.75  | 8.7 | 0.53 | 2.24E-02 |
| H0Y7M8     | Histone lysine demethylase PHF8 (Fragment) OS=Homo<br>sapiens GN=PHF8 PE=1 SV=1 - [H0Y7M8_HUMAN]               | 11.19 | 1  | 1   | 15.45  | 6.7 | 0.54 | 7.12E-03 |
| A0A024R5N4 | WD repeat domain 71, isoform CRA_a OS=Homo sapiens<br>GN=WDR71 PE=4 SV=1 - [A0A024R5N4_HUMAN]                  | 2.13  | 1  | 1   | 40.41  | 6.7 | 0.54 | 8.17E-03 |
| Q4TZM4     | Hemoglobin beta chain (Fragment) OS=Homo sapiens<br>GN=HBB PE=3 SV=1 - [Q4TZM4_HUMAN]                          | 88.12 | 1  | 107 | 11.02  | 6.5 | 0.54 | 3.37E-02 |
| A0A0A0MSU4 | ATP-binding cassette sub-family A member 8 OS=Homo<br>sapiens GN=ABCA8 PE=1 SV=1 - [A0A0A0MSU4_HUMAN]          | 9.78  | 12 | 20  | 182.95 | 7.1 | 0.54 | 2.56E-05 |
| Q15019     | Septin-2 OS=Homo sapiens GN=SEPT2 PE=1 SV=1 -<br>[SEPT2_HUMAN]                                                 | 51.8  | 12 | 26  | 41.46  | 6.6 | 0.54 | 1.82E-03 |
| P58166     | Inhibin beta E chain OS=Homo sapiens GN=INHBE PE=1<br>SV=1 - [INHBE_HUMAN]                                     | 8     | 2  | 3   | 38.54  | 9.2 | 0.54 | 1.51E-02 |
| Q15417     | Calponin-3 OS=Homo sapiens GN=CNN3 PE=1 SV=1 -<br>[CNN3_HUMAN]                                                 | 31    | 6  | 11  | 36.39  | 6.0 | 0.54 | 1.16E-03 |
| A0A0S2Z4B5 | Serine/threonine-protein phosphatase (Fragment)<br>OS=Homo sapiens GN=PPP3CA PE=2 SV=1 -<br>[A0A0S2Z4B5_HUMAN] | 1.76  | 1  | 1   | 57.62  | 6.3 | 0.54 | 9.58E-04 |

|            |                                                                                                               |       |    |    |        |      |      |          |
|------------|---------------------------------------------------------------------------------------------------------------|-------|----|----|--------|------|------|----------|
| H0Y544     | Solute carrier family 23 member 2 (Fragment) OS=Homo sapiens GN=SLC23A2 PE=1 SV=1 - [H0Y544_HUMAN]            | 4.61  | 1  | 1  | 32.87  | 9.0  | 0.54 | 2.88E-03 |
| P05204     | Non-histone chromosomal protein HMG-17 OS=Homo sapiens GN=HMGN2 PE=1 SV=3 - [HMGN2_HUMAN]                     | 8.89  | 1  | 2  | 9.39   | 10.0 | 0.54 | 2.74E-03 |
| A0A0X9T0H6 | GCT-A5 heavy chain variable region (Fragment) OS=Homo sapiens PE=2 SV=1 - [A0A0X9T0H6_HUMAN]                  | 10.53 | 1  | 1  | 12.65  | 8.0  | 0.54 | 3.19E-03 |
| P67809     | Nuclease-sensitive element-binding protein 1 OS=Homo sapiens GN=YBX1 PE=1 SV=3 - [YBOX1_HUMAN]                | 20.99 | 3  | 6  | 35.90  | 9.9  | 0.54 | 4.22E-03 |
| G4XID0     | Rhesus blood group D antigen (Fragment) OS=Homo sapiens GN=RHD PE=4 SV=1 - [G4XID0_HUMAN]                     | 37.5  | 1  | 4  | 2.99   | 8.6  | 0.54 | 1.55E-03 |
| B4DVN5     | cDNA FLJ55372, highly similar to FH1/FH2 domain-containing protein OS=Homo sapiens PE=2 SV=1 - [B4DVN5_HUMAN] | 2.69  | 2  | 2  | 81.28  | 7.5  | 0.54 | 1.91E-03 |
| B7Z938     | cDNA FLJ61727, highly similar to Laminin alpha-4 chain (Fragment) OS=Homo sapiens PE=2 SV=1 - [B7Z938_HUMAN]  | 10.05 | 10 | 12 | 157.38 | 5.4  | 0.54 | 2.50E-04 |
| H0Y4R5     | Transmembrane protein 201 (Fragment) OS=Homo sapiens GN=TMEM201 PE=1 SV=1 - [H0Y4R5_HUMAN]                    | 6.88  | 3  | 4  | 59.80  | 9.7  | 0.54 | 1.22E-03 |
| A0A1B0GTR9 | Tyrosine-protein kinase (Fragment) OS=Homo sapiens GN=JAK2 PE=1 SV=1 - [A0A1B0GTR9_HUMAN]                     | 1.55  | 1  | 1  | 81.39  | 7.8  | 0.54 | 1.24E-03 |
| Q8NC56     | LEM domain-containing protein 2 OS=Homo sapiens GN=LEMD2 PE=1 SV=1 - [LEMD2_HUMAN]                            | 17.5  | 8  | 17 | 56.94  | 9.0  | 0.54 | 1.33E-03 |
| E9PHK0     | Tetranectin OS=Homo sapiens GN=CLEC3B PE=1 SV=1 - [E9PHK0_HUMAN]                                              | 20    | 3  | 3  | 17.78  | 5.0  | 0.54 | 7.45E-04 |

|        |                                                                                                                           |       |    |    |       |      |      |          |
|--------|---------------------------------------------------------------------------------------------------------------------------|-------|----|----|-------|------|------|----------|
| B8ZZF0 | Protein phosphatase 1B (Fragment) OS=Homo sapiens<br>GN=PPM1B PE=1 SV=2 - [B8ZZF0_HUMAN]                                  | 4.62  | 1  | 1  | 33.21 | 6.3  | 0.54 | 6.97E-03 |
| P62857 | 40S ribosomal protein S28 OS=Homo sapiens GN=RPS28<br>PE=1 SV=1 - [RS28_HUMAN]                                            | 46.38 | 3  | 8  | 7.84  | 10.7 | 0.54 | 5.04E-03 |
| U3KPR1 | Keratin, type II cuticular Hb6 (Fragment) OS=Homo sapiens<br>GN=KRT86 PE=1 SV=1 - [U3KPR1_HUMAN]                          | 9.79  | 1  | 8  | 15.37 | 8.5  | 0.54 | 5.75E-04 |
| Q8N395 | Putative uncharacterized protein DKFZp761N202<br>(Fragment) OS=Homo sapiens GN=DKFZp761N202 PE=2<br>SV=1 - [Q8N395_HUMAN] | 3.82  | 1  | 2  | 34.96 | 10.0 | 0.54 | 3.13E-03 |
| B4DY28 | cDNA FLJ61189, highly similar to Cysteine and glycine-rich<br>protein 1 OS=Homo sapiens PE=2 SV=1 -<br>[B4DY28_HUMAN]     | 51.87 | 8  | 16 | 20.03 | 8.5  | 0.54 | 2.36E-04 |
| J3QQN1 | Proteasome subunit beta type-10 (Fragment) OS=Homo<br>sapiens GN=PSMB10 PE=1 SV=1 - [J3QQN1_HUMAN]                        | 7.97  | 1  | 1  | 14.20 | 6.8  | 0.54 | 1.67E-03 |
| Q13418 | Integrin-linked protein kinase OS=Homo sapiens GN=ILK<br>PE=1 SV=2 - [ILK_HUMAN]                                          | 21.9  | 10 | 19 | 51.39 | 8.1  | 0.54 | 2.20E-04 |
| F8VWLO | Alpha-globin transcription factor CP2 (Fragment) OS=Homo<br>sapiens GN=TFCP2 PE=1 SV=1 - [F8VWLO_HUMAN]                   | 3.15  | 1  | 1  | 43.91 | 7.0  | 0.54 | 3.60E-03 |
| B4E278 | cDNA FLJ55571, highly similar to Sad1/unc-84 protein-like<br>1 OS=Homo sapiens PE=2 SV=1 - [B4E278_HUMAN]                 | 12.18 | 6  | 12 | 66.14 | 6.5  | 0.54 | 6.20E-06 |
| P30086 | Phosphatidylethanolamine-binding protein 1 OS=Homo<br>sapiens GN=PEBP1 PE=1 SV=3 - [PEBP1_HUMAN]                          | 71.66 | 9  | 17 | 21.04 | 7.5  | 0.55 | 3.07E-04 |
| Q5T619 | Zinc finger protein 648 OS=Homo sapiens GN=ZNF648<br>PE=2 SV=1 - [ZN648_HUMAN]                                            | 2.11  | 1  | 2  | 62.30 | 8.6  | 0.55 | 9.94E-04 |

|        |                                                                                               |       |    |     |       |     |      |          |
|--------|-----------------------------------------------------------------------------------------------|-------|----|-----|-------|-----|------|----------|
| Q56G89 | Serum albumin OS=Homo sapiens PE=2 SV=1 - [Q56G89_HUMAN]                                      | 72.58 | 1  | 919 | 69.04 | 6.2 | 0.55 | 1.08E-02 |
| Q96PD5 | N-acetylmuramoyl-L-alanine amidase OS=Homo sapiens GN=PGLYRP2 PE=1 SV=1 - [PGRP2_HUMAN]       | 6.25  | 2  | 2   | 62.18 | 7.5 | 0.55 | 7.22E-03 |
| P02649 | Apolipoprotein E OS=Homo sapiens GN=APOE PE=1 SV=1 - [APOE_HUMAN]                             | 54.89 | 17 | 29  | 36.13 | 5.7 | 0.55 | 2.73E-04 |
| Q9NVD7 | Alpha-parvin OS=Homo sapiens GN=PARVA PE=1 SV=1 - [PARVA_HUMAN]                               | 18.82 | 6  | 12  | 42.22 | 5.9 | 0.55 | 6.72E-04 |
| Q16658 | Fascin OS=Homo sapiens GN=FSCN1 PE=1 SV=3 - [FSCN1_HUMAN]                                     | 26.77 | 10 | 18  | 54.50 | 7.2 | 0.55 | 1.58E-03 |
| P01859 | Ig gamma-2 chain C region OS=Homo sapiens GN=IGHG2 PE=1 SV=2 - [IGHG2_HUMAN]                  | 45.4  | 5  | 59  | 35.88 | 7.6 | 0.55 | 9.01E-04 |
| Q5T9B9 | Endoglin (Osler-Rendu-Weber syndrome 1) OS=Homo sapiens GN=ENG PE=4 SV=1 - [Q5T9B9_HUMAN]     | 7.84  | 4  | 5   | 67.50 | 6.6 | 0.55 | 5.22E-04 |
| P19784 | Casein kinase II subunit alpha' OS=Homo sapiens GN=CSNK2A2 PE=1 SV=1 - [CSK22_HUMAN]          | 8.86  | 2  | 4   | 41.19 | 8.6 | 0.55 | 1.12E-03 |
| P55001 | Microfibrillar-associated protein 2 OS=Homo sapiens GN=MFAP2 PE=2 SV=1 - [MFAP2_HUMAN]        | 9.84  | 2  | 5   | 20.81 | 5.0 | 0.55 | 7.23E-03 |
| Q3SY61 | KCNT2 protein OS=Homo sapiens GN=KCNT2 PE=1 SV=1 - [Q3SY61_HUMAN]                             | 5.95  | 1  | 1   | 41.89 | 6.7 | 0.55 | 2.25E-03 |
| Q8N8Q8 | Mitochondrial inner membrane protein COX18 OS=Homo sapiens GN=COX18 PE=2 SV=1 - [COX18_HUMAN] | 2.7   | 1  | 1   | 37.04 | 9.8 | 0.55 | 5.41E-04 |

|            |                                                                                                                            |       |   |     |        |     |      |          |
|------------|----------------------------------------------------------------------------------------------------------------------------|-------|---|-----|--------|-----|------|----------|
| Q59EE7     | Pro-alpha-1 type V collagen variant (Fragment) OS=Homo sapiens PE=2 SV=1 - [Q59EE7_HUMAN]                                  | 1.56  | 3 | 6   | 178.41 | 5.0 | 0.55 | 5.88E-03 |
| Q96IZ0     | PRKC apoptosis WT1 regulator protein OS=Homo sapiens GN=PAWR PE=1 SV=1 - [PAWR_HUMAN]                                      | 3.82  | 1 | 1   | 36.55  | 5.4 | 0.55 | 4.98E-03 |
| A0A0D9SGF6 | Spectrin alpha chain, non-erythrocytic 1 OS=Homo sapiens GN=SPTAN1 PE=1 SV=1 - [A0A0D9SGF6_HUMAN]                          | 41.55 | 1 | 179 | 287.43 | 5.4 | 0.55 | 1.79E-02 |
| B2RAA8     | cDNA, FLJ94802 OS=Homo sapiens PE=2 SV=1 - [B2RAA8_HUMAN]                                                                  | 3.55  | 1 | 1   | 31.12  | 5.1 | 0.55 | 5.85E-03 |
| Q9H330     | Transmembrane protein 245 OS=Homo sapiens GN=TMEM245 PE=1 SV=2 - [TM245_HUMAN]                                             | 3.73  | 3 | 4   | 100.88 | 8.9 | 0.55 | 1.07E-02 |
| H0Y485     | Insulin-like growth factor-binding protein 3 (Fragment) OS=Homo sapiens GN=IGFBP3 PE=1 SV=1 - [H0Y485_HUMAN]               | 16.78 | 3 | 5   | 16.54  | 9.4 | 0.55 | 9.89E-04 |
| V9GY97     | Amyloid beta A4 precursor protein-binding family B member 1 (Fragment) OS=Homo sapiens GN=APBB1 PE=1 SV=8 - [V9GY97_HUMAN] | 7.28  | 1 | 1   | 29.12  | 5.3 | 0.56 | 1.10E-02 |
| A0A193CHQ9 | 10E8 heavy chain variable region (Fragment) OS=Homo sapiens PE=2 SV=1 - [A0A193CHQ9_HUMAN]                                 | 19.85 | 2 | 5   | 14.47  | 7.9 | 0.56 | 1.14E-03 |
| P06396     | Gelsolin OS=Homo sapiens GN=GSN PE=1 SV=1 - [GELS_HUMAN]                                                                   | 31.2  | 2 | 82  | 85.64  | 6.3 | 0.56 | 2.74E-03 |
| A1Z1Q3     | O-acetyl-ADP-ribose deacetylase MACROD2 OS=Homo sapiens GN=MACROD2 PE=1 SV=1 - [MACD2_HUMAN]                               | 2.46  | 1 | 1   | 50.02  | 4.6 | 0.56 | 4.31E-03 |
| E9PNW4     | CD59 glycoprotein OS=Homo sapiens GN=CD59 PE=1 SV=1 - [E9PNW4_HUMAN]                                                       | 27.78 | 3 | 13  | 11.98  | 5.7 | 0.56 | 8.55E-04 |



|            |                                                                                                                                                                                      |       |    |    |        |      |      |          |
|------------|--------------------------------------------------------------------------------------------------------------------------------------------------------------------------------------|-------|----|----|--------|------|------|----------|
| I7H119     | RAB2, member RAS oncogene family-like (Fragment)<br>OS=Homo sapiens GN=RGL2 PE=4 SV=1 -<br>[I7H119_HUMAN]                                                                            | 9.33  | 1  | 1  | 28.66  | 5.5  | 0.56 | 5.86E-03 |
| Q96H79     | Zinc finger CCCH-type antiviral protein 1-like OS=Homo<br>sapiens GN=ZC3HAV1L PE=1 SV=2 - [ZCCHL_HUMAN]                                                                              | 14    | 3  | 3  | 32.94  | 8.1  | 0.56 | 1.04E-02 |
| B2R7F8     | Plasminogen OS=Homo sapiens PE=2 SV=1 -<br>[B2R7F8_HUMAN]                                                                                                                            | 30    | 17 | 31 | 90.48  | 7.2  | 0.56 | 8.30E-04 |
| A8K4W5     | cDNA FLJ76813, highly similar to Homo sapiens acetyl-<br>Coenzyme A acetyltransferase 2 (acetoacetyl Coenzyme A<br>thiolase), mRNA OS=Homo sapiens PE=2 SV=1 -<br>ΓΔΡΚΛΛΛΛΛΛΛΛ HUMAN | 11.59 | 3  | 5  | 41.35  | 6.9  | 0.56 | 3.16E-03 |
| Q8N227     | cDNA FLJ36253 fis, clone THYMU2002154 OS=Homo<br>sapiens PE=2 SV=1 - [Q8N227_HUMAN]                                                                                                  | 2.64  | 1  | 1  | 55.69  | 6.0  | 0.56 | 4.74E-03 |
| P39019     | 40S ribosomal protein S19 OS=Homo sapiens GN=RPS19<br>PE=1 SV=2 - [RS19_HUMAN]                                                                                                       | 39.31 | 6  | 25 | 16.05  | 10.3 | 0.56 | 3.77E-04 |
| P36021     | Monocarboxylate transporter 8 OS=Homo sapiens<br>GN=SLC16A2 PE=1 SV=2 - [MOT8_HUMAN]                                                                                                 | 2.41  | 1  | 1  | 59.47  | 5.6  | 0.56 | 3.06E-03 |
| Q01118     | Sodium channel protein type 7 subunit alpha OS=Homo<br>sapiens GN=SCN7A PE=1 SV=2 - [SCN7A_HUMAN]                                                                                    | 3.45  | 5  | 6  | 193.37 | 8.0  | 0.56 | 1.07E-04 |
| A0A0C4DGM1 | Tryptase alpha/beta-1 (Fragment) OS=Homo sapiens<br>GN=TPSAB1 PE=1 SV=1 - [A0A0C4DGM1_HUMAN]                                                                                         | 20.66 | 4  | 6  | 23.88  | 6.4  | 0.56 | 2.05E-03 |
| A2J1N0     | Rheumatoid factor RF-IP14 (Fragment) OS=Homo sapiens<br>PE=2 SV=1 - [A2J1N0_HUMAN]                                                                                                   | 18.75 | 1  | 3  | 10.49  | 9.0  | 0.56 | 2.78E-03 |
| A0A140T8Y3 | Tenascin-X OS=Homo sapiens GN=TNXB PE=1 SV=1 -<br>[A0A140T8Y3_HUMAN]                                                                                                                 | 6.13  | 14 | 22 | 455.86 | 5.2  | 0.56 | 7.63E-04 |

|            |                                                                                                                                  |       |   |     |        |     |      |          |
|------------|----------------------------------------------------------------------------------------------------------------------------------|-------|---|-----|--------|-----|------|----------|
| Q9HAV0     | Guanine nucleotide-binding protein subunit beta-4<br>OS=Homo sapiens GN=GNB4 PE=1 SV=3 -<br>[GGB4_HUMAN]                         | 25.88 | 3 | 23  | 37.54  | 6.0 | 0.56 | 1.85E-04 |
| Q16555     | Dihydropyrimidinase-related protein 2 OS=Homo sapiens<br>GN=DPYSL2 PE=1 SV=1 - [DPYL2_HUMAN]                                     | 35.84 | 5 | 40  | 62.25  | 6.4 | 0.56 | 2.54E-03 |
| B2R960     | cDNA, FLJ94230, highly similar to Homo sapiens<br>thioredoxin-like 1 (TXNL1), mRNA OS=Homo sapiens PE=2<br>SV=1 - [B2R960_HUMAN] | 21.8  | 4 | 8   | 32.22  | 5.0 | 0.56 | 1.40E-03 |
| Q6N095     | Uncharacterized protein OS=Homo sapiens<br>GN=DKFZp686K03196 PE=1 SV=1 - [Q6N095_HUMAN]                                          | 40.21 | 1 | 156 | 52.33  | 8.6 | 0.56 | 6.32E-04 |
| D2CPK1     | Mutant mutant xeroderma pigmentosum complementation<br>group C protein (Fragment) OS=Homo sapiens PE=4 SV=1<br>- [D2CPK1_HUMAN]  | 13.29 | 1 | 1   | 15.93  | 5.2 | 0.56 | 6.86E-03 |
| A5PKY0     | EPS15L1 protein (Fragment) OS=Homo sapiens<br>GN=EPS15L1 PE=2 SV=1 - [A5PKY0_HUMAN]                                              | 2.83  | 2 | 3   | 66.31  | 5.3 | 0.56 | 1.52E-04 |
| A0A0C4DG84 | Anthrax toxin receptor 2 OS=Homo sapiens GN=ANTXR2<br>PE=1 SV=1 - [A0A0C4DG84_HUMAN]                                             | 9.39  | 2 | 2   | 26.09  | 6.8 | 0.56 | 1.86E-04 |
| B4DPZ3     | cDNA FLJ53290, highly similar to Cytoplasmic dynein 1<br>intermediate chain 2 OS=Homo sapiens PE=2 SV=1 -<br>[B4DPZ3_HUMAN]      | 12.22 | 5 | 8   | 70.41  | 5.3 | 0.56 | 1.12E-03 |
| O75084     | Frizzled-7 OS=Homo sapiens GN=FZD7 PE=1 SV=2 -<br>[FZD7_HUMAN]                                                                   | 7.32  | 3 | 7   | 63.58  | 7.8 | 0.56 | 1.36E-03 |
| I1VSB5     | Siglec-16 (Fragment) OS=Homo sapiens GN=SIGLEC16<br>PE=4 SV=1 - [I1VSB5_HUMAN]                                                   | 2.11  | 1 | 1   | 47.22  | 9.0 | 0.56 | 1.12E-03 |
| B9EGI2     | Myosin phosphatase Rho interacting protein OS=Homo<br>sapiens GN=MPRIP PE=2 SV=1 - [B9EGI2_HUMAN]                                | 2.51  | 2 | 2   | 117.97 | 6.4 | 0.56 | 2.34E-02 |

|            |                                                                                                                                                    |       |    |    |        |     |      |          |
|------------|----------------------------------------------------------------------------------------------------------------------------------------------------|-------|----|----|--------|-----|------|----------|
| Q6FG99     | RPLP1 protein OS=Homo sapiens GN=RPLP1 PE=2 SV=1 - [Q6FG99_HUMAN]                                                                                  | 44.74 | 2  | 8  | 11.56  | 4.4 | 0.56 | 1.05E-03 |
| P32189     | Glycerol kinase OS=Homo sapiens GN=GK PE=1 SV=3 - [GLPK_HUMAN]                                                                                     | 15.56 | 8  | 9  | 61.21  | 6.5 | 0.56 | 4.99E-03 |
| P02656     | Apolipoprotein C-III OS=Homo sapiens GN=APOC3 PE=1 SV=1 - [APOC3_HUMAN]                                                                            | 34.34 | 3  | 5  | 10.85  | 5.4 | 0.56 | 7.16E-04 |
| B1AP13     | Complement decay-accelerating factor OS=Homo sapiens GN=CD55 PE=1 SV=1 - [B1AP13_HUMAN]                                                            | 18.69 | 6  | 9  | 49.31  | 8.8 | 0.56 | 5.20E-04 |
| F5H364     | Protein Wnt (Fragment) OS=Homo sapiens GN=WNT5B PE=1 SV=1 - [F5H364_HUMAN]                                                                         | 7.01  | 1  | 1  | 17.33  | 8.6 | 0.56 | 8.72E-03 |
| E9PJP1     | Mth938 domain-containing protein OS=Homo sapiens GN=AAMDC PE=1 SV=1 - [E9PJP1_HUMAN]                                                               | 17.2  | 1  | 1  | 10.12  | 8.0 | 0.57 | 1.46E-04 |
| Q9UFM8     | Neuroplastin (Fragment) OS=Homo sapiens GN=DKFZp566H1924 PE=1 SV=2 - [Q9UFM8_HUMAN]                                                                | 6.17  | 2  | 2  | 34.79  | 7.7 | 0.57 | 8.75E-03 |
| B7Z6Y2     | cDNA FLJ54942, highly similar to Homo sapiens bridging integrator 1 (BIN1), transcript variant 10, mRNA OS=Homo sapiens PE=2 SV=1 - [B7Z6Y2_HUMAN] | 4.94  | 1  | 2  | 43.14  | 5.3 | 0.57 | 4.15E-03 |
| A0A024RAB6 | Heparan sulfate proteoglycan 2 (Perlecan), isoform CRA_b OS=Homo sapiens GN=HSPG2 PE=4 SV=1 - [A0A024RAB6_HUMAN]                                   | 12.91 | 41 | 64 | 463.72 | 6.5 | 0.57 | 1.21E-03 |
| C9JR67     | Epsilon-sarcoglycan OS=Homo sapiens GN=SGCE PE=1 SV=1 - [C9JR67_HUMAN]                                                                             | 14.02 | 5  | 6  | 48.72  | 6.6 | 0.57 | 8.33E-04 |
| P27816     | Microtubule-associated protein 4 OS=Homo sapiens GN=MAP4 PE=1 SV=3 - [MAP4_HUMAN]                                                                  | 8.07  | 7  | 8  | 120.93 | 5.4 | 0.57 | 4.34E-03 |

|            |                                                                                                                            |       |   |    |       |      |      |          |
|------------|----------------------------------------------------------------------------------------------------------------------------|-------|---|----|-------|------|------|----------|
| P30050     | 60S ribosomal protein L12 OS=Homo sapiens GN=RPL12<br>PE=1 SV=1 - [RL12_HUMAN]                                             | 44.85 | 5 | 12 | 17.81 | 9.4  | 0.57 | 1.62E-03 |
| P35625     | Metalloproteinase inhibitor 3 OS=Homo sapiens GN=TIMP3<br>PE=1 SV=2 - [TIMP3_HUMAN]                                        | 19.43 | 4 | 7  | 24.13 | 8.7  | 0.57 | 6.23E-04 |
| E9PHR9     | Phospholipid scramblase 4 OS=Homo sapiens<br>GN=PLSCR4 PE=1 SV=1 - [E9PHR9_HUMAN]                                          | 5.44  | 1 | 1  | 26.23 | 6.1  | 0.57 | 1.71E-02 |
| Q7Z513     | Raslp2 OS=Homo sapiens PE=2 SV=1 - [Q7Z513_HUMAN]                                                                          | 11.68 | 1 | 5  | 23.69 | 6.6  | 0.57 | 2.41E-03 |
| M4VR43     | Apolipoprotein B editing enzyme catalytic polypeptide-like<br>3F OS=Homo sapiens GN=APOBEC3F PE=2 SV=1 -<br>[M4VR43_HUMAN] | 10.46 | 2 | 4  | 45.02 | 7.2  | 0.57 | 2.71E-03 |
| P15121     | Aldose reductase OS=Homo sapiens GN=AKR1B1 PE=1<br>SV=3 - [ALDR_HUMAN]                                                     | 20.25 | 6 | 17 | 35.83 | 7.0  | 0.57 | 4.64E-03 |
| I6LM39     | Mutant methyl CpG binding protein 2 OS=Homo sapiens<br>GN=MECP2 PE=2 SV=1 - [I6LM39_HUMAN]                                 | 18.82 | 4 | 8  | 29.36 | 10.3 | 0.57 | 5.10E-04 |
| Q9NWW4     | UPF0587 protein C1orf123 OS=Homo sapiens<br>GN=C1orf123 PE=1 SV=1 - [CA123_HUMAN]                                          | 20.63 | 3 | 6  | 18.04 | 5.0  | 0.57 | 1.81E-03 |
| Q59FM5     | Guanine nucleotide-binding protein G, alpha subunit variant<br>(Fragment) OS=Homo sapiens PE=2 SV=1 -<br>[Q59FM5_HUMAN]    | 22.97 | 3 | 22 | 41.86 | 5.7  | 0.57 | 3.14E-03 |
| A0A169TED2 | Protein kinase C OS=Homo sapiens GN=PRKCA PE=2<br>SV=1 - [A0A169TED2_HUMAN]                                                | 11.61 | 6 | 10 | 76.64 | 7.5  | 0.57 | 4.56E-03 |
| B2R9V7     | Superoxide dismutase [Cu-Zn] OS=Homo sapiens PE=2<br>SV=1 - [B2R9V7_HUMAN]                                                 | 26.67 | 5 | 9  | 25.88 | 6.8  | 0.57 | 3.96E-03 |

|        |                                                                                                                                                                               |       |    |    |        |     |      |          |
|--------|-------------------------------------------------------------------------------------------------------------------------------------------------------------------------------|-------|----|----|--------|-----|------|----------|
| B3KN52 | cDNA FLJ13606 fis, clone PLACE1010579, highly similar to Homo sapiens GULP, engulfment adaptor PTB domain containing 1 (GULP1), mRNA OS=Homo sapiens PE=2 SV=1 [B3KN52_HUMAN] | 5.26  | 2  | 2  | 34.44  | 7.9 | 0.57 | 1.76E-03 |
| Q13425 | Beta-2-syntrophin OS=Homo sapiens GN=SNTB2 PE=1 SV=1 - [SNTB2_HUMAN]                                                                                                          | 25    | 11 | 19 | 57.91  | 8.8 | 0.57 | 8.50E-03 |
| Q96K76 | Ubiquitin carboxyl-terminal hydrolase 47 OS=Homo sapiens GN=USP47 PE=1 SV=3 - [UBP47_HUMAN]                                                                                   | 1.67  | 2  | 2  | 157.21 | 5.1 | 0.57 | 1.97E-02 |
| P36269 | Gamma-glutamyltransferase 5 OS=Homo sapiens GN=GGT5 PE=1 SV=2 - [GGT5_HUMAN]                                                                                                  | 13.82 | 7  | 13 | 62.22  | 7.5 | 0.57 | 1.96E-03 |
| J3QRJ1 | Secernin-2 OS=Homo sapiens GN=SCRN2 PE=1 SV=1 - [J3QRJ1_HUMAN]                                                                                                                | 14.39 | 2  | 2  | 29.57  | 6.0 | 0.57 | 1.04E-02 |
| P17612 | cAMP-dependent protein kinase catalytic subunit alpha OS=Homo sapiens GN=PRKACA PE=1 SV=2 - [KAPCA_HUMAN]                                                                     | 22.22 | 4  | 8  | 40.56  | 8.8 | 0.57 | 1.15E-03 |
| P51692 | Signal transducer and activator of transcription 5B OS=Homo sapiens GN=STAT5B PE=1 SV=2 - [STA5B_HUMAN]                                                                       | 4.45  | 1  | 3  | 89.81  | 6.0 | 0.57 | 2.10E-03 |
| Q9BS40 | Latexin OS=Homo sapiens GN=LXN PE=1 SV=2 - [LXN_HUMAN]                                                                                                                        | 16.67 | 3  | 7  | 25.73  | 5.8 | 0.57 | 3.74E-03 |
| P09619 | Platelet-derived growth factor receptor beta OS=Homo sapiens GN=PDGFRB PE=1 SV=1 - [PGFRB_HUMAN]                                                                              | 7.32  | 5  | 10 | 123.89 | 5.0 | 0.57 | 1.50E-02 |
| Q04760 | Lactoylglutathione lyase OS=Homo sapiens GN=GLO1 PE=1 SV=4 - [LGUL_HUMAN]                                                                                                     | 29.35 | 5  | 8  | 20.76  | 5.3 | 0.57 | 1.74E-04 |
| O95425 | Supervillin OS=Homo sapiens GN=SVIL PE=1 SV=2 - [SVIL_HUMAN]                                                                                                                  | 5.28  | 9  | 13 | 247.59 | 7.0 | 0.57 | 1.38E-03 |

|            |                                                                                                                                              |       |    |    |       |     |      |          |
|------------|----------------------------------------------------------------------------------------------------------------------------------------------|-------|----|----|-------|-----|------|----------|
| Q2NLD4     | PURA protein (Fragment) OS=Homo sapiens GN=PURA PE=2 SV=1 - [Q2NLD4_HUMAN]                                                                   | 24.21 | 5  | 10 | 32.00 | 7.0 | 0.57 | 9.17E-04 |
| M0QZP8     | Immunity-related GTPase family Q protein (Fragment) OS=Homo sapiens GN=IRGQ PE=1 SV=1 - [M0QZP8_HUMAN]                                       | 10.29 | 1  | 1  | 13.49 | 4.5 | 0.58 | 1.22E-03 |
| P35052     | Glypican-1 OS=Homo sapiens GN=GPC1 PE=1 SV=2 - [GPC1_HUMAN]                                                                                  | 15.05 | 6  | 7  | 61.64 | 7.3 | 0.58 | 6.03E-03 |
| Q59F44     | Cytochrome b-5 isoform 1 variant (Fragment) OS=Homo sapiens PE=2 SV=1 - [Q59F44_HUMAN]                                                       | 50    | 5  | 20 | 14.56 | 5.7 | 0.58 | 4.80E-05 |
| Q53QV1     | Putative uncharacterized protein DTNB (Fragment) OS=Homo sapiens GN=DTNB PE=4 SV=1 - [Q53QV1_HUMAN]                                          | 20    | 1  | 6  | 19.26 | 6.1 | 0.58 | 6.00E-04 |
| P17655     | Calpain-2 catalytic subunit OS=Homo sapiens GN=CAPN2 PE=1 SV=6 - [CAN2_HUMAN]                                                                | 15.43 | 7  | 13 | 79.94 | 5.0 | 0.58 | 2.52E-03 |
| Q59FC9     | Enigma homolog (Fragment) OS=Homo sapiens PE=2 SV=1 - [Q59FC9_HUMAN]                                                                         | 12.61 | 1  | 6  | 48.93 | 7.9 | 0.58 | 1.03E-03 |
| A0A024R035 | Complement component 9, isoform CRA_a OS=Homo sapiens GN=C9 PE=4 SV=1 - [A0A024R035_HUMAN]                                                   | 18.78 | 9  | 24 | 63.16 | 5.5 | 0.58 | 1.36E-03 |
| A0A087WZK9 | Eukaryotic translation initiation factor 3 subunit H OS=Homo sapiens GN=EIF3H PE=1 SV=1 - [A0A087WZK9_HUMAN]                                 | 22.92 | 6  | 9  | 39.56 | 6.4 | 0.58 | 3.64E-03 |
| F8WFC3     | Regulator of microtubule dynamics protein 2 OS=Homo sapiens GN=RMDN2 PE=1 SV=1 - [F8WFC3_HUMAN]                                              | 11.88 | 2  | 5  | 18.15 | 6.2 | 0.58 | 6.18E-03 |
| B4DKX4     | cDNA FLJ58014, highly similar to Homo sapiens programmed cell death 4, transcript variant 1, mRNA OS=Homo sapiens PE=2 SV=1 - [B4DKX4_HUMAN] | 28.79 | 10 | 13 | 50.20 | 5.5 | 0.58 | 1.69E-03 |

|            |                                                                                                                           |       |    |      |        |     |      |          |
|------------|---------------------------------------------------------------------------------------------------------------------------|-------|----|------|--------|-----|------|----------|
| Q01082     | Spectrin beta chain, non-erythrocytic 1 OS=Homo sapiens<br>GN=SPTBN1 PE=1 SV=2 - [SPTB2_HUMAN]                            | 38.92 | 69 | 158  | 274.44 | 5.6 | 0.58 | 4.13E-04 |
| Q53FL4     | Adducin 3 isoform a variant (Fragment) OS=Homo sapiens<br>PE=2 SV=1 - [Q53FL4_HUMAN]                                      | 5.4   | 3  | 6    | 74.43  | 6.5 | 0.58 | 4.94E-04 |
| F6KPG5     | Albumin (Fragment) OS=Homo sapiens PE=2 SV=1 -<br>[F6KPG5_HUMAN]                                                          | 83.59 | 1  | 1029 | 66.49  | 6.0 | 0.58 | 4.57E-03 |
| A0A087WYF1 | Laminin subunit alpha-2 OS=Homo sapiens GN=LAMA2<br>PE=1 SV=1 - [A0A087WYF1_HUMAN]                                        | 3.85  | 10 | 12   | 343.20 | 6.4 | 0.58 | 3.10E-03 |
| B2R932     | cDNA, FLJ94187, highly similar to Homo sapiens CD99<br>antigen (CD99), mRNA OS=Homo sapiens PE=2 SV=1 -<br>[B2R932_HUMAN] | 18.38 | 3  | 10   | 18.94  | 4.8 | 0.58 | 2.77E-03 |
| B4DEY6     | LIM and cysteine-rich domains protein 1 OS=Homo sapiens<br>GN=LMCD1 PE=1 SV=1 - [B4DEY6_HUMAN]                            | 25.3  | 5  | 7    | 28.49  | 5.9 | 0.58 | 9.21E-05 |
| F8W150     | Ankyrin repeat domain-containing protein 13A (Fragment)<br>OS=Homo sapiens GN=ANKRD13A PE=1 SV=1 -<br>[F8W150_HUMAN]      | 14.46 | 1  | 1    | 9.37   | 6.8 | 0.58 | 2.39E-03 |
| P16157     | Ankyrin-1 OS=Homo sapiens GN=ANK1 PE=1 SV=3 -<br>[ANK1_HUMAN]                                                             | 14.14 | 19 | 44   | 206.14 | 6.0 | 0.58 | 2.37E-04 |
| Q66K74     | Microtubule-associated protein 1S OS=Homo sapiens<br>GN=MAP1S PE=1 SV=2 - [MAP1S_HUMAN]                                   | 7.55  | 6  | 9    | 112.14 | 7.3 | 0.58 | 1.89E-03 |
| H0YMA2     | Tropomodulin-2 (Fragment) OS=Homo sapiens GN=TMOD2<br>PE=1 SV=1 - [H0YMA2_HUMAN]                                          | 12.73 | 2  | 7    | 12.38  | 9.4 | 0.59 | 7.44E-04 |
| P46439     | Glutathione S-transferase Mu 5 OS=Homo sapiens<br>GN=GSTM5 PE=1 SV=3 - [GSTM5_HUMAN]                                      | 36.7  | 2  | 25   | 25.66  | 7.4 | 0.59 | 4.01E-04 |

|            |                                                                                                                                                    |       |    |    |        |     |      |          |
|------------|----------------------------------------------------------------------------------------------------------------------------------------------------|-------|----|----|--------|-----|------|----------|
| Q5VU21     | PAI-1 mRNA-binding protein variant OS=Homo sapiens PE=2 SV=1 - [Q5VU21_HUMAN]                                                                      | 9.3   | 3  | 6  | 42.40  | 8.4 | 0.59 | 1.91E-03 |
| B4DKV4     | cDNA FLJ60647, highly similar to Keratin, type II cytoskeletal 6B OS=Homo sapiens PE=2 SV=1 - [B4DKV4_HUMAN]                                       | 17.87 | 1  | 21 | 55.70  | 8.4 | 0.59 | 1.16E-02 |
| Q93097     | Protein Wnt-2b OS=Homo sapiens GN=WNT2B PE=1 SV=2 - [WNT2B_HUMAN]                                                                                  | 9.72  | 3  | 6  | 43.74  | 9.0 | 0.59 | 4.55E-04 |
| Q8WY78     | Chromosome 20 open reading frame 161, isoform CRA_a OS=Homo sapiens GN=C20orf161 PE=2 SV=1 - [Q8WY78_HUMAN]                                        | 8.15  | 1  | 1  | 20.60  | 8.2 | 0.59 | 5.60E-03 |
| P02766     | Transthyretin OS=Homo sapiens GN=TTR PE=1 SV=1 - [TTHY_HUMAN]                                                                                      | 48.3  | 4  | 7  | 15.88  | 5.8 | 0.59 | 3.60E-03 |
| E7EV99     | Alpha-adducin OS=Homo sapiens GN=ADD1 PE=1 SV=1 - [E7EV99_HUMAN]                                                                                   | 12.82 | 6  | 6  | 70.01  | 6.5 | 0.59 | 9.21E-04 |
| A0A024RB48 | Tensin like C1 domain containing phosphatase (Tensin 2), isoform CRA_a OS=Homo sapiens GN=TENC1 PE=4 SV=1 - [A0A024RB48_HUMAN]                     | 6.61  | 4  | 7  | 138.74 | 7.4 | 0.59 | 2.09E-03 |
| E9PRU1     | EGF-containing fibulin-like extracellular matrix protein 2 OS=Homo sapiens GN=EFEMP2 PE=1 SV=1 - [E9PRU1_HUMAN]                                    | 4.59  | 2  | 2  | 48.16  | 5.0 | 0.59 | 2.89E-03 |
| A0A0A0MR85 | Glutathione S-transferase Mu 4 OS=Homo sapiens GN=GSTM4 PE=1 SV=1 - [A0A0A0MR85_HUMAN]                                                             | 26.61 | 1  | 14 | 25.55  | 5.9 | 0.59 | 8.21E-03 |
| Q59FT7     | Mitogen-activated protein kinase kinase kinase 7 interacting protein 1 isoform alpha variant (Fragment) OS=Homo sapiens PE=2 SV=1 - [Q59FT7_HUMAN] | 4.94  | 2  | 2  | 70.22  | 5.3 | 0.59 | 6.22E-03 |
| Q14643     | Inositol 1,4,5-trisphosphate receptor type 1 OS=Homo sapiens GN=ITPR1 PE=1 SV=3 - [ITPR1_HUMAN]                                                    | 12.8  | 23 | 48 | 313.73 | 6.0 | 0.59 | 6.55E-05 |



|            |                                                                                                                       |       |   |    |        |      |      |          |
|------------|-----------------------------------------------------------------------------------------------------------------------|-------|---|----|--------|------|------|----------|
| P12270     | Nucleoprotein TPR OS=Homo sapiens GN=TPR PE=1 SV=3 - [TPR_HUMAN]                                                      | 1.61  | 2 | 2  | 267.13 | 5.0  | 0.59 | 1.24E-04 |
| Q01970     | 1-phosphatidylinositol 4,5-bisphosphate phosphodiesterase beta-3 OS=Homo sapiens GN=PLCB3 PE=1 SV=2 - [PLCB3_HUMAN]   | 4.38  | 4 | 4  | 138.71 | 5.9  | 0.59 | 1.38E-03 |
| M0R328     | Peroxisomal membrane protein 11C (Fragment) OS=Homo sapiens GN=PEX11G PE=1 SV=1 - [M0R328_HUMAN]                      | 8.33  | 1 | 1  | 18.85  | 8.7  | 0.59 | 2.19E-04 |
| H0YAN8     | Rho guanine nucleotide exchange factor 10 (Fragment) OS=Homo sapiens GN=ARHGEF10 PE=1 SV=1 - [H0YAN8_HUMAN]           | 1.11  | 1 | 1  | 109.58 | 8.0  | 0.59 | 4.45E-03 |
| Q53FP2     | Transmembrane protein 35A OS=Homo sapiens GN=TMEM35A PE=2 SV=2 - [TM35A_HUMAN]                                        | 18.56 | 3 | 4  | 18.43  | 10.1 | 0.59 | 6.42E-03 |
| C9J5H8     | Neurochondrin (Fragment) OS=Homo sapiens GN=NCDN PE=1 SV=1 - [C9J5H8_HUMAN]                                           | 4.92  | 1 | 1  | 26.35  | 5.2  | 0.59 | 4.14E-03 |
| Q7KYR7     | Butyrophilin subfamily 2 member A1 OS=Homo sapiens GN=BTN2A1 PE=1 SV=3 - [BT2A1_HUMAN]                                | 4.36  | 2 | 2  | 59.59  | 6.5  | 0.59 | 2.25E-02 |
| P25685     | DnaJ homolog subfamily B member 1 OS=Homo sapiens GN=DNAJB1 PE=1 SV=4 - [DNJB1_HUMAN]                                 | 13.82 | 5 | 5  | 38.02  | 8.6  | 0.59 | 6.88E-03 |
| B2RCG5     | Dimethylaniline monooxygenase [N-oxide-forming] OS=Homo sapiens PE=2 SV=1 - [B2RCG5_HUMAN]                            | 4.32  | 1 | 2  | 60.27  | 7.4  | 0.59 | 1.67E-04 |
| A0A024RDI4 | Ankyrin 2, neuronal, isoform CRA_a OS=Homo sapiens GN=ANK2 PE=4 SV=1 - [A0A024RDI4_HUMAN]                             | 6.81  | 6 | 32 | 203.31 | 6.2  | 0.59 | 5.70E-03 |
| B4DMB1     | cDNA FLJ53358, highly similar to Heterogeneous nuclear ribonucleoprotein R OS=Homo sapiens PE=2 SV=1 - [B4DMB1_HUMAN] | 10.08 | 3 | 11 | 66.97  | 8.3  | 0.59 | 1.41E-02 |

|            |                                                                                                                                                                                      |       |    |     |        |     |      |          |
|------------|--------------------------------------------------------------------------------------------------------------------------------------------------------------------------------------|-------|----|-----|--------|-----|------|----------|
| P24468     | COUP transcription factor 2 OS=Homo sapiens GN=NR2F2 PE=1 SV=1 - [COT2_HUMAN]                                                                                                        | 10.39 | 3  | 3   | 45.54  | 8.3 | 0.59 | 4.33E-04 |
| A0A0R7FJH5 | Coagulation factor XII OS=Homo sapiens GN=F12 PE=3 SV=1 - [A0A0R7FJH5_HUMAN]                                                                                                         | 2.6   | 2  | 2   | 67.82  | 7.8 | 0.59 | 7.32E-03 |
| A0A0E3KII0 | Low density lipoprotein receptor (Fragment) OS=Homo sapiens GN=LDLR PE=4 SV=1 - [A0A0E3KII0_HUMAN]                                                                                   | 8.04  | 1  | 1   | 12.57  | 7.3 | 0.59 | 9.06E-04 |
| P12956     | X-ray repair cross-complementing protein 6 OS=Homo sapiens GN=XRCC6 PE=1 SV=2 - [XRCC6_HUMAN]                                                                                        | 46.8  | 28 | 76  | 69.80  | 6.6 | 0.59 | 2.97E-04 |
| A8K6S3     | cDNA FLJ77570, highly similar to Homo sapiens pleckstrin homology domain containing, family C (with FERM domain) member 1 (PLEKHC1), mRNA OS=Homo sapiens PE=2 SV=1 - [A8K6S3_HUMAN] | 20.44 | 11 | 17  | 77.83  | 6.7 | 0.60 | 6.08E-03 |
| P08670     | Vimentin OS=Homo sapiens GN=VIM PE=1 SV=4 - [VIME_HUMAN]                                                                                                                             | 65.02 | 25 | 189 | 53.62  | 5.1 | 0.60 | 5.68E-04 |
| Q969G5     | Protein kinase C delta-binding protein OS=Homo sapiens GN=PRKCDBP PE=1 SV=3 - [PRDBP_HUMAN]                                                                                          | 18.77 | 5  | 8   | 27.68  | 6.4 | 0.60 | 2.11E-03 |
| Q53T40     | Putative uncharacterized protein FHL2 (Fragment) OS=Homo sapiens GN=FHL2 PE=4 SV=1 - [Q53T40_HUMAN]                                                                                  | 39.88 | 7  | 9   | 19.29  | 8.1 | 0.60 | 5.09E-03 |
| P49454     | Centromere protein F OS=Homo sapiens GN=CENPF PE=1 SV=2 - [CENPF_HUMAN]                                                                                                              | 0.56  | 2  | 2   | 367.54 | 5.1 | 0.60 | 3.20E-03 |
| E7EW69     | Septin-10 OS=Homo sapiens GN=SEPT10 PE=1 SV=1 - [E7EW69_HUMAN]                                                                                                                       | 24.22 | 5  | 9   | 52.11  | 6.9 | 0.60 | 3.14E-03 |
| E7ENN3     | Nesprin-1 OS=Homo sapiens GN=SYNE1 PE=1 SV=2 - [E7ENN3_HUMAN]                                                                                                                        | 0.61  | 4  | 5   | 964.24 | 5.5 | 0.60 | 1.05E-02 |

|        |                                                                                                                                                              |       |   |    |        |      |      |          |
|--------|--------------------------------------------------------------------------------------------------------------------------------------------------------------|-------|---|----|--------|------|------|----------|
| B4DP97 | cDNA FLJ52934, highly similar to Tyrosine-protein phosphatase non-receptor type substrate 1 OS=Homo sapiens PE=2 SV=1 - [B4DP97_HUMAN]                       | 8.26  | 3 | 5  | 52.87  | 7.5  | 0.60 | 6.42E-03 |
| B4E3S6 | cDNA FLJ58413, highly similar to Complement component C7 OS=Homo sapiens PE=2 SV=1 - [B4E3S6_HUMAN]                                                          | 17.49 | 6 | 10 | 53.68  | 5.4  | 0.60 | 4.66E-03 |
| B2RTQ2 | TBC1 domain family, member 2B, isoform CRA_b OS=Homo sapiens GN=TBC1D2B PE=2 SV=1 - [B2RTQ2_HUMAN]                                                           | 1.43  | 1 | 1  | 96.64  | 6.0  | 0.60 | 1.23E-03 |
| Q86YZ3 | Hornerin OS=Homo sapiens GN=HRNR PE=1 SV=2 - [HORN_HUMAN]                                                                                                    | 1.93  | 1 | 3  | 282.23 | 10.0 | 0.60 | 3.91E-02 |
| B3KU30 | cDNA FLJ39125 fis, clone NTONG2007034, highly similar to Homo sapiens collagen, type XXI, alpha 1 (COL21A1), mRNA OS=Homo sapiens PE=2 SV=1 - [B3KU30_HUMAN] | 3.5   | 1 | 1  | 33.15  | 9.2  | 0.60 | 1.57E-02 |
| P19623 | Spermidine synthase OS=Homo sapiens GN=SRM PE=1 SV=1 - [SPEE_HUMAN]                                                                                          | 6.95  | 2 | 2  | 33.80  | 5.5  | 0.60 | 8.63E-03 |
| A0M8Q2 | Phosphatase 2C motif OS=Homo sapiens PE=3 SV=1 - [A0M8Q2_HUMAN]                                                                                              | 11.95 | 3 | 3  | 42.58  | 5.5  | 0.60 | 7.76E-03 |
| K7EK35 | Signal transducer and activator of transcription OS=Homo sapiens GN=STAT5A PE=1 SV=1 - [K7EK35_HUMAN]                                                        | 4.72  | 1 | 3  | 87.31  | 6.6  | 0.60 | 1.00E-02 |
| Q9NZJ9 | Diphosphoinositol polyphosphate phosphohydrolase 2 OS=Homo sapiens GN=NUDT4 PE=1 SV=2 - [NUDT4_HUMAN]                                                        | 12.78 | 2 | 3  | 20.29  | 6.4  | 0.60 | 2.59E-04 |
| A6NLG9 | cDNA FLJ36740 fis, clone UTERU2013322, highly similar to Biglycan OS=Homo sapiens PE=2 SV=1 - [A6NLG9_HUMAN]                                                 | 38.11 | 8 | 27 | 34.85  | 8.9  | 0.60 | 2.97E-03 |
| C9JES6 | Calcium/calmodulin-dependent protein kinase type 1 (Fragment) OS=Homo sapiens GN=CAMK1 PE=1 SV=1 - [C9JES6_HUMAN]                                            | 22.13 | 2 | 2  | 14.01  | 4.9  | 0.60 | 2.35E-03 |

|        |                                                                                                                                                                              |       |    |    |        |     |      |          |
|--------|------------------------------------------------------------------------------------------------------------------------------------------------------------------------------|-------|----|----|--------|-----|------|----------|
| B4DIT7 | cDNA FLJ58187, highly similar to Protein-glutamine gamma-glutamyltransferase 2(EC 2.3.2.13) OS=Homo sapiens PE=2 SV=1 - [B4DIT7_HUMAN]                                       | 16.34 | 9  | 20 | 68.61  | 5.3 | 0.60 | 1.96E-03 |
| O43491 | Band 4.1-like protein 2 OS=Homo sapiens GN=EPB41L2 PE=1 SV=1 - [E41L2_HUMAN]                                                                                                 | 30.05 | 20 | 38 | 112.52 | 5.4 | 0.60 | 3.98E-04 |
| B7Z650 | cDNA FLJ58685, highly similar to Homo sapiens echinoderm microtubule associated protein like 1 (EML1), transcript variant 1, mRNA OS=Homo sapiens PE=2 SV=1 - [B7Z650_HUMAN] | 1.12  | 1  | 1  | 88.70  | 8.0 | 0.60 | 1.29E-03 |
| Q969Z3 | Mitochondrial amidoxime reducing component 2 OS=Homo sapiens GN=MARC2 PE=1 SV=1 - [MARC2_HUMAN]                                                                              | 23.58 | 7  | 26 | 38.00  | 9.2 | 0.60 | 1.77E-03 |
| P13010 | X-ray repair cross-complementing protein 5 OS=Homo sapiens GN=XRCC5 PE=1 SV=3 - [XRCC5_HUMAN]                                                                                | 44.54 | 26 | 75 | 82.65  | 5.8 | 0.60 | 2.55E-03 |
| B2RA94 | cDNA, FLJ94779 OS=Homo sapiens PE=2 SV=1 - [B2RA94_HUMAN]                                                                                                                    | 7.96  | 3  | 4  | 45.71  | 8.7 | 0.60 | 5.70E-03 |
| B4DF70 | cDNA FLJ60461, highly similar to Peroxiredoxin-2 (EC 1.11.1.15) OS=Homo sapiens PE=2 SV=1 - [B4DF70_HUMAN]                                                                   | 43.72 | 7  | 32 | 20.09  | 8.8 | 0.60 | 1.23E-04 |
| P23141 | Liver carboxylesterase 1 OS=Homo sapiens GN=CES1 PE=1 SV=2 - [EST1_HUMAN]                                                                                                    | 28.04 | 13 | 21 | 62.48  | 6.6 | 0.60 | 1.12E-03 |
| H7C272 | Checkpoint protein HUS1 (Fragment) OS=Homo sapiens GN=HUS1 PE=1 SV=1 - [H7C272_HUMAN]                                                                                        | 10.48 | 1  | 1  | 11.79  | 9.7 | 0.60 | 2.49E-02 |
| Q9UBG0 | C-type mannose receptor 2 OS=Homo sapiens GN=MRC2 PE=1 SV=2 - [MRC2_HUMAN]                                                                                                   | 9.06  | 12 | 16 | 166.57 | 5.8 | 0.61 | 2.42E-03 |
| P10768 | S-formylglutathione hydrolase OS=Homo sapiens GN=ESD PE=1 SV=2 - [ESTD_HUMAN]                                                                                                | 12.06 | 3  | 3  | 31.44  | 7.0 | 0.61 | 2.00E-02 |

|            |                                                                                                |       |    |     |        |      |      |          |
|------------|------------------------------------------------------------------------------------------------|-------|----|-----|--------|------|------|----------|
| Q96KK5     | Histone H2A type 1-H OS=Homo sapiens GN=HIST1H2AH PE=1 SV=3 - [H2A1H_HUMAN]                    | 38.28 | 1  | 61  | 13.90  | 10.9 | 0.61 | 9.20E-04 |
| P00568     | Adenylate kinase isoenzyme 1 OS=Homo sapiens GN=AK1 PE=1 SV=3 - [KAD1_HUMAN]                   | 41.24 | 7  | 11  | 21.62  | 8.6  | 0.61 | 5.33E-03 |
| S4R3K4     | Nuclear factor 1 (Fragment) OS=Homo sapiens GN=NFIA PE=1 SV=1 - [S4R3K4_HUMAN]                 | 12.37 | 2  | 3   | 20.95  | 6.9  | 0.61 | 5.32E-04 |
| A0A1B0GTG3 | Aminoacylase-1 OS=Homo sapiens GN=ACY1 PE=4 SV=1 - [A0A1B0GTG3_HUMAN]                          | 17.7  | 1  | 1   | 12.19  | 5.7  | 0.61 | 3.02E-03 |
| P21333     | Filamin-A OS=Homo sapiens GN=FLNA PE=1 SV=4 - [FLNA_HUMAN]                                     | 45.41 | 82 | 266 | 280.56 | 6.1  | 0.61 | 1.99E-04 |
| Q9H1E5     | Thioredoxin-related transmembrane protein 4 OS=Homo sapiens GN=TMX4 PE=1 SV=1 - [TMX4_HUMAN]   | 18.05 | 6  | 12  | 38.93  | 4.4  | 0.61 | 7.15E-04 |
| G3V144     | SH3 and PX domain-containing protein 2B OS=Homo sapiens GN=SH3PXD2B PE=1 SV=1 - [G3V144_HUMAN] | 4.42  | 2  | 2   | 49.14  | 7.2  | 0.61 | 1.06E-03 |
| F8W0M9     | Secernin-3 (Fragment) OS=Homo sapiens GN=SCRN3 PE=1 SV=1 - [F8W0M9_HUMAN]                      | 5.26  | 1  | 1   | 23.59  | 4.8  | 0.61 | 5.69E-04 |
| P42773     | Cyclin-dependent kinase 4 inhibitor C OS=Homo sapiens GN=CDKN2C PE=1 SV=1 - [CDN2C_HUMAN]      | 6.55  | 1  | 2   | 18.12  | 6.5  | 0.61 | 1.62E-02 |
| B1AKG0     | Complement factor H-related protein 1 OS=Homo sapiens GN=CFHR1 PE=1 SV=1 - [B1AKG0_HUMAN]      | 12.55 | 2  | 4   | 30.84  | 7.8  | 0.61 | 4.16E-03 |
| A0A0S2Z377 | Annexin (Fragment) OS=Homo sapiens GN=ANXA6 PE=2 SV=1 - [A0A0S2Z377_HUMAN]                     | 60.27 | 1  | 153 | 75.23  | 5.7  | 0.61 | 1.20E-03 |

|            |                                                                                                                                                                           |       |    |     |        |     |      |          |
|------------|---------------------------------------------------------------------------------------------------------------------------------------------------------------------------|-------|----|-----|--------|-----|------|----------|
| P07355     | Annexin A2 OS=Homo sapiens GN=ANXA2 PE=1 SV=2 - [ANXA2_HUMAN]                                                                                                             | 61.65 | 21 | 110 | 38.58  | 7.8 | 0.61 | 8.71E-04 |
| K9J968     | GDNF family receptor alpha-3 variant OS=Homo sapiens GN=GDNFR3 PE=2 SV=1 - [K9J968_HUMAN]                                                                                 | 5.15  | 1  | 1   | 40.90  | 7.7 | 0.61 | 2.20E-02 |
| A0A0C4DG09 | Cell adhesion molecule 3 (Fragment) OS=Homo sapiens GN=CADM3 PE=1 SV=1 - [A0A0C4DG09_HUMAN]                                                                               | 7.69  | 1  | 2   | 25.64  | 6.4 | 0.61 | 9.69E-03 |
| B2RTX2     | Palladin, cytoskeletal associated protein OS=Homo sapiens GN=PALLD PE=2 SV=1 - [B2RTX2_HUMAN]                                                                             | 2.89  | 3  | 4   | 121.97 | 6.9 | 0.61 | 3.41E-03 |
| K7ER90     | Eukaryotic translation initiation factor 3 subunit G (Fragment) OS=Homo sapiens GN=EIF3G PE=1 SV=1 - [K7ER90_HUMAN]                                                       | 9.25  | 2  | 2   | 25.43  | 5.5 | 0.61 | 7.81E-04 |
| P19075     | Tetraspanin-8 OS=Homo sapiens GN=TSPAN8 PE=1 SV=1 - [TSN8_HUMAN]                                                                                                          | 10.13 | 2  | 2   | 26.03  | 5.6 | 0.61 | 9.19E-04 |
| Q9NZN3     | EH domain-containing protein 3 OS=Homo sapiens GN=EHD3 PE=1 SV=2 - [EHD3_HUMAN]                                                                                           | 18.69 | 1  | 16  | 60.85  | 6.6 | 0.61 | 9.64E-03 |
| Q53FP0     | Pyridoxine 5'-phosphate oxidase variant (Fragment) OS=Homo sapiens PE=2 SV=1 - [Q53FP0_HUMAN]                                                                             | 12.64 | 2  | 3   | 29.90  | 7.4 | 0.61 | 9.70E-03 |
| A0A0A0MSB3 | cGMP-dependent protein kinase 1 OS=Homo sapiens GN=PRKG1 PE=1 SV=1 - [A0A0A0MSB3_HUMAN]                                                                                   | 1.96  | 1  | 1   | 51.87  | 5.6 | 0.61 | 7.80E-03 |
| G4V2I8     | Anion exchange protein OS=Homo sapiens PE=2 SV=1 - [G4V2I8_HUMAN]                                                                                                         | 22.72 | 18 | 48  | 101.68 | 5.2 | 0.61 | 7.16E-04 |
| B2R6K4     | cDNA, FLJ92996, highly similar to Homo sapiens guanine nucleotide binding protein (G protein), beta polypeptide 1 (GNB1), mRNA OS=Homo sapiens PE=2 SV=1 - [B2R6K4_HUMAN] | 39.71 | 5  | 30  | 37.28  | 6.2 | 0.61 | 1.82E-02 |

|        |                                                                                                                                   |       |    |    |        |     |      |          |
|--------|-----------------------------------------------------------------------------------------------------------------------------------|-------|----|----|--------|-----|------|----------|
| X6RCK5 | Dynactin subunit 3 (Fragment) OS=Homo sapiens<br>GN=DCTN3 PE=1 SV=1 - [X6RCK5_HUMAN]                                              | 31.13 | 4  | 8  | 17.29  | 6.6 | 0.61 | 2.42E-03 |
| A6NFY4 | Nuclear envelope integral membrane protein 2 OS=Homo sapiens<br>GN=NEMP2 PE=2 SV=3 - [NEMP2_HUMAN]                                | 1.92  | 1  | 2  | 48.63  | 8.3 | 0.61 | 5.26E-03 |
| Q8N5Y3 | GYG1 protein (Fragment) OS=Homo sapiens GN=GYG1<br>PE=2 SV=2 - [Q8N5Y3_HUMAN]                                                     | 8.46  | 2  | 3  | 37.22  | 5.4 | 0.61 | 3.20E-03 |
| B2RAH7 | cDNA, FLJ94921, highly similar to Homo sapiens prolyl<br>endopeptidase (PREP), mRNA OS=Homo sapiens PE=2<br>SV=1 - [B2RAH7_HUMAN] | 11.41 | 6  | 9  | 80.68  | 5.9 | 0.61 | 6.99E-04 |
| P14543 | Nidogen-1 OS=Homo sapiens GN=NID1 PE=1 SV=3 -<br>[NID1_HUMAN]                                                                     | 6.09  | 5  | 8  | 136.29 | 5.3 | 0.61 | 3.11E-04 |
| P83110 | Serine protease HTRA3 OS=Homo sapiens GN=HTRA3<br>PE=1 SV=2 - [HTRA3_HUMAN]                                                       | 5.08  | 1  | 2  | 48.58  | 7.1 | 0.61 | 2.47E-03 |
| B8ZZA2 | Hyccin OS=Homo sapiens GN=FAM126A PE=1 SV=1 -<br>[B8ZZA2_HUMAN]                                                                   | 9.65  | 1  | 1  | 13.00  | 4.7 | 0.61 | 3.76E-04 |
| B3KU56 | cDNA FLJ39220 fis, clone OCBBF2006859, highly similar to<br>Fibrillin-3 OS=Homo sapiens PE=2 SV=1 -<br>[B3KU56_HUMAN]             | 2.31  | 1  | 1  | 70.14  | 6.2 | 0.62 | 3.39E-03 |
| Q16647 | Prostacyclin synthase OS=Homo sapiens GN=PTGIS PE=1<br>SV=1 - [PTGIS_HUMAN]                                                       | 18.8  | 7  | 17 | 57.07  | 7.3 | 0.62 | 4.68E-03 |
| S4R3A2 | Fatty acid-binding protein, heart OS=Homo sapiens<br>GN=FABP3 PE=1 SV=1 - [S4R3A2_HUMAN]                                          | 39.33 | 3  | 5  | 10.16  | 9.0 | 0.62 | 8.58E-03 |
| P23396 | 40S ribosomal protein S3 OS=Homo sapiens GN=RPS3<br>PE=1 SV=2 - [RS3_HUMAN]                                                       | 65.43 | 15 | 46 | 26.67  | 9.7 | 0.62 | 5.61E-05 |

|        |                                                                                                                           |       |   |    |       |     |      |          |
|--------|---------------------------------------------------------------------------------------------------------------------------|-------|---|----|-------|-----|------|----------|
| Q5T123 | SH3 domain-binding glutamic acid-rich-like protein 3<br>OS=Homo sapiens GN=SH3BGRL3 PE=1 SV=1 -<br>[Q5T123_HUMAN]         | 28.41 | 3 | 4  | 9.37  | 9.4 | 0.62 | 6.28E-03 |
| P30043 | Flavin reductase (NADPH) OS=Homo sapiens GN=BLVRB<br>PE=1 SV=3 - [BLVRB_HUMAN]                                            | 34.47 | 6 | 16 | 22.11 | 7.6 | 0.62 | 7.08E-04 |
| Q6PJF2 | IGK@ protein OS=Homo sapiens GN=IGK@ PE=1 SV=1 -<br>[Q6PJF2_HUMAN]                                                        | 42.98 | 1 | 52 | 25.50 | 6.6 | 0.62 | 7.95E-04 |
| Q8TB45 | DEP domain-containing mTOR-interacting protein<br>OS=Homo sapiens GN=DEPTOR PE=1 SV=2 -<br>[DPTOR_HUMAN]                  | 4.4   | 2 | 4  | 46.26 | 8.1 | 0.62 | 1.59E-03 |
| P05546 | Heparin cofactor 2 OS=Homo sapiens GN=SERPIND1<br>PE=1 SV=3 - [HEP2_HUMAN]                                                | 5.01  | 3 | 4  | 57.03 | 6.9 | 0.62 | 1.55E-03 |
| Q9NRV9 | Heme-binding protein 1 OS=Homo sapiens GN=HEBP1<br>PE=1 SV=1 - [HEBP1_HUMAN]                                              | 13.76 | 2 | 2  | 21.08 | 5.8 | 0.62 | 2.60E-04 |
| E7EQG2 | Eukaryotic initiation factor 4A-II OS=Homo sapiens<br>GN=EIF4A2 PE=1 SV=1 - [E7EQG2_HUMAN]                                | 44.48 | 6 | 32 | 41.26 | 5.6 | 0.62 | 1.08E-02 |
| Q96RF0 | Sorting nexin-18 OS=Homo sapiens GN=SNX18 PE=1<br>SV=2 - [SNX18_HUMAN]                                                    | 11.46 | 6 | 9  | 68.85 | 5.7 | 0.62 | 2.52E-03 |
| Q5W0G0 | Kin of IRRE-like protein 1 OS=Homo sapiens GN=KIRREL<br>PE=1 SV=1 - [Q5W0G0_HUMAN]                                        | 5.95  | 2 | 2  | 63.06 | 5.9 | 0.62 | 3.14E-03 |
| K7EKG4 | Mitochondrial import receptor subunit TOM40 homolog<br>(Fragment) OS=Homo sapiens GN=TOMM40 PE=1 SV=1 -<br>[K7EKG4_HUMAN] | 40.48 | 1 | 30 | 18.27 | 8.7 | 0.62 | 3.46E-03 |
| Q96FJ2 | Dynein light chain 2, cytoplasmic OS=Homo sapiens<br>GN=DYNLL2 PE=1 SV=1 - [DYL2_HUMAN]                                   | 7.87  | 1 | 3  | 10.34 | 7.4 | 0.62 | 1.56E-03 |



|            |                                                                                                                                                                              |       |   |    |        |     |      |          |
|------------|------------------------------------------------------------------------------------------------------------------------------------------------------------------------------|-------|---|----|--------|-----|------|----------|
| B4DTA2     | cDNA FLJ60148, highly similar to Homo sapiens heterogeneous nuclear ribonucleoprotein D-like (HNRPDL), transcript variant 2, mRNA OS=Homo sapiens PE=2 SV=1 - [B4DTA2_HUMAN] | 16.61 | 3 | 18 | 30.20  | 8.7 | 0.62 | 1.32E-03 |
| P02765     | Alpha-2-HS-glycoprotein OS=Homo sapiens GN=AHSG PE=1 SV=1 - [FETUA_HUMAN]                                                                                                    | 11.17 | 5 | 10 | 39.30  | 5.7 | 0.62 | 1.53E-03 |
| B4DVV1     | cDNA FLJ51526, highly similar to Homo sapiens aldehyde dehydrogenase 16 family, member A1 (ALDH16A1), mRNA OS=Homo sapiens PE=2 SV=1 - [B4DVV1_HUMAN]                        | 7.54  | 3 | 4  | 66.85  | 7.1 | 0.62 | 8.89E-03 |
| Q53F27     | Transmembrane protein 14C variant (Fragment) OS=Homo sapiens PE=2 SV=1 - [Q53F27_HUMAN]                                                                                      | 24.11 | 2 | 4  | 11.57  | 9.9 | 0.62 | 1.17E-03 |
| A6NFS0     | Zinc finger protein 275 OS=Homo sapiens GN=ZNF275 PE=1 SV=1 - [A6NFS0_HUMAN]                                                                                                 | 2.43  | 1 | 1  | 37.02  | 8.4 | 0.62 | 2.14E-02 |
| O95865     | N(G),N(G)-dimethylarginine dimethylaminohydrolase 2 OS=Homo sapiens GN=DDAH2 PE=1 SV=1 - [DDAH2_HUMAN]                                                                       | 36.14 | 7 | 16 | 29.63  | 6.0 | 0.62 | 2.41E-03 |
| F6RFD5     | Destrin OS=Homo sapiens GN=DSTN PE=1 SV=1 - [F6RFD5_HUMAN]                                                                                                                   | 44.44 | 6 | 20 | 15.39  | 8.6 | 0.62 | 4.52E-04 |
| I3L3A7     | Mapk-regulated corepressor-interacting protein 1 OS=Homo sapiens GN=MCRIP1 PE=1 SV=1 - [I3L3A7_HUMAN]                                                                        | 28.57 | 1 | 1  | 7.11   | 9.9 | 0.62 | 3.69E-03 |
| Q10588     | ADP-ribosyl cyclase/cyclic ADP-ribose hydrolase 2 OS=Homo sapiens GN=BST1 PE=1 SV=2 - [BST1_HUMAN]                                                                           | 25.16 | 6 | 7  | 35.70  | 7.8 | 0.62 | 1.28E-03 |
| A0A0S2Z5I6 | Optineurin isoform 3 OS=Homo sapiens GN=OPTN PE=2 SV=1 - [A0A0S2Z5I6_HUMAN]                                                                                                  | 7.94  | 2 | 2  | 28.30  | 5.3 | 0.62 | 1.01E-02 |
| Q59GS8     | Complement component 5 variant (Fragment) OS=Homo sapiens PE=2 SV=1 - [Q59GS8_HUMAN]                                                                                         | 6.51  | 6 | 8  | 123.27 | 8.2 | 0.62 | 5.41E-04 |

|        |                                                                                                                              |       |    |    |        |     |      |          |
|--------|------------------------------------------------------------------------------------------------------------------------------|-------|----|----|--------|-----|------|----------|
| P49756 | RNA-binding protein 25 OS=Homo sapiens GN=RBM25<br>PE=1 SV=3 - [RBM25_HUMAN]                                                 | 1.78  | 1  | 1  | 100.12 | 6.3 | 0.62 | 3.54E-02 |
| B4E2Z6 | Eukaryotic translation initiation factor 3 subunit C OS=Homo sapiens GN=EIF3C PE=2 SV=1 - [B4E2Z6_HUMAN]                     | 19.52 | 11 | 20 | 90.48  | 5.7 | 0.62 | 6.44E-04 |
| B4DES6 | cDNA FLJ52441, highly similar to Zinc finger protein 512 OS=Homo sapiens PE=2 SV=1 - [B4DES6_HUMAN]                          | 5.19  | 2  | 2  | 53.09  | 9.6 | 0.62 | 4.75E-03 |
| A8K941 | cDNA FLJ77618 OS=Homo sapiens PE=2 SV=1 - [A8K941_HUMAN]                                                                     | 1.55  | 1  | 1  | 79.36  | 7.8 | 0.63 | 1.83E-03 |
| E9PGZ1 | Caldesmon OS=Homo sapiens GN=CALD1 PE=1 SV=1 - [E9PGZ1_HUMAN]                                                                | 16.98 | 9  | 14 | 61.67  | 6.1 | 0.63 | 6.10E-04 |
| Q5T6V5 | UPF0553 protein C9orf64 OS=Homo sapiens GN=C9orf64 PE=1 SV=1 - [CI064_HUMAN]                                                 | 15.54 | 5  | 7  | 39.00  | 5.9 | 0.63 | 6.81E-04 |
| P24593 | Insulin-like growth factor-binding protein 5 OS=Homo sapiens GN=IGFBP5 PE=1 SV=1 - [IBP5_HUMAN]                              | 2.94  | 1  | 3  | 30.55  | 8.2 | 0.63 | 2.08E-04 |
| B4DMJ3 | cDNA FLJ52994, highly similar to Guanidinoacetate N-methyltransferase (EC2.1.1.2) OS=Homo sapiens PE=2 SV=1 - [B4DMJ3_HUMAN] | 17.36 | 1  | 1  | 12.96  | 6.5 | 0.63 | 1.14E-02 |
| O60262 | Guanine nucleotide-binding protein G(I)/G(S)/G(O) subunit gamma-7 OS=Homo sapiens GN=GNG7 PE=1 SV=1 - [GBG7_HUMAN]           | 44.12 | 2  | 3  | 7.52   | 8.5 | 0.63 | 3.91E-03 |
| P43034 | Platelet-activating factor acetylhydrolase IB subunit alpha OS=Homo sapiens GN=PAFAH1B1 PE=1 SV=2 - [LIS1_HUMAN]             | 16.59 | 5  | 9  | 46.61  | 7.4 | 0.63 | 6.20E-03 |
| B7ZLW0 | LPP protein OS=Homo sapiens GN=LPP PE=2 SV=1 - [B7ZLW0_HUMAN]                                                                | 10.62 | 4  | 7  | 65.73  | 7.4 | 0.63 | 1.85E-03 |

|            |                                                                                                             |       |    |    |        |     |      |          |
|------------|-------------------------------------------------------------------------------------------------------------|-------|----|----|--------|-----|------|----------|
| B4DSV9     | cDNA FLJ56632, moderately similar to Target of Nesh-SH3 OS=Homo sapiens PE=2 SV=1 - [B4DSV9_HUMAN]          | 1.26  | 1  | 1  | 113.36 | 9.6 | 0.63 | 1.24E-02 |
| Q9H2D6     | TRIO and F-actin-binding protein OS=Homo sapiens GN=TRIOBP PE=1 SV=3 - [TARA_HUMAN]                         | 1.35  | 3  | 3  | 261.22 | 8.5 | 0.63 | 3.27E-02 |
| A0A024R8V0 | Septin 9, isoform CRA_a OS=Homo sapiens GN=SEPT9 PE=3 SV=1 - [A0A024R8V0_HUMAN]                             | 20.77 | 10 | 17 | 63.59  | 8.4 | 0.63 | 2.99E-04 |
| B4DIH5     | COP9 signalosome complex subunit 2 OS=Homo sapiens GN=COPS2 PE=1 SV=1 - [B4DIH5_HUMAN]                      | 20.32 | 7  | 9  | 44.20  | 5.9 | 0.63 | 7.70E-04 |
| P19338     | Nucleolin OS=Homo sapiens GN=NCL PE=1 SV=3 - [NUCL_HUMAN]                                                   | 35.63 | 27 | 63 | 76.57  | 4.7 | 0.63 | 1.18E-04 |
| B4DQF6     | Eukaryotic translation initiation factor 3 subunit L OS=Homo sapiens GN=EIF3L PE=2 SV=1 - [B4DQF6_HUMAN]    | 6.97  | 4  | 7  | 62.65  | 6.2 | 0.63 | 1.71E-03 |
| Q6KCM7     | Calcium-binding mitochondrial carrier protein SCaMC-2 OS=Homo sapiens GN=SLC25A25 PE=1 SV=1 - [SCMC2_HUMAN] | 18.55 | 5  | 15 | 52.63  | 8.4 | 0.63 | 8.83E-05 |
| B7Z3I9     | Delta-aminolevulinic acid dehydratase OS=Homo sapiens PE=2 SV=1 - [B7Z3I9_HUMAN]                            | 13.74 | 3  | 3  | 34.50  | 7.2 | 0.63 | 3.27E-03 |
| P04004     | Vitronectin OS=Homo sapiens GN=VTN PE=1 SV=1 - [VTNC_HUMAN]                                                 | 21.34 | 9  | 28 | 54.27  | 5.8 | 0.63 | 5.26E-04 |
| A8KA05     | Protein argonaute-3 OS=Homo sapiens GN=EIF2C3 PE=2 SV=1 - [A8KA05_HUMAN]                                    | 4.19  | 2  | 3  | 97.27  | 9.1 | 0.63 | 7.05E-03 |
| Q15555     | Microtubule-associated protein RP/EB family member 2 OS=Homo sapiens GN=MAPRE2 PE=1 SV=1 - [MARE2_HUMAN]    | 5.5   | 1  | 3  | 37.01  | 5.6 | 0.63 | 1.18E-02 |

|        |                                                                                                                                |       |    |    |        |      |      |          |
|--------|--------------------------------------------------------------------------------------------------------------------------------|-------|----|----|--------|------|------|----------|
| Q66K79 | Carboxypeptidase Z OS=Homo sapiens GN=CPZ PE=1 SV=2 - [CBPZ_HUMAN]                                                             | 6.13  | 3  | 7  | 73.61  | 8.0  | 0.63 | 1.86E-02 |
| Q8WVC2 | 40S ribosomal protein S21 OS=Homo sapiens GN=RPS21 PE=1 SV=1 - [Q8WVC2_HUMAN]                                                  | 12.35 | 1  | 3  | 8.84   | 8.5  | 0.63 | 3.09E-03 |
| B2R9T9 | cDNA, FLJ94551 OS=Homo sapiens PE=2 SV=1 - [B2R9T9_HUMAN]                                                                      | 9.05  | 3  | 13 | 26.18  | 10.7 | 0.63 | 3.82E-03 |
| Q13563 | Polycystin-2 OS=Homo sapiens GN=PKD2 PE=1 SV=3 - [PKD2_HUMAN]                                                                  | 4.03  | 3  | 5  | 109.62 | 5.7  | 0.63 | 1.96E-03 |
| Q14764 | Major vault protein OS=Homo sapiens GN=MVP PE=1 SV=4 - [MVP_HUMAN]                                                             | 31.13 | 22 | 48 | 99.27  | 5.5  | 0.63 | 1.49E-03 |
| Q5QJ74 | Tubulin-specific chaperone cofactor E-like protein OS=Homo sapiens GN=TBCEL PE=1 SV=2 - [TBCEL_HUMAN]                          | 5.9   | 1  | 2  | 48.16  | 5.4  | 0.63 | 2.32E-02 |
| B4DM44 | cDNA FLJ57324, highly similar to Segment polarity protein dishevelled homolog DVL-2 OS=Homo sapiens PE=2 SV=1 - [B4DM44_HUMAN] | 5.91  | 1  | 1  | 22.76  | 9.3  | 0.63 | 2.46E-02 |
| Q86UD1 | Out at first protein homolog OS=Homo sapiens GN=OAF PE=2 SV=1 - [OAF_HUMAN]                                                    | 3.3   | 1  | 1  | 30.67  | 6.8  | 0.63 | 5.10E-03 |
| Q16186 | Proteasomal ubiquitin receptor ADRM1 OS=Homo sapiens GN=ADRM1 PE=1 SV=2 - [ADRM1_HUMAN]                                        | 6.14  | 2  | 4  | 42.13  | 5.1  | 0.63 | 2.19E-03 |
| P20700 | Lamin-B1 OS=Homo sapiens GN=LMNB1 PE=1 SV=2 - [LMNB1_HUMAN]                                                                    | 12.12 | 6  | 17 | 66.37  | 5.2  | 0.63 | 7.14E-03 |
| H0YB18 | Putative hydroxypyruvate isomerase (Fragment) OS=Homo sapiens GN=HYI PE=1 SV=1 - [H0YB18_HUMAN]                                | 23.6  | 2  | 3  | 17.69  | 5.5  | 0.63 | 3.10E-02 |

|            |                                                                                                                                         |       |   |    |        |     |      |          |
|------------|-----------------------------------------------------------------------------------------------------------------------------------------|-------|---|----|--------|-----|------|----------|
| Q86T13     | C-type lectin domain family 14 member A OS=Homo sapiens GN=CLEC14A PE=1 SV=1 - [CLC14_HUMAN]                                            | 4.9   | 1 | 2  | 51.60  | 6.4 | 0.63 | 7.04E-04 |
| X6RDA4     | Paraspeckle component 1 (Fragment) OS=Homo sapiens GN=PSPC1 PE=1 SV=1 - [X6RDA4_HUMAN]                                                  | 4.84  | 1 | 1  | 27.26  | 5.5 | 0.63 | 1.36E-02 |
| Q9Y680     | Peptidyl-prolyl cis-trans isomerase FKBP7 OS=Homo sapiens GN=FKBP7 PE=1 SV=1 - [FKBP7_HUMAN]                                            | 20.85 | 5 | 8  | 29.99  | 6.5 | 0.63 | 2.12E-03 |
| A0A087X142 | Septin-8 OS=Homo sapiens GN=SEPT8 PE=1 SV=1 - [A0A087X142_HUMAN]                                                                        | 18.31 | 3 | 16 | 49.33  | 6.2 | 0.63 | 5.87E-03 |
| O75891     | Cytosolic 10-formyltetrahydrofolate dehydrogenase OS=Homo sapiens GN=ALDH1L1 PE=1 SV=2 - [AL1L1_HUMAN]                                  | 4.88  | 3 | 7  | 98.77  | 5.9 | 0.64 | 2.95E-03 |
| Q96P70     | Importin-9 OS=Homo sapiens GN=IPO9 PE=1 SV=3 - [IPO9_HUMAN]                                                                             | 1.34  | 1 | 1  | 115.89 | 4.8 | 0.64 | 4.22E-03 |
| A0A142CHG9 | GO2-q chimeric G-protein OS=Homo sapiens PE=2 SV=1 - [A0A142CHG9_HUMAN]                                                                 | 26.84 | 2 | 44 | 40.21  | 6.0 | 0.64 | 9.34E-04 |
| B7Z8Y6     | cDNA FLJ58394, highly similar to Platelet endothelial cell adhesion molecule OS=Homo sapiens PE=2 SV=1 - [B7Z8Y6_HUMAN]                 | 8.73  | 5 | 5  | 81.73  | 6.7 | 0.64 | 1.24E-03 |
| Q8TD57     | Dynein heavy chain 3, axonemal OS=Homo sapiens GN=DNAH3 PE=2 SV=1 - [DYH3_HUMAN]                                                        | 0.15  | 1 | 1  | 470.47 | 6.4 | 0.64 | 1.65E-03 |
| B4DGA3     | cDNA FLJ55898, highly similar to Receptor-type tyrosine-protein phosphatase mu (EC 3.1.3.48) OS=Homo sapiens PE=2 SV=1 - [B4DGA3_HUMAN] | 2.74  | 2 | 2  | 140.02 | 6.7 | 0.64 | 8.85E-03 |
| P32969     | 60S ribosomal protein L9 OS=Homo sapiens GN=RPL9 PE=1 SV=1 - [RL9_HUMAN]                                                                | 39.58 | 7 | 20 | 21.85  | 9.9 | 0.64 | 2.02E-03 |

|        |                                                                                                                                                                       |       |   |     |       |     |      |          |
|--------|-----------------------------------------------------------------------------------------------------------------------------------------------------------------------|-------|---|-----|-------|-----|------|----------|
| I6L969 | FBF1 protein (Fragment) OS=Homo sapiens GN=FBF1 PE=2 SV=1 - [I6L969_HUMAN]                                                                                            | 0.85  | 1 | 1   | 91.90 | 6.9 | 0.64 | 1.10E-02 |
| E9PMB9 | Malic enzyme (Fragment) OS=Homo sapiens GN=ME3 PE=1 SV=8 - [E9PMB9_HUMAN]                                                                                             | 15.86 | 6 | 11  | 64.24 | 8.3 | 0.64 | 6.14E-03 |
| B4DEK9 | Semaphorin-3B OS=Homo sapiens GN=SEMA3B PE=1 SV=1 - [B4DEK9_HUMAN]                                                                                                    | 3.45  | 1 | 1   | 45.01 | 9.7 | 0.64 | 4.15E-02 |
| J3KTF8 | Rho GDP-dissociation inhibitor 1 (Fragment) OS=Homo sapiens GN=ARHGDI1 PE=1 SV=8 - [J3KTF8_HUMAN]                                                                     | 25.39 | 4 | 7   | 21.50 | 5.5 | 0.64 | 6.21E-03 |
| V9HW68 | Epididymis luminal protein 214 OS=Homo sapiens GN=HEL-214 PE=2 SV=1 - [V9HW68_HUMAN]                                                                                  | 38.09 | 1 | 157 | 51.68 | 7.8 | 0.64 | 4.78E-03 |
| B3KTE8 | cDNA FLJ38146 fis, clone D9OST2003594, highly similar to Homo sapiens solute carrier family 25, member 30 (SLC25A30), mRNA OS=Homo sapiens PE=2 SV=1 - [B3KTE8_HUMAN] | 4.17  | 1 | 1   | 24.19 | 9.2 | 0.64 | 3.27E-04 |
| Q86W50 | Methyltransferase-like protein 16 OS=Homo sapiens GN=METTL16 PE=1 SV=2 - [MET16_HUMAN]                                                                                | 4.63  | 1 | 1   | 63.58 | 7.9 | 0.64 | 1.64E-02 |
| O15371 | Eukaryotic translation initiation factor 3 subunit D OS=Homo sapiens GN=EIF3D PE=1 SV=1 - [EIF3D_HUMAN]                                                               | 12.77 | 5 | 10  | 63.93 | 6.0 | 0.64 | 3.21E-03 |
| P35237 | Serpin B6 OS=Homo sapiens GN=SERPINB6 PE=1 SV=3 - [SPB6_HUMAN]                                                                                                        | 25.27 | 7 | 12  | 42.59 | 5.3 | 0.64 | 8.99E-04 |
| Q86SR1 | Polypeptide N-acetylgalactosaminyltransferase 10 OS=Homo sapiens GN=GALNT10 PE=1 SV=2 - [GLT10_HUMAN]                                                                 | 12.44 | 5 | 7   | 68.95 | 8.6 | 0.64 | 4.51E-04 |
| B4DJI2 | cDNA FLJ53342, highly similar to Granulins OS=Homo sapiens PE=2 SV=1 - [B4DJI2_HUMAN]                                                                                 | 6.79  | 3 | 6   | 56.81 | 6.9 | 0.64 | 7.61E-03 |

|        |                                                                                                                                      |       |    |    |        |     |      |          |
|--------|--------------------------------------------------------------------------------------------------------------------------------------|-------|----|----|--------|-----|------|----------|
| Q9NR12 | PDZ and LIM domain protein 7 OS=Homo sapiens<br>GN=PDLIM7 PE=1 SV=1 - [PDLI7_HUMAN]                                                  | 10.28 | 4  | 7  | 49.81  | 8.4 | 0.64 | 1.19E-03 |
| H3BRS3 | Telomere length regulation protein TEL2 homolog<br>OS=Homo sapiens GN=TELO2 PE=1 SV=1 -<br>[H3BRS3_HUMAN]                            | 4.46  | 1  | 1  | 47.35  | 8.4 | 0.64 | 3.05E-04 |
| E5RGT6 | F-BAR and double SH3 domains protein 1 OS=Homo<br>sapiens GN=FCHSD1 PE=1 SV=1 - [E5RGT6_HUMAN]                                       | 3.18  | 2  | 3  | 66.57  | 5.1 | 0.64 | 6.48E-04 |
| Q6MZU1 | Putative uncharacterized protein DKFZp686A1195<br>OS=Homo sapiens GN=DKFZp686A1195 PE=2 SV=1 -<br>[Q6MZU1_HUMAN]                     | 9.34  | 11 | 17 | 189.50 | 6.8 | 0.64 | 5.80E-04 |
| Q86UX7 | Fermitin family homolog 3 OS=Homo sapiens GN=FERMT3<br>PE=1 SV=1 - [URP2_HUMAN]                                                      | 4.35  | 2  | 2  | 75.91  | 7.0 | 0.64 | 8.30E-03 |
| B4DMT5 | Eukaryotic translation initiation factor 3 subunit F OS=Homo<br>sapiens GN=EIF3F PE=2 SV=1 - [B4DMT5_HUMAN]                          | 31.27 | 8  | 14 | 33.22  | 5.6 | 0.64 | 1.04E-03 |
| C9IZX9 | GTPase-activating protein and VPS9 domain-containing<br>protein 1 (Fragment) OS=Homo sapiens GN=GAPVD1<br>PE=1 SV=1 - [C9IZX9_HUMAN] | 15.38 | 1  | 1  | 13.41  | 8.5 | 0.64 | 1.21E-02 |
| B7Z1S8 | cDNA FLJ56059, highly similar to Engulfment and cell<br>motility protein 2 OS=Homo sapiens PE=2 SV=1 -<br>[B7Z1S8_HUMAN]             | 3.54  | 1  | 2  | 62.08  | 6.3 | 0.64 | 8.80E-03 |
| K7ERI9 | Apolipoprotein C-I (Fragment) OS=Homo sapiens<br>GN=APOC1 PE=1 SV=1 - [K7ERI9_HUMAN]                                                 | 35.06 | 4  | 12 | 8.64   | 6.7 | 0.64 | 6.57E-04 |
| K7ES11 | (E3-independent) E2 ubiquitin-conjugating enzyme<br>(Fragment) OS=Homo sapiens GN=UBE2O PE=1 SV=1 -<br>[K7ES11_HUMAN]                | 2.6   | 1  | 1  | 88.81  | 5.0 | 0.64 | 2.56E-04 |
| Q99536 | Synaptic vesicle membrane protein VAT-1 homolog<br>OS=Homo sapiens GN=VAT1 PE=1 SV=2 -<br>[VAT1_HUMAN]                               | 36.64 | 10 | 21 | 41.89  | 6.3 | 0.64 | 1.90E-02 |

|            |                                                                                                                                        |       |    |     |        |     |      |          |
|------------|----------------------------------------------------------------------------------------------------------------------------------------|-------|----|-----|--------|-----|------|----------|
| P42025     | Beta-actin OS=Homo sapiens GN=ACTR1B PE=1 SV=1 - [ACTY_HUMAN]                                                                          | 21.81 | 3  | 13  | 42.27  | 6.4 | 0.64 | 1.12E-03 |
| P10301     | Ras-related protein R-Ras OS=Homo sapiens GN=RRAS PE=1 SV=1 - [RRAS_HUMAN]                                                             | 29.36 | 4  | 11  | 23.47  | 6.9 | 0.64 | 1.88E-02 |
| P60866     | 40S ribosomal protein S20 OS=Homo sapiens GN=RPS20 PE=1 SV=1 - [RS20_HUMAN]                                                            | 25.21 | 3  | 10  | 13.36  | 9.9 | 0.64 | 5.19E-05 |
| Q86WG5     | Myotubularin-related protein 13 OS=Homo sapiens GN=SBF2 PE=1 SV=1 - [MTMRD_HUMAN]                                                      | 2.87  | 4  | 4   | 208.33 | 7.1 | 0.64 | 9.28E-03 |
| B4DPR2     | cDNA FLJ50830, highly similar to Serum albumin OS=Homo sapiens PE=2 SV=1 - [B4DPR2_HUMAN]                                              | 75.33 | 1  | 869 | 59.54  | 7.2 | 0.64 | 3.65E-03 |
| Q6ZQQ6     | WD repeat-containing protein 87 OS=Homo sapiens GN=WDR87 PE=1 SV=3 - [WDR87_HUMAN]                                                     | 0.28  | 1  | 1   | 332.97 | 7.3 | 0.64 | 3.85E-05 |
| A0A024R8B1 | TBC1 domain family, member 13, isoform CRA_b OS=Homo sapiens GN=TBC1D13 PE=4 SV=1 - [A0A024R8B1_HUMAN]                                 | 6.18  | 1  | 1   | 32.15  | 5.6 | 0.65 | 1.36E-02 |
| B3KM48     | cDNA FLJ10286 fis, clone HEMBB1001384, highly similar to COP9 signalosome complex subunit 4 OS=Homo sapiens PE=2 SV=1 - [B3KM48_HUMAN] | 15.02 | 5  | 5   | 46.23  | 5.8 | 0.65 | 2.82E-03 |
| Q13228     | Selenium-binding protein 1 OS=Homo sapiens GN=SELENBP1 PE=1 SV=2 - [SBP1_HUMAN]                                                        | 35.38 | 13 | 20  | 52.36  | 6.4 | 0.65 | 4.45E-04 |
| Q8WXI4     | Acyl-coenzyme A thioesterase 11 OS=Homo sapiens GN=ACOT11 PE=1 SV=1 - [ACO11_HUMAN]                                                    | 3.13  | 1  | 1   | 68.45  | 8.4 | 0.65 | 9.20E-03 |
| Q13347     | Eukaryotic translation initiation factor 3 subunit I OS=Homo sapiens GN=EIF3I PE=1 SV=1 - [EIF3I_HUMAN]                                | 17.23 | 6  | 9   | 36.48  | 5.6 | 0.65 | 1.56E-03 |



|            |                                                                                                                                                  |       |    |    |        |      |      |          |
|------------|--------------------------------------------------------------------------------------------------------------------------------------------------|-------|----|----|--------|------|------|----------|
| P04275     | von Willebrand factor OS=Homo sapiens GN=VWF PE=1 SV=4 - [VWF_HUMAN]                                                                             | 10.59 | 1  | 36 | 309.06 | 5.5  | 0.65 | 6.81E-03 |
| B2R5U1     | cDNA, FLJ92620, highly similar to Homo sapiens staphylococcal nuclease domain containing 1 (SND1), mRNA OS=Homo sapiens PE=2 SV=1 - [SND1_HUMAN] | 29.38 | 20 | 33 | 99.61  | 7.0  | 0.65 | 4.43E-03 |
| P25398     | 40S ribosomal protein S12 OS=Homo sapiens GN=RPS12 PE=1 SV=3 - [RS12_HUMAN]                                                                      | 53.79 | 7  | 21 | 14.51  | 7.2  | 0.65 | 1.54E-03 |
| B4DW31     | cDNA FLJ54186, highly similar to Nuclear receptor-binding protein OS=Homo sapiens PE=2 SV=1 - [B4DW31_HUMAN]                                     | 5.05  | 2  | 5  | 57.92  | 5.1  | 0.65 | 6.30E-04 |
| A0A0A0MSK5 | Torsin-1A-interacting protein 1 OS=Homo sapiens GN=TOR1AIP1 PE=1 SV=1 - [A0A0A0MSK5_HUMAN]                                                       | 14.07 | 6  | 10 | 52.37  | 7.1  | 0.65 | 1.73E-03 |
| Q8WUW1     | Protein BRICK1 OS=Homo sapiens GN=BRK1 PE=1 SV=1 - [BRK1_HUMAN]                                                                                  | 14.67 | 1  | 2  | 8.74   | 5.5  | 0.65 | 9.62E-03 |
| B3KPK3     | cDNA FLJ31895 fis, clone NT2RP7003680, highly similar to Kelch-like protein 4 OS=Homo sapiens PE=2 SV=1 - [B3KPK3_HUMAN]                         | 2.37  | 1  | 1  | 80.22  | 6.9  | 0.65 | 2.58E-02 |
| H0YN65     | Carbohydrate sulfotransferase 14 OS=Homo sapiens GN=CHST14 PE=1 SV=1 - [H0YN65_HUMAN]                                                            | 9.4   | 3  | 4  | 39.88  | 9.3  | 0.65 | 1.87E-03 |
| J3QR95     | E3 ubiquitin-protein ligase MIB2 (Fragment) OS=Homo sapiens GN=MIB2 PE=1 SV=1 - [J3QR95_HUMAN]                                                   | 5.72  | 1  | 1  | 34.75  | 7.6  | 0.65 | 3.58E-02 |
| P62750     | 60S ribosomal protein L23a OS=Homo sapiens GN=RPL23A PE=1 SV=1 - [RL23A_HUMAN]                                                                   | 31.41 | 5  | 13 | 17.68  | 10.4 | 0.65 | 7.46E-03 |
| P60228     | Eukaryotic translation initiation factor 3 subunit E OS=Homo sapiens GN=EIF3E PE=1 SV=1 - [EIF3E_HUMAN]                                          | 26.29 | 11 | 18 | 52.19  | 6.0  | 0.65 | 1.78E-04 |

|            |                                                                                                                                |       |    |     |        |     |      |          |
|------------|--------------------------------------------------------------------------------------------------------------------------------|-------|----|-----|--------|-----|------|----------|
| Q96F85     | CB1 cannabinoid receptor-interacting protein 1 OS=Homo sapiens GN=CNRIP1 PE=1 SV=1 - [CNRIP1_HUMAN]                            | 25    | 3  | 3   | 18.64  | 7.9 | 0.65 | 3.61E-04 |
| A0A0B4J203 | Uncharacterized protein OS=Homo sapiens PE=3 SV=1 - [A0A0B4J203_HUMAN]                                                         | 3.18  | 2  | 2   | 94.64  | 5.0 | 0.65 | 4.90E-02 |
| A0A024R5L7 | Phosphatidylinositol binding clathrin assembly protein, isoform CRA_c OS=Homo sapiens GN=PICALM PE=4 SV=1 - [A0A024R5L7_HUMAN] | 6.07  | 3  | 4   | 66.35  | 8.8 | 0.65 | 5.68E-03 |
| B4DPX8     | cDNA FLJ58776, highly similar to Nidogen-2 OS=Homo sapiens PE=2 SV=1 - [B4DPX8_HUMAN]                                          | 17.89 | 7  | 11  | 62.14  | 5.8 | 0.65 | 2.89E-04 |
| O75531     | Barrier-to-autointegration factor OS=Homo sapiens GN=BANF1 PE=1 SV=1 - [BAF_HUMAN]                                             | 57.3  | 4  | 17  | 10.05  | 6.1 | 0.65 | 7.50E-04 |
| Q9BTV4     | Transmembrane protein 43 OS=Homo sapiens GN=TMEM43 PE=1 SV=1 - [TMM43_HUMAN]                                                   | 49.5  | 4  | 62  | 44.85  | 8.1 | 0.65 | 1.34E-02 |
| B4DTY8     | cDNA FLJ61587, highly similar to Integrin alpha-1 (Fragment) OS=Homo sapiens PE=2 SV=1 - [B4DTY8_HUMAN]                        | 6.39  | 8  | 9   | 129.92 | 6.2 | 0.65 | 2.62E-02 |
| P21399     | Cytoplasmic aconitate hydratase OS=Homo sapiens GN=ACO1 PE=1 SV=3 - [ACOC_HUMAN]                                               | 13.27 | 10 | 13  | 98.34  | 6.7 | 0.65 | 6.04E-03 |
| Q15435     | Protein phosphatase 1 regulatory subunit 7 OS=Homo sapiens GN=PPP1R7 PE=1 SV=1 - [PP1R7_HUMAN]                                 | 10.83 | 3  | 3   | 41.54  | 4.9 | 0.65 | 8.83E-03 |
| G3V1N2     | HCG1745306, isoform CRA_a OS=Homo sapiens GN=HBA2 PE=1 SV=1 - [G3V1N2_HUMAN]                                                   | 67.27 | 1  | 105 | 11.94  | 8.8 | 0.65 | 4.52E-04 |
| B7Z4C3     | cDNA FLJ50805, highly similar to Erythrocyte membrane protein band 4.2 OS=Homo sapiens PE=2 SV=1 - [B7Z4C3_HUMAN]              | 18.09 | 10 | 19  | 76.99  | 8.2 | 0.65 | 1.07E-03 |

|            |                                                                                                                                                                  |       |   |    |        |     |      |          |
|------------|------------------------------------------------------------------------------------------------------------------------------------------------------------------|-------|---|----|--------|-----|------|----------|
| B4DVZ0     | cDNA FLJ50253, highly similar to Heat shock 70 kDa protein 12B OS=Homo sapiens PE=2 SV=1 - [B4DVZ0_HUMAN]                                                        | 6.67  | 2 | 5  | 66.77  | 9.0 | 0.65 | 9.92E-04 |
| A0A024RBH7 | Thymopoietin, isoform CRA_a OS=Homo sapiens GN=TMPO PE=4 SV=1 - [A0A024RBH7_HUMAN]                                                                               | 16.23 | 2 | 7  | 38.71  | 9.2 | 0.65 | 3.29E-04 |
| K7ES31     | Eukaryotic translation initiation factor 3 subunit K OS=Homo sapiens GN=EIF3K PE=1 SV=1 - [K7ES31_HUMAN]                                                         | 20.44 | 2 | 4  | 15.86  | 6.7 | 0.65 | 5.63E-03 |
| B4DPP8     | cDNA FLJ53075, highly similar to Kininogen-1 OS=Homo sapiens PE=2 SV=1 - [B4DPP8_HUMAN]                                                                          | 22.17 | 8 | 11 | 46.47  | 6.4 | 0.65 | 3.84E-03 |
| A8K9D8     | cDNA FLJ78129, highly similar to Homo sapiens reversion-inducing-cysteine-rich protein with kazal motifs (RECK), mRNA OS=Homo sapiens PE=2 SV=1 - [A8K9D8_HUMAN] | 6.9   | 5 | 5  | 106.39 | 6.7 | 0.66 | 5.74E-03 |
| B4DJ12     | cDNA FLJ58355, highly similar to Tyrosine-protein phosphatase non-receptor type 23 (EC 3.1.3.48) OS=Homo sapiens PE=2 SV=1 - [B4DJ12_HUMAN]                      | 7.02  | 5 | 7  | 139.24 | 6.6 | 0.66 | 6.16E-03 |
| Q9H6T3     | RNA polymerase II-associated protein 3 OS=Homo sapiens GN=RPAP3 PE=1 SV=2 - [RPAP3_HUMAN]                                                                        | 1.8   | 1 | 1  | 75.67  | 6.8 | 0.66 | 1.30E-02 |
| P35241     | Radixin OS=Homo sapiens GN=RDX PE=1 SV=1 - [RADI_HUMAN]                                                                                                          | 29.67 | 8 | 43 | 68.52  | 6.4 | 0.66 | 5.94E-04 |
| B4DX05     | cDNA FLJ55948, highly similar to HECT domain and RCC1-like domain-containing protein 5 OS=Homo sapiens PE=2 SV=1 - [B4DX05_HUMAN]                                | 2.1   | 1 | 1  | 50.57  | 5.5 | 0.66 | 3.53E-03 |
| P49675     | Steroidogenic acute regulatory protein, mitochondrial OS=Homo sapiens GN=STAR PE=1 SV=2 - [STAR_HUMAN]                                                           | 37.19 | 8 | 20 | 31.89  | 9.0 | 0.66 | 2.54E-04 |
| Q9Y2V2     | Calcium-regulated heat-stable protein 1 OS=Homo sapiens GN=CARHSP1 PE=1 SV=2 - [CHSP1_HUMAN]                                                                     | 10.88 | 1 | 10 | 15.88  | 8.2 | 0.66 | 7.64E-03 |

|        |                                                                                                                                              |       |   |    |        |     |      |          |
|--------|----------------------------------------------------------------------------------------------------------------------------------------------|-------|---|----|--------|-----|------|----------|
| P04632 | Calpain small subunit 1 OS=Homo sapiens GN=CAPNS1 PE=1 SV=1 - [CPNS1_HUMAN]                                                                  | 32.09 | 7 | 16 | 28.30  | 5.2 | 0.66 | 1.22E-03 |
| Q99733 | Nucleosome assembly protein 1-like 4 OS=Homo sapiens GN=NAP1L4 PE=1 SV=1 - [NP1L4_HUMAN]                                                     | 22.93 | 7 | 11 | 42.80  | 4.7 | 0.66 | 5.38E-03 |
| D6RDN9 | [Pyruvate dehydrogenase (acetyl-transferring)] kinase isozyme 2, mitochondrial (Fragment) OS=Homo sapiens GN=PDK2 PE=1 SV=1 - [D6RDN9_HUMAN] | 23.55 | 3 | 8  | 29.37  | 5.8 | 0.66 | 4.87E-02 |
| Q9UN75 | Protocadherin alpha-12 OS=Homo sapiens GN=PCDHA12 PE=2 SV=1 - [PCDAC_HUMAN]                                                                  | 1.49  | 1 | 1  | 101.59 | 5.3 | 0.66 | 3.71E-03 |
| Q49A62 | AMT protein OS=Homo sapiens GN=AMT PE=2 SV=1 - [Q49A62_HUMAN]                                                                                | 14.81 | 3 | 4  | 28.83  | 8.7 | 0.66 | 1.26E-02 |
| Q99969 | Retinoic acid receptor responder protein 2 OS=Homo sapiens GN=RARRES2 PE=1 SV=1 - [RARR2_HUMAN]                                              | 14.11 | 2 | 4  | 18.61  | 9.1 | 0.66 | 5.04E-03 |
| A4FVA8 | DFNA5 protein (Fragment) OS=Homo sapiens GN=DFNA5 PE=2 SV=1 - [A4FVA8_HUMAN]                                                                 | 5.26  | 1 | 2  | 47.70  | 5.2 | 0.66 | 1.07E-02 |
| G3V5L7 | Protein NDRG2 (Fragment) OS=Homo sapiens GN=NDRG2 PE=1 SV=1 - [G3V5L7_HUMAN]                                                                 | 35.32 | 4 | 5  | 24.12  | 4.8 | 0.66 | 1.34E-03 |
| B3KWQ6 | cDNA FLJ43599 fis, clone SMINT2017781, highly similar to PERIPHERIN OS=Homo sapiens PE=2 SV=1 - [B3KWQ6_HUMAN]                               | 10.43 | 2 | 16 | 53.65  | 5.5 | 0.66 | 1.56E-02 |
| F8W8H5 | Ras-related protein Rab-24 OS=Homo sapiens GN=RAB24 PE=1 SV=1 - [F8W8H5_HUMAN]                                                               | 5.17  | 1 | 1  | 19.66  | 5.4 | 0.66 | 7.77E-03 |
| Q96CA8 | CDC2L2 protein (Fragment) OS=Homo sapiens GN=CDC2L2 PE=2 SV=1 - [Q96CA8_HUMAN]                                                               | 2.16  | 1 | 1  | 52.37  | 5.1 | 0.66 | 3.34E-02 |

|            |                                                                                                                          |       |    |    |        |     |      |          |
|------------|--------------------------------------------------------------------------------------------------------------------------|-------|----|----|--------|-----|------|----------|
| B4E2V5     | cDNA FLJ52062, highly similar to Erythrocyte band 7 integral membrane protein OS=Homo sapiens PE=2 SV=1 - [B4E2V5_HUMAN] | 33.33 | 7  | 14 | 25.95  | 7.4 | 0.66 | 7.03E-03 |
| P36871     | Phosphoglucomutase-1 OS=Homo sapiens GN=PGM1 PE=1 SV=3 - [PGM1_HUMAN]                                                    | 32.74 | 15 | 32 | 61.41  | 6.8 | 0.66 | 1.52E-04 |
| A0A087WTT6 | 40S ribosomal protein S29 OS=Homo sapiens GN=RPS29 PE=1 SV=1 - [A0A087WTT6_HUMAN]                                        | 13.21 | 1  | 2  | 6.11   | 9.1 | 0.66 | 3.27E-03 |
| P62070     | Ras-related protein R-Ras2 OS=Homo sapiens GN=RRAS2 PE=1 SV=1 - [RRAS2_HUMAN]                                            | 18.63 | 2  | 7  | 23.38  | 6.0 | 0.66 | 6.54E-03 |
| Q86TY5     | Galectin OS=Homo sapiens PE=2 SV=1 - [Q86TY5_HUMAN]                                                                      | 52.89 | 6  | 12 | 13.89  | 9.2 | 0.66 | 2.45E-03 |
| O14828     | Secretory carrier-associated membrane protein 3 OS=Homo sapiens GN=SCAMP3 PE=1 SV=3 - [SCAM3_HUMAN]                      | 5.76  | 2  | 4  | 38.26  | 7.6 | 0.66 | 3.27E-02 |
| O75369     | Filamin-B OS=Homo sapiens GN=FLNB PE=1 SV=2 - [FLNB_HUMAN]                                                               | 26.59 | 44 | 95 | 277.99 | 5.7 | 0.66 | 5.36E-03 |
| A8K2Q6     | Peptidyl-prolyl cis-trans isomerase OS=Homo sapiens PE=2 SV=1 - [A8K2Q6_HUMAN]                                           | 9.91  | 2  | 3  | 22.70  | 8.4 | 0.66 | 4.29E-02 |
| B8ZZZ7     | DNA polymerase-transactivated protein 6, isoform CRA_b OS=Homo sapiens GN=SPATS2L PE=1 SV=1 - [B8ZZZ7_HUMAN]             | 4.22  | 2  | 2  | 54.91  | 9.7 | 0.66 | 2.30E-03 |
| Q04721     | Neurogenic locus notch homolog protein 2 OS=Homo sapiens GN=NOTCH2 PE=1 SV=3 - [NOTC2_HUMAN]                             | 0.89  | 2  | 2  | 265.23 | 5.1 | 0.66 | 6.98E-03 |
| P37837     | Transaldolase OS=Homo sapiens GN=TALDO1 PE=1 SV=2 - [TALDO_HUMAN]                                                        | 36.5  | 13 | 29 | 37.52  | 6.8 | 0.66 | 3.52E-03 |

|            |                                                                                                                                                 |       |    |    |        |     |      |          |
|------------|-------------------------------------------------------------------------------------------------------------------------------------------------|-------|----|----|--------|-----|------|----------|
| Q9P000     | COMM domain-containing protein 9 OS=Homo sapiens<br>GN=COMM9 PE=1 SV=2 - [COMD9_HUMAN]                                                          | 11.62 | 1  | 1  | 21.81  | 5.9 | 0.67 | 4.56E-02 |
| P43652     | Afamin OS=Homo sapiens GN=AFM PE=1 SV=1 -<br>[AFAM_HUMAN]                                                                                       | 5.34  | 4  | 4  | 69.02  | 5.9 | 0.67 | 8.48E-04 |
| B3KWX2     | cDNA FLJ44075 fis, clone TEST14038339, highly similar to<br>Disco-interacting protein 2 homolog C OS=Homo sapiens<br>PE=2 SV=1 - [B3KWX2_HUMAN] | 1.37  | 1  | 1  | 71.31  | 7.6 | 0.67 | 3.44E-03 |
| S6AWF4     | IgG L chain OS=Homo sapiens PE=2 SV=1 -<br>[S6AWF4_HUMAN]                                                                                       | 23.89 | 1  | 16 | 19.83  | 7.1 | 0.67 | 8.55E-04 |
| A0A0D9SG72 | Syntaxin-binding protein 1 OS=Homo sapiens GN=STXBP1<br>PE=1 SV=2 - [A0A0D9SG72_HUMAN]                                                          | 21.72 | 7  | 11 | 66.12  | 6.8 | 0.67 | 1.79E-03 |
| A0A0K0Q2Z1 | Serpin peptidase inhibitor clade C member 1 OS=Homo<br>sapiens GN=SERPINC1 PE=2 SV=1 -<br>[A0A0K0Q2Z1_HUMAN]                                    | 34.48 | 14 | 28 | 52.51  | 6.7 | 0.67 | 1.59E-03 |
| K7EMP1     | Coiled-coil and C2 domain-containing protein 1A (Fragment)<br>OS=Homo sapiens GN=CC2D1A PE=1 SV=1 -<br>[K7EMP1_HUMAN]                           | 3.95  | 1  | 1  | 45.93  | 9.7 | 0.67 | 2.05E-02 |
| P53618     | Coatomer subunit beta OS=Homo sapiens GN=COPB1<br>PE=1 SV=3 - [COPB_HUMAN]                                                                      | 32.21 | 23 | 35 | 107.07 | 6.0 | 1.50 | 7.25E-04 |
| Q9BW30     | Tubulin polymerization-promoting protein family member 3<br>OS=Homo sapiens GN=TPPP3 PE=1 SV=1 -<br>[TPPP3_HUMAN]                               | 9.09  | 1  | 1  | 18.97  | 9.1 | 1.50 | 2.89E-03 |
| Q96DP5     | Methionyl-tRNA formyltransferase, mitochondrial OS=Homo<br>sapiens GN=MTFMT PE=1 SV=2 - [FMT_HUMAN]                                             | 5.4   | 2  | 2  | 43.80  | 9.7 | 1.50 | 1.15E-04 |
| O76031     | ATP-dependent Clp protease ATP-binding subunit clpX-like,<br>mitochondrial OS=Homo sapiens GN=CLPX PE=1 SV=2 -<br>[CLPX_HUMAN]                  | 35.23 | 20 | 42 | 69.18  | 7.6 | 1.50 | 6.06E-03 |

|            |                                                                                                                               |       |    |    |        |      |      |          |
|------------|-------------------------------------------------------------------------------------------------------------------------------|-------|----|----|--------|------|------|----------|
| Q9BZQ6     | ER degradation-enhancing alpha-mannosidase-like protein 3 OS=Homo sapiens GN=EDEM3 PE=1 SV=2 - [EDEM3_HUMAN]                  | 9.12  | 7  | 11 | 104.60 | 4.9  | 1.50 | 1.66E-02 |
| A0A0S2Z5K6 | SIL1-like protein endoplasmic reticulum chaperone isoform 2 (Fragment) OS=Homo sapiens GN=SIL1 PE=2 SV=1 - [A0A0S2Z5K6_HUMAN] | 9.82  | 3  | 6  | 44.49  | 5.4  | 1.50 | 7.09E-03 |
| B3KUJ7     | cDNA FLJ40064 fis, clone TESOP2000312, highly similar to LAS1-like protein OS=Homo sapiens PE=2 SV=1 - [B3KUJ7_HUMAN]         | 3.05  | 1  | 1  | 34.18  | 5.2  | 1.50 | 2.08E-02 |
| P82914     | 28S ribosomal protein S15, mitochondrial OS=Homo sapiens GN=MRPS15 PE=1 SV=1 - [RT15_HUMAN]                                   | 33.07 | 10 | 20 | 29.82  | 10.5 | 1.50 | 7.14E-03 |
| Q5EBM0     | UMP-CMP kinase 2, mitochondrial OS=Homo sapiens GN=CMPK2 PE=1 SV=3 - [CMPK2_HUMAN]                                            | 21.83 | 8  | 10 | 49.42  | 7.0  | 1.50 | 1.37E-02 |
| Q9P0I2     | ER membrane protein complex subunit 3 OS=Homo sapiens GN=EMC3 PE=1 SV=3 - [EMC3_HUMAN]                                        | 20.31 | 5  | 8  | 29.93  | 6.8  | 1.50 | 5.27E-03 |
| A0A024RD07 | Trinucleotide repeat containing 5, isoform CRA_c OS=Homo sapiens GN=TNRC5 PE=4 SV=1 - [A0A024RD07_HUMAN]                      | 19.78 | 6  | 12 | 30.75  | 5.5  | 1.51 | 1.36E-02 |
| Q9BPW8     | Protein NipSnap homolog 1 OS=Homo sapiens GN=NIPSNAP1 PE=1 SV=1 - [NIPS1_HUMAN]                                               | 44.72 | 10 | 33 | 33.29  | 9.3  | 1.51 | 1.65E-02 |
| Q8TBT6     | Putative uncharacterized protein (Fragment) OS=Homo sapiens PE=2 SV=1 - [Q8TBT6_HUMAN]                                        | 27.3  | 6  | 69 | 34.47  | 8.9  | 1.51 | 1.75E-02 |
| P11177     | Pyruvate dehydrogenase E1 component subunit beta, mitochondrial OS=Homo sapiens GN=PDHB PE=1 SV=3 - [ODPB_HUMAN]              | 52.92 | 14 | 79 | 39.21  | 6.7  | 1.51 | 3.25E-03 |
| O94919     | Endonuclease domain-containing 1 protein OS=Homo sapiens GN=ENDOD1 PE=1 SV=2 - [ENDD1_HUMAN]                                  | 10.2  | 4  | 13 | 54.98  | 5.7  | 1.51 | 3.89E-03 |

|        |                                                                                                                                                   |       |    |    |       |     |      |          |
|--------|---------------------------------------------------------------------------------------------------------------------------------------------------|-------|----|----|-------|-----|------|----------|
| Q9Y617 | Phosphoserine aminotransferase OS=Homo sapiens<br>GN=PSAT1 PE=1 SV=2 - [SERC_HUMAN]                                                               | 30.27 | 10 | 15 | 40.40 | 7.7 | 1.51 | 1.15E-02 |
| A8KA41 | cDNA FLJ75060, highly similar to Homo sapiens 2'-5'-<br>oligoadenylate synthetase 2, 69/71kDa, mRNA OS=Homo<br>sapiens PE=2 SV=1 - [A8KA41_HUMAN] | 17.47 | 13 | 26 | 78.77 | 7.9 | 1.51 | 4.42E-03 |
| E9PKG6 | Nucleobindin-2 OS=Homo sapiens GN=NUCB2 PE=1 SV=2<br>- [E9PKG6_HUMAN]                                                                             | 41.42 | 11 | 26 | 40.34 | 5.2 | 1.51 | 1.45E-04 |
| H0YG77 | Transmembrane protein 120B (Fragment) OS=Homo<br>sapiens GN=TMEM120B PE=1 SV=1 - [H0YG77_HUMAN]                                                   | 5.67  | 1  | 2  | 29.02 | 9.3 | 1.51 | 1.41E-02 |
| J3KSH0 | StAR-related lipid transfer protein 3 (Fragment) OS=Homo<br>sapiens GN=STARD3 PE=1 SV=1 - [J3KSH0_HUMAN]                                          | 10.81 | 1  | 1  | 12.81 | 9.5 | 1.51 | 1.25E-02 |
| E7D7X9 | Proline-5-carboxylate reductase OS=Homo sapiens PE=2<br>SV=1 - [E7D7X9_HUMAN]                                                                     | 42.95 | 8  | 23 | 33.37 | 7.6 | 1.51 | 2.95E-03 |
| Q9UES0 | SNARE protein Ykt6 (Fragment) OS=Homo sapiens PE=2<br>SV=1 - [Q9UES0_HUMAN]                                                                       | 20.94 | 5  | 7  | 21.59 | 6.6 | 1.51 | 2.75E-03 |
| Q14554 | Protein disulfide-isomerase A5 OS=Homo sapiens<br>GN=PDIA5 PE=1 SV=1 - [PDIA5_HUMAN]                                                              | 26.59 | 12 | 25 | 59.56 | 7.9 | 1.51 | 1.21E-02 |
| E9PGN6 | rRNA methyltransferase 2, mitochondrial OS=Homo sapiens<br>GN=MRM2 PE=1 SV=1 - [E9PGN6_HUMAN]                                                     | 11.18 | 2  | 2  | 16.92 | 8.3 | 1.51 | 6.41E-05 |
| O00116 | Alkyldihydroxyacetonephosphate synthase, peroxisomal<br>OS=Homo sapiens GN=AGPS PE=1 SV=1 -<br>[ADAS_HUMAN]                                       | 34.04 | 15 | 36 | 72.87 | 7.3 | 1.51 | 5.68E-03 |
| P12532 | Creatine kinase U-type, mitochondrial OS=Homo sapiens<br>GN=CKMT1A PE=1 SV=1 - [KCRU_HUMAN]                                                       | 23.5  | 5  | 23 | 47.01 | 8.3 | 1.51 | 5.20E-03 |



|        |                                                                                                                        |       |    |     |        |     |      |          |
|--------|------------------------------------------------------------------------------------------------------------------------|-------|----|-----|--------|-----|------|----------|
| Q5GFL6 | von Willebrand factor A domain-containing protein 2<br>OS=Homo sapiens GN=VWA2 PE=1 SV=1 -<br>[VWA2_HUMAN]             | 2.52  | 1  | 1   | 81.96  | 8.0 | 1.51 | 1.04E-02 |
| Q15813 | Tubulin-specific chaperone E OS=Homo sapiens GN=TBCE<br>PE=1 SV=1 - [TBCE_HUMAN]                                       | 1.71  | 1  | 1   | 59.31  | 6.8 | 1.52 | 8.08E-03 |
| B4DL56 | Polypeptide N-acetylgalactosaminyltransferase OS=Homo<br>sapiens PE=2 SV=1 - [B4DL56_HUMAN]                            | 10.28 | 4  | 4   | 68.83  | 8.3 | 1.52 | 2.14E-02 |
| Q6AW98 | Putative uncharacterized protein DKFZp686P13170<br>OS=Homo sapiens GN=DKFZp686P13170 PE=2 SV=1 -<br>[Q6AW98_HUMAN]     | 1.74  | 1  | 1   | 46.00  | 9.9 | 1.52 | 9.82E-03 |
| Q9H490 | Phosphatidylinositol glycan anchor biosynthesis class U<br>protein OS=Homo sapiens GN=PIGU PE=1 SV=3 -<br>[PIGU_HUMAN] | 7.13  | 3  | 4   | 50.02  | 7.7 | 1.52 | 4.91E-03 |
| P13073 | Cytochrome c oxidase subunit 4 isoform 1, mitochondrial<br>OS=Homo sapiens GN=COX4I1 PE=1 SV=1 -<br>[COX41_HUMAN]      | 36.09 | 7  | 48  | 19.56  | 9.5 | 1.52 | 4.37E-03 |
| P49411 | Elongation factor Tu, mitochondrial OS=Homo sapiens<br>GN=TUFM PE=1 SV=2 - [EFTU_HUMAN]                                | 63.27 | 29 | 251 | 49.51  | 7.6 | 1.52 | 2.10E-03 |
| Q96CU9 | FAD-dependent oxidoreductase domain-containing protein<br>1 OS=Homo sapiens GN=FOXRED1 PE=1 SV=2 -<br>[FXRD1_HUMAN]    | 21.19 | 7  | 12  | 53.78  | 7.8 | 1.52 | 3.87E-03 |
| O00411 | DNA-directed RNA polymerase, mitochondrial OS=Homo<br>sapiens GN=POLRMT PE=1 SV=2 - [RPOM_HUMAN]                       | 11.79 | 11 | 17  | 138.53 | 9.0 | 1.52 | 3.34E-04 |
| Q6QN92 | Mitochondrial glycine cleavage system H-protein (Fragment)<br>OS=Homo sapiens PE=2 SV=1 - [Q6QN92_HUMAN]               | 24    | 2  | 13  | 13.80  | 4.3 | 1.52 | 2.88E-03 |
| H7BXL1 | Transmembrane protein 41A OS=Homo sapiens<br>GN=TMEM41A PE=1 SV=1 - [H7BXL1_HUMAN]                                     | 23.91 | 2  | 2   | 10.43  | 9.0 | 1.52 | 1.31E-03 |

|            |                                                                                                                                                                      |       |    |     |        |     |      |          |
|------------|----------------------------------------------------------------------------------------------------------------------------------------------------------------------|-------|----|-----|--------|-----|------|----------|
| B4DWN1     | cDNA FLJ52285, highly similar to Vesicular integral-membrane protein VIP36 OS=Homo sapiens PE=2 SV=1 - [B4DWN1_HUMAN]                                                | 61.4  | 14 | 46  | 32.56  | 6.5 | 1.52 | 1.37E-02 |
| P30084     | Enoyl-CoA hydratase, mitochondrial OS=Homo sapiens GN=ECHS1 PE=1 SV=4 - [ECHM_HUMAN]                                                                                 | 75.86 | 19 | 156 | 31.37  | 8.1 | 1.52 | 3.56E-03 |
| Q99757     | Thioredoxin, mitochondrial OS=Homo sapiens GN=TXN2 PE=1 SV=2 - [THIOM_HUMAN]                                                                                         | 36.75 | 3  | 18  | 18.37  | 8.3 | 1.52 | 5.11E-03 |
| Q9BZF1     | Oxysterol-binding protein-related protein 8 OS=Homo sapiens GN=OSBPL8 PE=1 SV=3 - [OSBL8_HUMAN]                                                                      | 9.45  | 8  | 10  | 101.13 | 7.0 | 1.52 | 1.31E-03 |
| Q8TEM1     | Nuclear pore membrane glycoprotein 210 OS=Homo sapiens GN=NUP210 PE=1 SV=3 - [PO210_HUMAN]                                                                           | 13.14 | 19 | 30  | 204.98 | 6.8 | 1.53 | 1.39E-02 |
| B3KPG6     | cDNA FLJ31769 fis, clone NT2RI2007956, highly similar to Chondroitin sulfate glucuronyltransferase (EC 2.4.1.226) OS=Homo sapiens PE=2 SV=1 - [B3KPG6_HUMAN]         | 4.19  | 2  | 2   | 85.11  | 7.9 | 1.53 | 1.18E-02 |
| B4DHG3     | cDNA FLJ55329, highly similar to Procollagen-lysine,2-oxoglutarate5-dioxygenase 2 (EC 1.14.11.4) OS=Homo sapiens PE=2 SV=1 - [B4DHG3_HUMAN]                          | 13.37 | 8  | 8   | 81.09  | 6.7 | 1.53 | 1.14E-02 |
| A0A024R6B4 | Ectonucleoside triphosphate diphosphohydrolase 5, isoform CRA_c OS=Homo sapiens GN=ENTPD5 PE=3 SV=1 - [A0A024R6B4_HUMAN]                                             | 12.59 | 4  | 5   | 44.97  | 6.1 | 1.53 | 5.86E-04 |
| A0A024R8L7 | Acyl-coenzyme A oxidase OS=Homo sapiens GN=ACOX1 PE=3 SV=1 - [A0A024R8L7_HUMAN]                                                                                      | 29.85 | 14 | 23  | 74.64  | 7.6 | 1.53 | 3.40E-02 |
| Q8IXM3     | 39S ribosomal protein L41, mitochondrial OS=Homo sapiens GN=MRPL41 PE=1 SV=1 - [RM41_HUMAN]                                                                          | 38.69 | 5  | 9   | 15.37  | 9.6 | 1.53 | 3.78E-02 |
| A8KAK1     | cDNA FLJ77398, highly similar to Homo sapiens UDP-glucose ceramide glucosyltransferase-like 1, transcript variant 2, mRNA OS=Homo sapiens PE=2 SV=1 - [A8KAK1_HUMAN] | 30.24 | 34 | 77  | 174.90 | 5.5 | 1.53 | 7.27E-03 |

|        |                                                                                                                     |       |   |    |        |     |      |          |
|--------|---------------------------------------------------------------------------------------------------------------------|-------|---|----|--------|-----|------|----------|
| B7ZLX4 | PPP1R9A protein OS=Homo sapiens GN=PPP1R9A PE=2 SV=1 - [B7ZLX4_HUMAN]                                               | 0.92  | 1 | 1  | 122.35 | 5.1 | 1.53 | 6.74E-03 |
| Q96AA3 | Protein RFT1 homolog OS=Homo sapiens GN=RFT1 PE=1 SV=1 - [RFT1_HUMAN]                                               | 6.28  | 4 | 4  | 60.30  | 8.9 | 1.53 | 2.66E-02 |
| Q9NX00 | Transmembrane protein 160 OS=Homo sapiens GN=TMEM160 PE=1 SV=1 - [TM160_HUMAN]                                      | 10.64 | 2 | 3  | 19.65  | 8.0 | 1.53 | 2.98E-03 |
| Q659F8 | Putative uncharacterized protein DKFZp434F152 (Fragment) OS=Homo sapiens GN=DKFZp434F152 PE=2 SV=1 - [Q659F8_HUMAN] | 4.89  | 1 | 1  | 23.86  | 9.0 | 1.53 | 2.00E-02 |
| K7ERA3 | Synaptonemal complex protein SC65 (Fragment) OS=Homo sapiens GN=P3H4 PE=1 SV=1 - [K7ERA3_HUMAN]                     | 9.05  | 2 | 2  | 25.97  | 5.5 | 1.53 | 1.22E-02 |
| E9PIE4 | Mitochondrial carrier homolog 2 (Fragment) OS=Homo sapiens GN=MTCH2 PE=1 SV=8 - [E9PIE4_HUMAN]                      | 34.35 | 1 | 37 | 28.53  | 7.6 | 1.53 | 4.97E-03 |
| Q6ZNC8 | Lysophospholipid acyltransferase 1 OS=Homo sapiens GN=MBOAT1 PE=1 SV=1 - [MBOA1_HUMAN]                              | 2.83  | 1 | 1  | 56.52  | 9.2 | 1.53 | 4.32E-02 |
| Q9H4N9 | Clone CDABP0042 mRNA sequence OS=Homo sapiens PE=2 SV=1 - [Q9H4N9_HUMAN]                                            | 9.69  | 3 | 4  | 39.22  | 7.7 | 1.53 | 5.27E-03 |
| F5GYW6 | Exportin-T (Fragment) OS=Homo sapiens GN=XPOT PE=1 SV=1 - [F5GYW6_HUMAN]                                            | 15    | 1 | 2  | 6.92   | 4.7 | 1.53 | 1.07E-02 |
| Q04837 | Single-stranded DNA-binding protein, mitochondrial OS=Homo sapiens GN=SSBP1 PE=1 SV=1 - [SSBP_HUMAN]                | 55.41 | 7 | 78 | 17.25  | 9.6 | 1.53 | 1.88E-03 |
| Q9H2W6 | 39S ribosomal protein L46, mitochondrial OS=Homo sapiens GN=MRPL46 PE=1 SV=1 - [RM46_HUMAN]                         | 36.92 | 8 | 13 | 31.69  | 7.0 | 1.53 | 7.89E-03 |

|            |                                                                                                                                                                          |       |    |     |       |     |      |          |
|------------|--------------------------------------------------------------------------------------------------------------------------------------------------------------------------|-------|----|-----|-------|-----|------|----------|
| B4DYF9     | cDNA FLJ57669, highly similar to SWI/SNF-related matrix-associatedactin-dependent regulator of chromatin subfamily C member 1 OS=Homo sapiens PE=2 SV=1 - [B4DYF9_HUMAN] | 1.8   | 1  | 1   | 66.97 | 5.3 | 1.53 | 2.15E-02 |
| H3BMA1     | Mesothelin (Fragment) OS=Homo sapiens GN=MSLN PE=1 SV=2 - [H3BMA1_HUMAN]                                                                                                 | 13.47 | 4  | 8   | 37.65 | 6.0 | 1.53 | 2.68E-02 |
| O95202     | LETM1 and EF-hand domain-containing protein 1, mitochondrial OS=Homo sapiens GN=LETM1 PE=1 SV=1 - [LETM1_HUMAN]                                                          | 44.25 | 30 | 104 | 83.30 | 6.7 | 1.54 | 3.60E-03 |
| A0A087WVM4 | Monofunctional C1-tetrahydrofolate synthase, mitochondrial OS=Homo sapiens GN=MTHFD1L PE=1 SV=1 - [A0A087WVM4_HUMAN]                                                     | 25.52 | 19 | 33  | 99.25 | 7.3 | 1.54 | 1.06E-03 |
| A0A024R210 | Interferon induced transmembrane protein 1 (9-27), isoform CRA_a OS=Homo sapiens GN=IFITM1 PE=4 SV=1 - [A0A024R210_HUMAN]                                                | 27.2  | 2  | 9   | 13.93 | 7.9 | 1.54 | 3.77E-02 |
| Q8N5M1     | ATP synthase mitochondrial F1 complex assembly factor 2 OS=Homo sapiens GN=ATPAF2 PE=1 SV=1 - [ATPAF2_HUMAN]                                                             | 21.45 | 5  | 10  | 32.75 | 7.1 | 1.54 | 1.57E-04 |
| G3V2V6     | V-type proton ATPase subunit D OS=Homo sapiens GN=ATP6V1D PE=1 SV=1 - [G3V2V6_HUMAN]                                                                                     | 7.43  | 1  | 1   | 17.41 | 9.5 | 1.54 | 8.22E-04 |
| Q14249     | Endonuclease G, mitochondrial OS=Homo sapiens GN=ENDOG PE=1 SV=4 - [NUCG_HUMAN]                                                                                          | 7.74  | 2  | 2   | 32.60 | 9.5 | 1.54 | 3.16E-03 |
| Q9BXT2     | Voltage-dependent calcium channel gamma-6 subunit OS=Homo sapiens GN=CACNG6 PE=2 SV=1 - [CCG6_HUMAN]                                                                     | 2.69  | 1  | 1   | 28.11 | 9.2 | 1.54 | 3.35E-03 |
| O15270     | Serine palmitoyltransferase 2 OS=Homo sapiens GN=SPTLC2 PE=1 SV=1 - [SPTC2_HUMAN]                                                                                        | 19.4  | 8  | 12  | 62.88 | 7.8 | 1.54 | 1.68E-02 |
| A6PVJ3     | ERGIC and golgi 3 (Fragment) OS=Homo sapiens GN=ERGIC3 PE=4 SV=1 - [A6PVJ3_HUMAN]                                                                                        | 28    | 7  | 15  | 36.83 | 5.3 | 1.54 | 2.56E-02 |

|        |                                                                                                                |       |    |     |       |      |      |          |
|--------|----------------------------------------------------------------------------------------------------------------|-------|----|-----|-------|------|------|----------|
| P35270 | Sepiapterin reductase OS=Homo sapiens GN=SPR PE=1 SV=1 - [SPRE_HUMAN]                                          | 23.37 | 6  | 12  | 28.03 | 8.0  | 1.54 | 1.46E-04 |
| P09669 | Cytochrome c oxidase subunit 6C OS=Homo sapiens GN=COX6C PE=1 SV=2 - [COX6C_HUMAN]                             | 52    | 7  | 30  | 8.78  | 10.4 | 1.54 | 5.97E-03 |
| H7C0R6 | THUMP domain-containing protein 3 (Fragment) OS=Homo sapiens GN=THUMPD3 PE=1 SV=1 - [H7C0R6_HUMAN]             | 4.74  | 1  | 2   | 25.92 | 5.4  | 1.54 | 1.55E-03 |
| P49789 | Bis(5'-adenosyl)-triphosphatase OS=Homo sapiens GN=FHIT PE=1 SV=3 - [FHIT_HUMAN]                               | 27.89 | 3  | 5   | 16.85 | 7.1  | 1.54 | 6.88E-04 |
| B4DQ79 | Tyrosine-protein kinase OS=Homo sapiens PE=2 SV=1 - [B4DQ79_HUMAN]                                             | 20.33 | 5  | 12  | 48.53 | 7.4  | 1.54 | 3.74E-02 |
| B4DGC1 | cDNA FLJ59877, highly similar to LAG1 longevity assurance homolog 5 OS=Homo sapiens PE=2 SV=1 - [B4DGC1_HUMAN] | 3.59  | 1  | 1   | 22.23 | 9.2  | 1.54 | 4.61E-03 |
| Q02338 | D-beta-hydroxybutyrate dehydrogenase, mitochondrial OS=Homo sapiens GN=BDH1 PE=1 SV=3 - [BDH_HUMAN]            | 41.98 | 11 | 23  | 38.13 | 9.0  | 1.54 | 2.99E-03 |
| Q96B77 | Transmembrane protein 186 OS=Homo sapiens GN=TMEM186 PE=2 SV=1 - [TM186_HUMAN]                                 | 13.62 | 2  | 4   | 24.88 | 9.9  | 1.54 | 6.05E-03 |
| P21796 | Voltage-dependent anion-selective channel protein 1 OS=Homo sapiens GN=VDAC1 PE=1 SV=2 - [VDAC1_HUMAN]         | 81.27 | 17 | 431 | 30.75 | 8.5  | 1.55 | 4.97E-03 |
| Q9Y5M8 | Signal recognition particle receptor subunit beta OS=Homo sapiens GN=SRPRB PE=1 SV=3 - [SRPRB_HUMAN]           | 44.28 | 11 | 37  | 29.68 | 9.0  | 1.55 | 1.88E-02 |
| O43752 | Syntaxin-6 OS=Homo sapiens GN=STX6 PE=1 SV=1 - [STX6_HUMAN]                                                    | 9.8   | 1  | 1   | 29.16 | 4.9  | 1.55 | 1.96E-02 |

|        |                                                                                                                             |       |    |    |        |      |      |          |
|--------|-----------------------------------------------------------------------------------------------------------------------------|-------|----|----|--------|------|------|----------|
| B4DZ53 | cDNA FLJ59643, highly similar to Neutral alpha-glucosidase AB OS=Homo sapiens PE=2 SV=1 - [B4DZ53_HUMAN]                    | 38.03 | 1  | 94 | 96.47  | 6.0  | 1.55 | 7.98E-03 |
| O43402 | ER membrane protein complex subunit 8 OS=Homo sapiens GN=EMC8 PE=1 SV=1 - [EMC8_HUMAN]                                      | 25.24 | 4  | 10 | 23.76  | 6.4  | 1.55 | 1.65E-02 |
| Q9GZT3 | SRA stem-loop-interacting RNA-binding protein, mitochondrial OS=Homo sapiens GN=SLIRP PE=1 SV=1 - [SLIRP_HUMAN]             | 59.63 | 7  | 18 | 12.34  | 10.2 | 1.55 | 4.41E-03 |
| A8MXV4 | Nucleoside diphosphate-linked moiety X motif 19 OS=Homo sapiens GN=NUDT19 PE=1 SV=1 - [NUDT19_HUMAN]                        | 17.87 | 5  | 11 | 42.21  | 7.6  | 1.55 | 6.40E-03 |
| C9JBY7 | 28S ribosomal protein S33, mitochondrial OS=Homo sapiens GN=MRPS33 PE=1 SV=1 - [C9JBY7_HUMAN]                               | 21.88 | 2  | 3  | 11.45  | 10.2 | 1.55 | 6.00E-03 |
| P53701 | Cytochrome c-type heme lyase OS=Homo sapiens GN=HCCS PE=1 SV=1 - [CCHL_HUMAN]                                               | 23.13 | 5  | 9  | 30.58  | 6.7  | 1.55 | 3.06E-02 |
| Q8NCW5 | NAD(P)H-hydrate epimerase OS=Homo sapiens GN=NAXE PE=1 SV=2 - [NNRE_HUMAN]                                                  | 29.86 | 7  | 16 | 31.65  | 7.7  | 1.55 | 6.34E-03 |
| C9JE12 | Transmembrane and ubiquitin-like domain-containing protein 1 (Fragment) OS=Homo sapiens GN=TMUB1 PE=1 SV=1 - [C9JE12_HUMAN] | 14.47 | 2  | 2  | 16.11  | 4.9  | 1.55 | 8.97E-04 |
| P14406 | Cytochrome c oxidase subunit 7A2, mitochondrial OS=Homo sapiens GN=COX7A2 PE=1 SV=1 - [CX7A2_HUMAN]                         | 27.71 | 2  | 15 | 9.39   | 9.8  | 1.55 | 3.89E-02 |
| Q4KWH8 | 1-phosphatidylinositol 4,5-bisphosphate phosphodiesterase eta-1 OS=Homo sapiens GN=PLCH1 PE=1 SV=1 - [PLCH1_HUMAN]          | 0.47  | 1  | 11 | 189.10 | 7.7  | 1.55 | 1.87E-02 |
| Q9ULD0 | 2-oxoglutarate dehydrogenase-like, mitochondrial OS=Homo sapiens GN=OGDHL PE=1 SV=3 - [OGDHL_HUMAN]                         | 26.83 | 13 | 58 | 114.41 | 6.7  | 1.55 | 1.25E-03 |

|        |                                                                                                                                                                               |       |    |     |       |     |      |          |
|--------|-------------------------------------------------------------------------------------------------------------------------------------------------------------------------------|-------|----|-----|-------|-----|------|----------|
| B4DQ27 | cDNA FLJ59949, highly similar to Homo sapiens sulfatase modifying factor 2 (SUMF2), transcript variant 4, mRNA OS=Homo sapiens PE=2 SV=1 - [B4DQ27_HUMAN]                     | 37.5  | 1  | 12  | 25.83 | 6.8 | 1.55 | 6.70E-03 |
| Q5CAQ5 | Tumor rejection antigen (Gp96) 1 OS=Homo sapiens GN=TRA1 PE=2 SV=1 - [Q5CAQ5_HUMAN]                                                                                           | 58.35 | 44 | 375 | 92.28 | 4.9 | 1.55 | 4.72E-03 |
| P00966 | Argininosuccinate synthase OS=Homo sapiens GN=ASS1 PE=1 SV=2 - [ASSY_HUMAN]                                                                                                   | 19.42 | 7  | 9   | 46.50 | 8.0 | 1.55 | 9.17E-04 |
| O15228 | Dihydroxyacetone phosphate acyltransferase OS=Homo sapiens GN=GNPAT PE=1 SV=1 - [GNPAT_HUMAN]                                                                                 | 21.32 | 13 | 23  | 77.14 | 6.6 | 1.55 | 3.51E-03 |
| Q9H9P2 | Chondrolectin OS=Homo sapiens GN=CHODL PE=2 SV=2 - [CHODL_HUMAN]                                                                                                              | 2.56  | 1  | 1   | 30.41 | 6.8 | 1.55 | 9.42E-03 |
| Q9NVV4 | Poly(A) RNA polymerase, mitochondrial OS=Homo sapiens GN=MTPAP PE=1 SV=1 - [PAPD1_HUMAN]                                                                                      | 23.2  | 11 | 19  | 66.13 | 9.0 | 1.55 | 6.41E-03 |
| Q502X7 | Elongation of very long chain fatty acids protein OS=Homo sapiens GN=ELOVL1 PE=2 SV=1 - [Q502X7_HUMAN]                                                                        | 9.72  | 1  | 1   | 16.87 | 8.1 | 1.55 | 1.19E-02 |
| P46199 | Translation initiation factor IF-2, mitochondrial OS=Homo sapiens GN=MTIF2 PE=1 SV=2 - [IF2M_HUMAN]                                                                           | 26.27 | 14 | 33  | 81.27 | 7.2 | 1.55 | 4.69E-03 |
| Q96EL3 | 39S ribosomal protein L53, mitochondrial OS=Homo sapiens GN=MRPL53 PE=1 SV=1 - [RM53_HUMAN]                                                                                   | 43.75 | 4  | 9   | 12.10 | 8.8 | 1.55 | 5.88E-04 |
| A8K4L6 | Vang-like protein OS=Homo sapiens PE=2 SV=1 - [A8K4L6_HUMAN]                                                                                                                  | 7.1   | 4  | 9   | 59.72 | 9.2 | 1.56 | 8.10E-03 |
| B3KNK5 | cDNA FLJ14795 fis, clone NT2RP4001219, highly similar to Homo sapiens DnaJ (Hsp40) homolog, subfamily C, member 10 (DNAJC10), mRNA OS=Homo sapiens PE=2 SV=1 - [B3KNK5_HUMAN] | 23.88 | 1  | 23  | 68.92 | 7.8 | 1.56 | 5.28E-03 |

|        |                                                                                                                                                          |       |    |     |        |      |      |          |
|--------|----------------------------------------------------------------------------------------------------------------------------------------------------------|-------|----|-----|--------|------|------|----------|
| Q9NR09 | Baculoviral IAP repeat-containing protein 6 OS=Homo sapiens GN=BIRC6 PE=1 SV=2 - [BIRC6_HUMAN]                                                           | 0.45  | 1  | 10  | 529.92 | 6.0  | 1.56 | 7.73E-03 |
| O15143 | Actin-related protein 2/3 complex subunit 1B OS=Homo sapiens GN=ARPC1B PE=1 SV=3 - [ARC1B_HUMAN]                                                         | 21.51 | 7  | 13  | 40.92  | 8.4  | 1.56 | 3.13E-02 |
| P07237 | Protein disulfide-isomerase OS=Homo sapiens GN=P4HB PE=1 SV=3 - [PDIA1_HUMAN]                                                                            | 70.87 | 26 | 257 | 57.08  | 4.9  | 1.56 | 7.64E-03 |
| B3KVY9 | cDNA FLJ41755 fis, clone HSYRA2009102, highly similar to Adenosine 3'-phospho 5'-phosphosulfate transporter 1 OS=Homo sapiens PE=2 SV=1 - [B3KVY9_HUMAN] | 12.38 | 5  | 8   | 45.04  | 9.0  | 1.56 | 4.66E-03 |
| Q6FIF5 | Peroxisomal membrane protein 4 OS=Homo sapiens GN=PXMP4 PE=2 SV=1 - [Q6FIF5_HUMAN]                                                                       | 9.91  | 2  | 2   | 24.26  | 10.1 | 1.56 | 7.10E-04 |
| Q13405 | 39S ribosomal protein L49, mitochondrial OS=Homo sapiens GN=MRPL49 PE=1 SV=1 - [RM49_HUMAN]                                                              | 30.12 | 5  | 6   | 19.19  | 9.5  | 1.56 | 2.91E-03 |
| H0YF65 | Fibrocystin-L (Fragment) OS=Homo sapiens GN=PKHD1L1 PE=1 SV=1 - [H0YF65_HUMAN]                                                                           | 0.6   | 1  | 1   | 129.06 | 6.7  | 1.56 | 7.68E-03 |
| Q9BSK2 | Solute carrier family 25 member 33 OS=Homo sapiens GN=SLC25A33 PE=1 SV=1 - [S2533_HUMAN]                                                                 | 6.85  | 1  | 3   | 35.35  | 9.6  | 1.56 | 1.40E-02 |
| Q9Y6N5 | Sulfide:quinone oxidoreductase, mitochondrial OS=Homo sapiens GN=SQRDL PE=1 SV=1 - [SQRD_HUMAN]                                                          | 62    | 27 | 95  | 49.93  | 9.1  | 1.56 | 4.04E-03 |
| P04350 | Tubulin beta-4A chain OS=Homo sapiens GN=TUBB4A PE=1 SV=2 - [TBB4A_HUMAN]                                                                                | 60.14 | 1  | 157 | 49.55  | 4.9  | 1.56 | 2.70E-03 |
| Q9Y6C9 | Mitochondrial carrier homolog 2 OS=Homo sapiens GN=MTCH2 PE=1 SV=1 - [MTCH2_HUMAN]                                                                       | 37.29 | 4  | 44  | 33.31  | 8.0  | 1.56 | 2.18E-03 |



|            |                                                                                                                                                   |       |    |    |        |      |      |          |
|------------|---------------------------------------------------------------------------------------------------------------------------------------------------|-------|----|----|--------|------|------|----------|
| A0A087X208 | Agrin OS=Homo sapiens GN=AGRN PE=1 SV=1 - [A0A087X208_HUMAN]                                                                                      | 12.95 | 17 | 18 | 202.16 | 6.4  | 1.56 | 5.59E-03 |
| Q8WWC4     | m-AAA protease-interacting protein 1, mitochondrial OS=Homo sapiens GN=C2orf47 PE=1 SV=1 - [MAIP1_HUMAN]                                          | 17.18 | 5  | 20 | 32.52  | 9.2  | 1.56 | 8.40E-03 |
| Q14126     | Desmoglein-2 OS=Homo sapiens GN=DSG2 PE=1 SV=2 - [DSG2_HUMAN]                                                                                     | 9.84  | 6  | 7  | 122.22 | 5.2  | 1.56 | 8.67E-03 |
| A2VDJ4     | GNPTG protein (Fragment) OS=Homo sapiens GN=GNPTG PE=2 SV=1 - [A2VDJ4_HUMAN]                                                                      | 3.42  | 1  | 1  | 32.94  | 6.8  | 1.57 | 1.81E-02 |
| Q9BY49     | Peroxisomal trans-2-enoyl-CoA reductase OS=Homo sapiens GN=PECR PE=1 SV=2 - [PECR_HUMAN]                                                          | 26.4  | 7  | 10 | 32.52  | 8.8  | 1.57 | 4.14E-04 |
| B2R8A2     | cDNA, FLJ93804, highly similar to Homo sapiens gp25L2 protein (HSGP25L2G), mRNA OS=Homo sapiens PE=2 SV=1 - [B2R8A2_HUMAN]                        | 43.93 | 10 | 22 | 25.06  | 7.2  | 1.57 | 1.04E-02 |
| B2R7I6     | cDNA, FLJ93460, highly similar to Homo sapiens peroxisomal membrane protein 3, 35kDa (Zellweger syndrome) (PXMP3), mRNA OS=Homo sapiens PE=2 SV=1 | 6.56  | 2  | 4  | 34.87  | 8.7  | 1.57 | 7.15E-04 |
| Q4U2R6     | IR2P716 HUMAN<br>39S ribosomal protein L51, mitochondrial OS=Homo sapiens GN=MRPL51 PE=1 SV=1 - [RM51_HUMAN]                                      | 5.47  | 1  | 1  | 15.09  | 11.3 | 1.57 | 8.25E-03 |
| J3QRN3     | Zinc transporter ZIP11 OS=Homo sapiens GN=SLC39A11 PE=1 SV=1 - [J3QRN3_HUMAN]                                                                     | 23.46 | 1  | 2  | 8.54   | 5.3  | 1.57 | 1.03E-02 |
| Q13907     | Isopentenyl-diphosphate Delta-isomerase 1 OS=Homo sapiens GN=IDI1 PE=1 SV=2 - [IDI1_HUMAN]                                                        | 8.37  | 2  | 6  | 26.30  | 6.3  | 1.57 | 5.11E-03 |
| O75792     | Ribonuclease H2 subunit A OS=Homo sapiens GN=RNASEH2A PE=1 SV=2 - [RNH2A_HUMAN]                                                                   | 2.68  | 1  | 7  | 33.37  | 5.2  | 1.57 | 1.08E-03 |

|            |                                                                                                                       |       |   |    |       |      |      |          |
|------------|-----------------------------------------------------------------------------------------------------------------------|-------|---|----|-------|------|------|----------|
| O14672     | Disintegrin and metalloproteinase domain-containing protein 10 OS=Homo sapiens GN=ADAM10 PE=1 SV=1 - [ADA10_HUMAN]    | 10.83 | 7 | 9  | 84.09 | 7.8  | 1.57 | 3.42E-04 |
| B3KWR9     | Toll-like receptor OS=Homo sapiens PE=2 SV=1 - [B3KWR9_HUMAN]                                                         | 2.93  | 2 | 3  | 89.77 | 6.6  | 1.57 | 8.61E-03 |
| H0Y8F6     | 3-hydroxy-3-methylglutaryl-coenzyme A reductase (Fragment) OS=Homo sapiens GN=HMGCR PE=1 SV=1 - [H0Y8F6_HUMAN]        | 6.96  | 1 | 1  | 12.30 | 8.8  | 1.57 | 3.76E-03 |
| U3KQU8     | Oxidoreductase NAD-binding domain-containing protein 1 OS=Homo sapiens GN=OXNAD1 PE=1 SV=1 - [U3KQU8_HUMAN]           | 8.04  | 3 | 3  | 34.70 | 8.5  | 1.57 | 3.74E-03 |
| A0A024R2H7 | tRNA nucleotidyl transferase, CCA-adding, 1, isoform CRA_b OS=Homo sapiens GN=TRNT1 PE=3 SV=1 - [A0A024R2H7_HUMAN]    | 28.8  | 9 | 11 | 50.11 | 8.1  | 1.58 | 2.66E-03 |
| I3LOY5     | ATP synthase F(0) complex subunit C1, mitochondrial (Fragment) OS=Homo sapiens GN=ATP5G1 PE=3 SV=1 - [I3LOY5_HUMAN]   | 7.14  | 1 | 6  | 10.03 | 10.0 | 1.58 | 9.78E-03 |
| O43464     | Serine protease HTRA2, mitochondrial OS=Homo sapiens GN=HTRA2 PE=1 SV=2 - [HTRA2_HUMAN]                               | 13.1  | 4 | 7  | 48.81 | 10.1 | 1.58 | 8.22E-03 |
| Q7Z3K9     | Putative uncharacterized protein DKFZp781L0540 (Fragment) OS=Homo sapiens GN=DKFZp781L0540 PE=2 SV=1 - [Q7Z3K9_HUMAN] | 2.63  | 2 | 4  | 89.97 | 5.6  | 1.58 | 6.85E-04 |
| S6AP35     | MHC class II antigen (Fragment) OS=Homo sapiens GN=HLA-DQB1 PE=3 SV=1 - [S6AP35_HUMAN]                                | 45.08 | 1 | 21 | 41.16 | 6.6  | 1.58 | 4.23E-02 |
| Q8WXX5     | DnaJ homolog subfamily C member 9 OS=Homo sapiens GN=DNAJC9 PE=1 SV=1 - [DNJC9_HUMAN]                                 | 4.23  | 1 | 1  | 29.89 | 5.7  | 1.58 | 1.30E-02 |
| Q9H4A6     | Golgi phosphoprotein 3 OS=Homo sapiens GN=GOLPH3 PE=1 SV=1 - [GOLP3_HUMAN]                                            | 9.73  | 2 | 4  | 33.79 | 6.4  | 1.58 | 2.79E-04 |

|            |                                                                                                                                                  |       |    |    |       |     |      |          |
|------------|--------------------------------------------------------------------------------------------------------------------------------------------------|-------|----|----|-------|-----|------|----------|
| Q6NVY1     | 3-hydroxyisobutyryl-CoA hydrolase, mitochondrial OS=Homo sapiens GN=HIBCH PE=1 SV=2 - [HIBCH_HUMAN]                                              | 34.46 | 14 | 29 | 43.45 | 8.2 | 1.58 | 2.50E-03 |
| Q9H617     | Transmembrane protein 164 OS=Homo sapiens GN=RP13-360B22.2 PE=1 SV=1 - [Q9H617_HUMAN]                                                            | 6.98  | 1  | 1  | 29.21 | 7.5 | 1.58 | 4.18E-02 |
| O00519     | Fatty-acid amide hydrolase 1 OS=Homo sapiens GN=FAAH PE=1 SV=2 - [FAAH1_HUMAN]                                                                   | 11.05 | 5  | 6  | 63.03 | 7.7 | 1.58 | 2.60E-03 |
| Q9UH62     | Armadillo repeat-containing X-linked protein 3 OS=Homo sapiens GN=ARMCX3 PE=1 SV=1 - [ARMX3_HUMAN]                                               | 18.47 | 6  | 7  | 42.47 | 8.4 | 1.58 | 1.13E-02 |
| B2RA30     | cDNA, FLJ94673, highly similar to Homo sapiens potassium channel, subfamily K, member 1 (KCNK1), mRNA OS=Homo sapiens PE=2 SV=1 - [B2RA30_HUMAN] | 5.65  | 1  | 1  | 38.14 | 6.4 | 1.58 | 1.34E-02 |
| Q49A71     | 5-demethoxyubiquinone hydroxylase, mitochondrial OS=Homo sapiens GN=COQ7 PE=2 SV=1 - [Q49A71_HUMAN]                                              | 49.48 | 8  | 14 | 21.89 | 6.9 | 1.59 | 1.26E-02 |
| B3KSE0     | cDNA FLJ36069 fis, clone TEST12019406, highly similar to HEME OXYGENASE 2 (EC 1.14.99.3) OS=Homo sapiens PE=2 SV=1 - [B3KSE0_HUMAN]              | 15.82 | 5  | 14 | 35.94 | 5.5 | 1.59 | 2.47E-03 |
| B2R6T2     | cDNA, FLJ93100, highly similar to Homo sapiens calpain 6 (CAPN6), mRNA OS=Homo sapiens PE=2 SV=1 - [B2R6T2_HUMAN]                                | 8.42  | 4  | 5  | 74.54 | 7.0 | 1.59 | 7.70E-03 |
| E9PF19     | Transducin beta-like protein 2 OS=Homo sapiens GN=TBL2 PE=1 SV=1 - [E9PF19_HUMAN]                                                                | 48.91 | 16 | 42 | 45.91 | 9.5 | 1.59 | 2.19E-02 |
| A8K4K9     | cDNA FLJ76169 OS=Homo sapiens PE=2 SV=1 - [A8K4K9_HUMAN]                                                                                         | 24.24 | 6  | 11 | 34.84 | 6.8 | 1.59 | 1.71E-02 |
| A0A087WVA1 | Selenoprotein T OS=Homo sapiens GN=SELT PE=1 SV=1 - [A0A087WVA1_HUMAN]                                                                           | 10.26 | 2  | 2  | 22.33 | 8.8 | 1.59 | 1.39E-02 |

|        |                                                                                                                                                    |       |    |     |        |     |      |          |
|--------|----------------------------------------------------------------------------------------------------------------------------------------------------|-------|----|-----|--------|-----|------|----------|
| O95831 | Apoptosis-inducing factor 1, mitochondrial OS=Homo sapiens GN=AIFM1 PE=1 SV=1 - [AIFM1_HUMAN]                                                      | 46.66 | 24 | 158 | 66.86  | 9.0 | 1.59 | 2.76E-03 |
| B4DJV2 | Citrate synthase OS=Homo sapiens GN=CS PE=1 SV=1 - [B4DJV2_HUMAN]                                                                                  | 26.93 | 13 | 73  | 50.40  | 7.9 | 1.59 | 4.65E-03 |
| I3L0U2 | Testisin (Fragment) OS=Homo sapiens GN=PRSS21 PE=1 SV=1 - [I3L0U2_HUMAN]                                                                           | 7.34  | 1  | 1   | 24.80  | 8.3 | 1.59 | 2.30E-03 |
| Q5JT02 | Protein O-mannosyl-transferase 1 (Fragment) OS=Homo sapiens GN=POMT1 PE=1 SV=1 - [Q5JT02_HUMAN]                                                    | 5.49  | 1  | 2   | 39.41  | 9.0 | 1.59 | 1.13E-02 |
| P07919 | Cytochrome b-c1 complex subunit 6, mitochondrial OS=Homo sapiens GN=UQCRH PE=1 SV=2 - [QCR6_HUMAN]                                                 | 51.65 | 5  | 18  | 10.73  | 4.4 | 1.59 | 1.63E-02 |
| B4DKB9 | cDNA FLJ54085, highly similar to Homo sapiens calcium binding and coiled-coil domain 1 (CALCOCO1), mRNA OS=Homo sapiens PE=2 SV=1 - [B4DKB9_HUMAN] | 5.96  | 1  | 1   | 25.08  | 4.9 | 1.59 | 4.13E-03 |
| A8K4Q9 | cDNA FLJ77931 OS=Homo sapiens PE=2 SV=1 - [A8K4Q9_HUMAN]                                                                                           | 9.92  | 7  | 13  | 102.45 | 7.4 | 1.59 | 3.12E-03 |
| P61019 | Ras-related protein Rab-2A OS=Homo sapiens GN=RAB2A PE=1 SV=1 - [RAB2A_HUMAN]                                                                      | 57.08 | 5  | 34  | 23.53  | 6.5 | 1.59 | 1.37E-02 |
| P43490 | Nicotinamide phosphoribosyltransferase OS=Homo sapiens GN=NAMPT PE=1 SV=1 - [NAMPT_HUMAN]                                                          | 34.01 | 13 | 26  | 55.49  | 7.2 | 1.59 | 1.06E-02 |
| Q99797 | Mitochondrial intermediate peptidase OS=Homo sapiens GN=MIPEP PE=1 SV=2 - [MIPEP_HUMAN]                                                            | 20.76 | 12 | 19  | 80.59  | 7.0 | 1.59 | 4.68E-03 |
| Q96C36 | Pyrroline-5-carboxylate reductase 2 OS=Homo sapiens GN=PYCR2 PE=1 SV=1 - [P5CR2_HUMAN]                                                             | 45    | 11 | 34  | 33.62  | 7.8 | 1.59 | 9.38E-03 |

|        |                                                                                                                                                                        |       |    |     |        |     |      |          |
|--------|------------------------------------------------------------------------------------------------------------------------------------------------------------------------|-------|----|-----|--------|-----|------|----------|
| A8K337 | cDNA FLJ77862, highly similar to Homo sapiens catechol-O-methyltransferase domain containing 1 (COMTD1), mRNA OS=Homo sapiens PE=2 SV=1 - [A8K337_HUMAN]               | 19.47 | 5  | 6   | 28.82  | 8.4 | 1.59 | 2.79E-02 |
| O43708 | Maleylacetoacetate isomerase OS=Homo sapiens GN=GSTZ1 PE=1 SV=3 - [MAAI_HUMAN]                                                                                         | 26.85 | 1  | 7   | 24.20  | 8.5 | 1.59 | 3.61E-03 |
| A8K6K4 | cDNA FLJ77565, highly similar to Homo sapiens interleukin 1 receptor accessory protein (IL1RAP), transcript variant 1, mRNA OS=Homo sapiens PE=2 SV=1 - [A8K6K4_HUMAN] | 6.49  | 4  | 6   | 65.39  | 8.2 | 1.60 | 3.03E-04 |
| P50213 | Isocitrate dehydrogenase [NAD] subunit alpha, mitochondrial OS=Homo sapiens GN=IDH3A PE=1 SV=1 - [IDH3A_HUMAN]                                                         | 47.81 | 18 | 53  | 39.57  | 6.9 | 1.60 | 2.27E-02 |
| B4DP77 | cDNA FLJ57413, highly similar to Mitochondrial 28S ribosomal protein S10 OS=Homo sapiens PE=2 SV=1 - [B4DP77_HUMAN]                                                    | 35    | 4  | 11  | 18.72  | 6.4 | 1.60 | 1.12E-02 |
| Q13753 | Laminin subunit gamma-2 OS=Homo sapiens GN=LAMC2 PE=1 SV=2 - [LAMC2_HUMAN]                                                                                             | 4.02  | 4  | 4   | 130.89 | 6.2 | 1.60 | 4.91E-03 |
| Q7Z406 | Myosin-14 OS=Homo sapiens GN=MYH14 PE=1 SV=2 - [MYH14_HUMAN]                                                                                                           | 40.35 | 34 | 170 | 227.73 | 5.6 | 1.60 | 4.32E-04 |
| O95716 | Ras-related protein Rab-3D OS=Homo sapiens GN=RAB3D PE=1 SV=1 - [RAB3D_HUMAN]                                                                                          | 30.59 | 4  | 16  | 24.25  | 4.9 | 1.60 | 3.87E-03 |
| I3RW89 | MHC class Ib antigen (Fragment) OS=Homo sapiens GN=HLA-E PE=3 SV=1 - [I3RW89_HUMAN]                                                                                    | 25.42 | 3  | 11  | 33.78  | 5.4 | 1.60 | 3.08E-02 |
| B3KM26 | cDNA FLJ10050 fis, clone HEMBA1001257, highly similar to Alpha-methylacyl-CoA racemase (EC 5.1.99.4) OS=Homo sapiens PE=2 SV=1 - [B3KM26_HUMAN]                        | 1.83  | 1  | 1   | 42.36  | 6.7 | 1.60 | 3.30E-03 |
| Q96AB3 | Isochorismatase domain-containing protein 2 OS=Homo sapiens GN=ISOC2 PE=1 SV=1 - [ISOC2_HUMAN]                                                                         | 59.02 | 7  | 23  | 22.32  | 7.8 | 1.60 | 9.79E-03 |

|            |                                                                                                                               |       |    |     |       |     |      |          |
|------------|-------------------------------------------------------------------------------------------------------------------------------|-------|----|-----|-------|-----|------|----------|
| C9JFL0     | Protein FAM185A (Fragment) OS=Homo sapiens<br>GN=FAM185A PE=1 SV=8 - [C9JFL0_HUMAN]                                           | 17.53 | 3  | 3   | 21.12 | 7.2 | 1.60 | 3.81E-03 |
| X5CMH5     | Antigen peptide transporter 2 OS=Homo sapiens GN=TAP2<br>PE=1 SV=1 - [X5CMH5_HUMAN]                                           | 28.31 | 17 | 36  | 77.65 | 7.9 | 1.60 | 1.20E-03 |
| D3DUJ0     | AFG3 ATPase family gene 3-like 2 (Yeast), isoform CRA_a<br>(Fragment) OS=Homo sapiens GN=AFG3L2 PE=3 SV=1 -<br>[D3DUJ0_HUMAN] | 46.64 | 32 | 122 | 84.39 | 8.4 | 1.60 | 1.88E-04 |
| Q9HB66     | Alternative protein MKKS OS=Homo sapiens GN=MKKS<br>PE=1 SV=1 - [Q9HB66_HUMAN]                                                | 41.27 | 2  | 5   | 7.26  | 9.6 | 1.60 | 1.47E-02 |
| K7EJJ1     | AP-1 complex subunit mu-2 (Fragment) OS=Homo sapiens<br>GN=AP1M2 PE=1 SV=1 - [K7EJJ1_HUMAN]                                   | 6.94  | 1  | 1   | 27.87 | 5.6 | 1.60 | 3.30E-03 |
| Q8TCT9     | Minor histocompatibility antigen H13 OS=Homo sapiens<br>GN=HM13 PE=1 SV=1 - [HM13_HUMAN]                                      | 23.08 | 10 | 31  | 41.46 | 6.4 | 1.60 | 3.25E-03 |
| P01833     | Polymeric immunoglobulin receptor OS=Homo sapiens<br>GN=PIGR PE=1 SV=4 - [PIGR_HUMAN]                                         | 14.14 | 9  | 18  | 83.23 | 5.7 | 1.61 | 1.96E-02 |
| A8K454     | cDNA FLJ78187, highly similar to Homo sapiens calmegin,<br>mRNA OS=Homo sapiens PE=2 SV=1 - [A8K454_HUMAN]                    | 11.48 | 5  | 9   | 69.99 | 4.7 | 1.61 | 2.43E-04 |
| A0A1B0GTB0 | Renin receptor (Fragment) OS=Homo sapiens<br>GN=ATP6AP2 PE=1 SV=1 - [A0A1B0GTB0_HUMAN]                                        | 20.41 | 1  | 8   | 33.00 | 6.1 | 1.61 | 3.61E-03 |
| B4DZ87     | cDNA FLJ57240, highly similar to Mitochondrial proteins<br>import receptor OS=Homo sapiens PE=2 SV=1 -<br>[B4DZ87_HUMAN]      | 47.7  | 24 | 70  | 56.89 | 5.9 | 1.61 | 2.84E-03 |
| P21757     | Macrophage scavenger receptor types I and II OS=Homo<br>sapiens GN=MSR1 PE=1 SV=1 - [MSRE_HUMAN]                              | 1.55  | 1  | 1   | 49.73 | 5.9 | 1.61 | 8.10E-04 |

|        |                                                                                                            |       |    |     |        |      |      |          |
|--------|------------------------------------------------------------------------------------------------------------|-------|----|-----|--------|------|------|----------|
| Q92968 | Peroxisomal membrane protein PEX13 OS=Homo sapiens GN=PEX13 PE=1 SV=2 - [PEX13_HUMAN]                      | 2.48  | 1  | 2   | 44.10  | 8.0  | 1.61 | 3.58E-03 |
| Q3MIX3 | Uncharacterized aarF domain-containing protein kinase 5 OS=Homo sapiens GN=ADCK5 PE=1 SV=2 - [ADCK5_HUMAN] | 12.24 | 6  | 10  | 65.85  | 9.0  | 1.61 | 2.49E-04 |
| X6RIW1 | 39S ribosomal protein L55, mitochondrial (Fragment) OS=Homo sapiens GN=MRPL55 PE=1 SV=1 - [X6RIW1_HUMAN]   | 10.53 | 1  | 2   | 8.61   | 11.9 | 1.61 | 9.50E-03 |
| P07954 | Fumarate hydratase, mitochondrial OS=Homo sapiens GN=FH PE=1 SV=3 - [FUMH_HUMAN]                           | 52.16 | 20 | 137 | 54.60  | 8.8  | 1.61 | 8.84E-03 |
| P08311 | Cathepsin G OS=Homo sapiens GN=CTSG PE=1 SV=2 - [CATG_HUMAN]                                               | 35.69 | 7  | 13  | 28.82  | 11.2 | 1.62 | 2.97E-02 |
| Q8N490 | Probable hydrolase PNKD OS=Homo sapiens GN=PNKD PE=1 SV=2 - [PNKD_HUMAN]                                   | 9.61  | 2  | 5   | 42.85  | 9.1  | 1.62 | 1.13E-02 |
| Q9NPJ3 | Acyl-coenzyme A thioesterase 13 OS=Homo sapiens GN=ACOT13 PE=1 SV=1 - [ACO13_HUMAN]                        | 25    | 3  | 8   | 14.95  | 9.1  | 1.62 | 4.47E-03 |
| P15144 | Aminopeptidase N OS=Homo sapiens GN=ANPEP PE=1 SV=4 - [AMPN_HUMAN]                                         | 13.75 | 10 | 14  | 109.47 | 5.5  | 1.62 | 1.75E-02 |
| P0DMU7 | Cancer/testis antigen family 45 member A6 OS=Homo sapiens GN=CT45A6 PE=2 SV=1 - [CT456_HUMAN]              | 3.7   | 1  | 1   | 21.22  | 9.7  | 1.62 | 1.53E-02 |
| B2MUD5 | Neutrophil elastase (Fragment) OS=Homo sapiens GN=ELA2 PE=4 SV=1 - [B2MUD5_HUMAN]                          | 13.02 | 3  | 4   | 20.65  | 8.9  | 1.62 | 9.32E-04 |
| P43897 | Elongation factor Ts, mitochondrial OS=Homo sapiens GN=TSMF PE=1 SV=2 - [EFTS_HUMAN]                       | 43.69 | 12 | 32  | 35.37  | 8.4  | 1.62 | 2.12E-03 |

|            |                                                                                                                                           |       |    |     |       |      |      |          |
|------------|-------------------------------------------------------------------------------------------------------------------------------------------|-------|----|-----|-------|------|------|----------|
| B3KQF7     | cDNA FLJ90383 fis, clone NT2RP2005163 OS=Homo sapiens PE=2 SV=1 - [B3KQF7_HUMAN]                                                          | 10.49 | 3  | 5   | 53.52 | 6.4  | 1.62 | 2.30E-03 |
| Q08426     | Peroxisomal bifunctional enzyme OS=Homo sapiens GN=EHHADH PE=1 SV=3 - [EHP_HUMAN]                                                         | 33.47 | 22 | 34  | 79.44 | 9.1  | 1.62 | 2.25E-03 |
| Q13217     | DnaJ homolog subfamily C member 3 OS=Homo sapiens GN=DNAJC3 PE=1 SV=1 - [DNJC3_HUMAN]                                                     | 26.39 | 11 | 18  | 57.54 | 6.2  | 1.62 | 2.70E-02 |
| Q9Y6H1     | Coiled-coil-helix-coiled-coil-helix domain-containing protein 2 OS=Homo sapiens GN=CHCHD2 PE=1 SV=1 - [CHCH2_HUMAN]                       | 15.23 | 2  | 9   | 15.50 | 9.2  | 1.62 | 2.42E-02 |
| A0A140VJK2 | Glycerol-3-phosphate dehydrogenase OS=Homo sapiens PE=2 SV=1 - [A0A140VJK2_HUMAN]                                                         | 63.82 | 44 | 162 | 80.78 | 7.5  | 1.62 | 4.27E-03 |
| A0A087WWV7 | Uncharacterized protein KIAA1755 (Fragment) OS=Homo sapiens GN=KIAA1755 PE=1 SV=1 - [A0A087WWV7_HUMAN]                                    | 18.42 | 1  | 1   | 3.87  | 10.7 | 1.62 | 1.61E-02 |
| Q8NBT6     | cDNA FLJ90758 fis, clone SKNMC1000082, highly similar to Mitochondrial deoxynucleotide carrier OS=Homo sapiens PE=2 SV=1 - [Q8NBT6_HUMAN] | 18.75 | 7  | 7   | 35.45 | 9.5  | 1.62 | 4.01E-03 |
| A6NNL5     | Uncharacterized protein C15orf61 OS=Homo sapiens GN=C15orf61 PE=2 SV=2 - [CO061_HUMAN]                                                    | 3.82  | 1  | 1   | 18.08 | 9.9  | 1.62 | 5.95E-03 |
| Q6UXH1     | Cysteine-rich with EGF-like domain protein 2 OS=Homo sapiens GN=CRELD2 PE=1 SV=1 - [CREL2_HUMAN]                                          | 16.71 | 5  | 8   | 38.17 | 4.6  | 1.63 | 3.62E-03 |
| F8VUJ3     | Polypeptide N-acetylgalactosaminyltransferase OS=Homo sapiens GN=POC1B-GALNT4 PE=3 SV=1 - [F8VUJ3_HUMAN]                                  | 20.52 | 11 | 17  | 66.20 | 7.5  | 1.63 | 1.64E-02 |
| P82933     | 28S ribosomal protein S9, mitochondrial OS=Homo sapiens GN=MRPS9 PE=1 SV=2 - [RT09_HUMAN]                                                 | 39.14 | 13 | 29  | 45.81 | 9.5  | 1.63 | 1.98E-02 |



|        |                                                                                                                |       |    |    |       |     |      |          |
|--------|----------------------------------------------------------------------------------------------------------------|-------|----|----|-------|-----|------|----------|
| H0Y2W2 | ATPase family AAA domain-containing protein 3A (Fragment) OS=Homo sapiens GN=ATAD3A PE=1 SV=1 - [H0Y2W2_HUMAN] | 43.01 | 2  | 90 | 64.31 | 9.4 | 1.63 | 9.40E-03 |
| P27449 | V-type proton ATPase 16 kDa proteolipid subunit OS=Homo sapiens GN=ATP6V0C PE=1 SV=1 - [VATL_HUMAN]            | 11.61 | 1  | 18 | 15.73 | 8.4 | 1.63 | 4.24E-04 |
| Q96DB5 | Regulator of microtubule dynamics protein 1 OS=Homo sapiens GN=RMDN1 PE=1 SV=1 - [RMD1_HUMAN]                  | 27.39 | 7  | 11 | 35.79 | 8.5 | 1.63 | 3.53E-02 |
| C9JAX1 | Fra1taxin, mitochondrial OS=Homo sapiens GN=FXN PE=1 SV=1 - [C9JAX1_HUMAN]                                     | 38.52 | 4  | 10 | 14.90 | 5.1 | 1.63 | 1.45E-02 |
| C9J3L8 | Translocon-associated protein subunit alpha OS=Homo sapiens GN=SSR1 PE=1 SV=1 - [C9J3L8_HUMAN]                 | 12.83 | 3  | 45 | 29.55 | 4.3 | 1.63 | 3.61E-03 |
| Q9NUN5 | Probable lysosomal cobalamin transporter OS=Homo sapiens GN=LMBRD1 PE=1 SV=1 - [LMBD1_HUMAN]                   | 3.33  | 1  | 1  | 61.35 | 7.8 | 1.63 | 2.12E-02 |
| O95721 | Synaptosomal-associated protein 29 OS=Homo sapiens GN=SNAP29 PE=1 SV=1 - [SNP29_HUMAN]                         | 8.14  | 2  | 2  | 28.95 | 5.8 | 1.63 | 1.96E-02 |
| Q8N118 | Cytochrome P450 4X1 OS=Homo sapiens GN=CYP4X1 PE=2 SV=1 - [CP4X1_HUMAN]                                        | 10.02 | 5  | 5  | 58.84 | 8.5 | 1.63 | 1.25E-02 |
| B2R6Q2 | Alkaline phosphatase OS=Homo sapiens PE=2 SV=1 - [B2R6Q2_HUMAN]                                                | 7.25  | 4  | 5  | 57.24 | 6.6 | 1.64 | 2.66E-03 |
| Q13162 | Peroxisredoxin-4 OS=Homo sapiens GN=PRDX4 PE=1 SV=1 - [PRDX4_HUMAN]                                            | 62.36 | 10 | 55 | 30.52 | 6.3 | 1.64 | 4.37E-02 |
| P12318 | Low affinity immunoglobulin gamma Fc region receptor II-a OS=Homo sapiens GN=FCGR2A PE=1 SV=4 - [FCG2A_HUMAN]  | 3.15  | 1  | 1  | 34.98 | 6.7 | 1.64 | 5.95E-03 |

|        |                                                                                                                                            |       |    |     |        |     |      |          |
|--------|--------------------------------------------------------------------------------------------------------------------------------------------|-------|----|-----|--------|-----|------|----------|
| O60220 | Mitochondrial import inner membrane translocase subunit Tim8 A OS=Homo sapiens GN=TIMM8A PE=1 SV=1 - [TIM8A_HUMAN]                         | 38.14 | 3  | 7   | 10.99  | 5.2 | 1.64 | 1.82E-02 |
| P42126 | Enoyl-CoA delta isomerase 1, mitochondrial OS=Homo sapiens GN=ECI1 PE=1 SV=1 - [ECI1_HUMAN]                                                | 34.44 | 8  | 50  | 32.80  | 8.5 | 1.64 | 1.99E-03 |
| Q86SF2 | N-acetylgalactosaminyltransferase 7 OS=Homo sapiens GN=GALNT7 PE=1 SV=1 - [GALT7_HUMAN]                                                    | 17.05 | 10 | 15  | 75.34  | 7.1 | 1.64 | 4.07E-03 |
| Q53HR4 | Chromosome 15 open reading frame 22 variant (Fragment) OS=Homo sapiens PE=2 SV=1 - [Q53HR4_HUMAN]                                          | 22.12 | 3  | 6   | 24.75  | 5.8 | 1.64 | 1.10E-02 |
| K7EMM8 | Putative oxidoreductase GLYR1 (Fragment) OS=Homo sapiens GN=GLYR1 PE=1 SV=2 - [K7EMM8_HUMAN]                                               | 3.24  | 1  | 2   | 57.29  | 9.2 | 1.64 | 2.35E-03 |
| Q9BV61 | TRAP1 protein (Fragment) OS=Homo sapiens GN=TRAP1 PE=2 SV=2 - [Q9BV61_HUMAN]                                                               | 42.78 | 4  | 135 | 79.31  | 7.8 | 1.64 | 8.92E-03 |
| P11117 | Lysosomal acid phosphatase OS=Homo sapiens GN=ACP2 PE=1 SV=3 - [PPAL_HUMAN]                                                                | 14.66 | 6  | 12  | 48.31  | 6.7 | 1.64 | 6.07E-03 |
| B3KPI5 | cDNA FLJ31840 fis, clone NT2RP7000109, highly similar to Tudor and KH domain-containing protein OS=Homo sapiens PE=2 SV=1 - [B3KPI5_HUMAN] | 1.08  | 1  | 1   | 61.45  | 5.0 | 1.64 | 1.03E-03 |
| Q5JRX3 | Presequence protease, mitochondrial OS=Homo sapiens GN=PITRM1 PE=1 SV=3 - [PREP_HUMAN]                                                     | 46.58 | 39 | 112 | 117.34 | 6.9 | 1.64 | 1.19E-02 |
| P53794 | Sodium/myo-inositol cotransporter OS=Homo sapiens GN=SLC5A3 PE=1 SV=2 - [SC5A3_HUMAN]                                                      | 5.71  | 3  | 5   | 79.64  | 7.3 | 1.65 | 1.98E-03 |
| Q9BW75 | THOP1 protein (Fragment) OS=Homo sapiens GN=THOP1 PE=2 SV=2 - [Q9BW75_HUMAN]                                                               | 3.72  | 2  | 2   | 67.84  | 6.5 | 1.65 | 8.50E-04 |

|        |                                                                                                                                           |       |    |    |       |     |      |          |
|--------|-------------------------------------------------------------------------------------------------------------------------------------------|-------|----|----|-------|-----|------|----------|
| Q5R3K3 | Protein FAM26F OS=Homo sapiens GN=FAM26F PE=2 SV=1 - [FA26F_HUMAN]                                                                        | 2.86  | 1  | 1  | 34.44 | 8.6 | 1.65 | 2.93E-04 |
| B4DWH7 | cDNA FLJ57632, highly similar to Vacuolar ATP synthase subunit B, kidney isoform (EC 3.6.3.14) OS=Homo sapiens PE=2 SV=1 - [B4DWH7_HUMAN] | 16.39 | 3  | 7  | 54.26 | 5.7 | 1.65 | 6.18E-03 |
| Q9H857 | 5'-nucleotidase domain-containing protein 2 OS=Homo sapiens GN=NT5DC2 PE=1 SV=1 - [NT5D2_HUMAN]                                           | 31.54 | 14 | 27 | 60.68 | 6.8 | 1.65 | 1.37E-03 |
| Q9Y3A6 | Transmembrane emp24 domain-containing protein 5 OS=Homo sapiens GN=TMED5 PE=1 SV=1 - [TMED5_HUMAN]                                        | 17.03 | 4  | 14 | 25.99 | 4.8 | 1.65 | 1.30E-02 |
| Q15293 | Reticulocalbin-1 OS=Homo sapiens GN=RCN1 PE=1 SV=1 - [RCN1_HUMAN]                                                                         | 31.72 | 9  | 30 | 38.87 | 5.0 | 1.65 | 7.56E-04 |
| Q96HE7 | ERO1-like protein alpha OS=Homo sapiens GN=ERO1A PE=1 SV=2 - [ERO1A_HUMAN]                                                                | 52.14 | 18 | 47 | 54.36 | 5.7 | 1.65 | 1.48E-02 |
| P61956 | Small ubiquitin-related modifier 2 OS=Homo sapiens GN=SUMO2 PE=1 SV=3 - [SUMO2_HUMAN]                                                     | 12.63 | 1  | 1  | 10.86 | 5.5 | 1.65 | 1.25E-02 |
| G8JLB3 | tRNA pseudouridine synthase (Fragment) OS=Homo sapiens GN=PUS1 PE=1 SV=1 - [G8JLB3_HUMAN]                                                 | 37.24 | 11 | 17 | 42.89 | 8.5 | 1.65 | 6.41E-04 |
| Q99467 | CD180 antigen OS=Homo sapiens GN=CD180 PE=1 SV=2 - [CD180_HUMAN]                                                                          | 3.78  | 1  | 1  | 74.13 | 6.4 | 1.66 | 3.38E-02 |
| A8K610 | cDNA FLJ76619 OS=Homo sapiens PE=2 SV=1 - [A8K610_HUMAN]                                                                                  | 9.62  | 2  | 2  | 23.08 | 9.0 | 1.66 | 3.74E-02 |
| Q96SL4 | Glutathione peroxidase 7 OS=Homo sapiens GN=GPX7 PE=1 SV=1 - [GPX7_HUMAN]                                                                 | 33.16 | 5  | 9  | 20.98 | 8.3 | 1.66 | 2.77E-04 |

|            |                                                                                                                          |       |    |    |        |     |      |          |
|------------|--------------------------------------------------------------------------------------------------------------------------|-------|----|----|--------|-----|------|----------|
| Q6IN84     | rRNA methyltransferase 1, mitochondrial OS=Homo sapiens<br>GN=MRM1 PE=1 SV=1 - [MRM1_HUMAN]                              | 3.12  | 1  | 1  | 38.61  | 7.9 | 1.67 | 6.11E-05 |
| P50583     | Bis(5'-nucleosyl)-tetraphosphatase [asymmetrical]<br>OS=Homo sapiens GN=NUDT2 PE=1 SV=3 -<br>[AP4A_HUMAN]                | 9.52  | 1  | 1  | 16.82  | 5.4 | 1.67 | 2.05E-03 |
| A0A142L067 | MHC class II antigen (Fragment) OS=Homo sapiens<br>GN=HLA-DQB1 PE=3 SV=1 - [A0A142L067_HUMAN]                            | 24.11 | 3  | 5  | 25.87  | 7.2 | 1.67 | 1.55E-02 |
| Q53F67     | Kringle-containing transmembrane protein 2 isoform b<br>variant (Fragment) OS=Homo sapiens PE=2 SV=1 -<br>[Q53F67_HUMAN] | 5.71  | 1  | 1  | 44.42  | 6.2 | 1.67 | 2.04E-03 |
| H7C5A7     | Acyl-coenzyme A thioesterase 8 (Fragment) OS=Homo<br>sapiens GN=ACOT8 PE=1 SV=1 - [H7C5A7_HUMAN]                         | 18.66 | 2  | 7  | 23.43  | 9.6 | 1.67 | 4.07E-03 |
| A0A0A0MRM8 | Unconventional myosin-VI OS=Homo sapiens GN=MYO6<br>PE=1 SV=1 - [A0A0A0MRM8_HUMAN]                                       | 22.59 | 22 | 36 | 144.92 | 8.6 | 1.67 | 4.34E-03 |
| A8DU55     | Connexin 26 (Fragment) OS=Homo sapiens GN=GJB2<br>PE=4 SV=1 - [A8DU55_HUMAN]                                             | 16.8  | 2  | 2  | 14.44  | 9.1 | 1.67 | 8.96E-03 |
| I3L3P5     | Protein disulfide-isomerase (Fragment) OS=Homo sapiens<br>GN=P4HB PE=1 SV=1 - [I3L3P5_HUMAN]                             | 57.69 | 1  | 34 | 16.87  | 4.8 | 1.67 | 1.36E-03 |
| P11215     | Integrin alpha-M OS=Homo sapiens GN=ITGAM PE=1<br>SV=2 - [ITAM_HUMAN]                                                    | 9.9   | 10 | 14 | 127.10 | 7.2 | 1.67 | 2.05E-03 |
| P29762     | Cellular retinoic acid-binding protein 1 OS=Homo sapiens<br>GN=CRABP1 PE=1 SV=2 - [RABP1_HUMAN]                          | 14.6  | 2  | 3  | 15.56  | 5.4 | 1.67 | 1.14E-02 |
| P54792     | Putative segment polarity protein dishevelled homolog<br>DVL1P1 OS=Homo sapiens GN=DVL1P1 PE=5 SV=1 -<br>[DVL1P1_HUMAN]  | 1.19  | 1  | 1  | 73.21  | 6.5 | 1.67 | 4.88E-04 |

|        |                                                                                                                                       |       |    |    |        |     |      |          |
|--------|---------------------------------------------------------------------------------------------------------------------------------------|-------|----|----|--------|-----|------|----------|
| Q6PIU2 | Neutral cholesterol ester hydrolase 1 OS=Homo sapiens<br>GN=NCEH1 PE=1 SV=3 - [NCEH1_HUMAN]                                           | 12.99 | 5  | 11 | 45.78  | 7.2 | 1.67 | 3.07E-03 |
| B2R761 | cDNA, FLJ93299, highly similar to Homo sapiens sterol<br>carrier protein 2 (SCP2), mRNA OS=Homo sapiens PE=2<br>SV=1 - [B2R761_HUMAN] | 44.42 | 20 | 75 | 58.98  | 7.0 | 1.68 | 8.63E-04 |
| O75844 | CAAX prenyl protease 1 homolog OS=Homo sapiens<br>GN=ZMPSTE24 PE=1 SV=2 - [FACE1_HUMAN]                                               | 20.63 | 9  | 27 | 54.78  | 7.5 | 1.68 | 2.16E-03 |
| B1Q2B0 | URCC5 OS=Homo sapiens GN=URCC5 PE=2 SV=1 -<br>[B1Q2B0_HUMAN]                                                                          | 7.68  | 7  | 11 | 101.24 | 8.4 | 1.68 | 5.31E-03 |
| B2R6A3 | Na(+)/H(+) exchange regulatory cofactor NHE-RF<br>OS=Homo sapiens PE=2 SV=1 - [B2R6A3_HUMAN]                                          | 6.7   | 2  | 2  | 38.87  | 5.8 | 1.68 | 2.71E-04 |
| F6VGH2 | Kinesin-like protein KIF6 OS=Homo sapiens GN=KIF6<br>PE=4 SV=2 - [F6VGH2_HUMAN]                                                       | 4.1   | 1  | 1  | 33.12  | 7.2 | 1.68 | 5.35E-03 |
| Q8TDB6 | E3 ubiquitin-protein ligase DTX3L OS=Homo sapiens<br>GN=DTX3L PE=1 SV=1 - [DTX3L_HUMAN]                                               | 9.86  | 6  | 7  | 83.50  | 8.1 | 1.68 | 8.05E-03 |
| B4DVE1 | cDNA FLJ53478, highly similar to Galectin-3-binding protein<br>OS=Homo sapiens PE=2 SV=1 - [B4DVE1_HUMAN]                             | 28.45 | 14 | 42 | 64.06  | 5.5 | 1.68 | 5.58E-03 |
| Q14657 | EKC/KEOPS complex subunit LAGE3 OS=Homo sapiens<br>GN=LAGE3 PE=1 SV=2 - [LAGE3_HUMAN]                                                 | 11.19 | 1  | 1  | 14.79  | 8.6 | 1.68 | 7.15E-03 |
| C5HTZ1 | Amiloride-sensitive sodium channel subunit alpha<br>OS=Homo sapiens GN=SCNN1A PE=1 SV=1 -<br>[C5HTZ1_HUMAN]                           | 4.49  | 1  | 1  | 28.38  | 6.7 | 1.68 | 5.20E-03 |
| Q14696 | LDLR chaperone MESD OS=Homo sapiens GN=MESDC2<br>PE=1 SV=2 - [MESD_HUMAN]                                                             | 34.62 | 8  | 13 | 26.06  | 7.8 | 1.68 | 8.45E-03 |

|            |                                                                                                                                                          |       |    |    |       |     |      |          |
|------------|----------------------------------------------------------------------------------------------------------------------------------------------------------|-------|----|----|-------|-----|------|----------|
| A0A097Q0T5 | Cytochrome c oxidase subunit 2 OS=Homo sapiens<br>GN=COX2 PE=3 SV=1 - [A0A097Q0T5_HUMAN]                                                                 | 26.43 | 1  | 64 | 25.55 | 4.8 | 1.68 | 4.38E-02 |
| A0A0S2Z3D2 | BCL2-like 1 isoform 3 OS=Homo sapiens GN=BCL2L1<br>PE=2 SV=1 - [A0A0S2Z3D2_HUMAN]                                                                        | 5.96  | 1  | 2  | 16.69 | 5.0 | 1.68 | 8.14E-03 |
| Q9NPA0     | ER membrane protein complex subunit 7 OS=Homo<br>sapiens GN=EMC7 PE=1 SV=1 - [EMC7_HUMAN]                                                                | 29.75 | 5  | 9  | 26.45 | 9.2 | 1.69 | 1.50E-02 |
| Q9NTX5     | Ethylmalonyl-CoA decarboxylase OS=Homo sapiens<br>GN=ECHDC1 PE=1 SV=2 - [ECHD1_HUMAN]                                                                    | 9.45  | 3  | 10 | 33.68 | 8.2 | 1.69 | 3.67E-03 |
| B4DGN8     | cDNA FLJ53377, highly similar to Procollagen-lysine, 2-<br>oxoglutarate 5-dioxygenase 1 (EC 1.14.11.4) OS=Homo<br>sapiens PE=2 SV=1 - [B4DGN8_HUMAN]     | 27.83 | 15 | 29 | 79.35 | 7.0 | 1.69 | 1.56E-02 |
| O75396     | Vesicle-trafficking protein SEC22b OS=Homo sapiens<br>GN=SEC22B PE=1 SV=4 - [SC22B_HUMAN]                                                                | 29.3  | 6  | 19 | 24.58 | 6.9 | 1.69 | 1.32E-03 |
| P08727     | Keratin, type I cytoskeletal 19 OS=Homo sapiens<br>GN=KRT19 PE=1 SV=4 - [K1C19_HUMAN]                                                                    | 27.75 | 5  | 13 | 44.08 | 5.1 | 1.69 | 3.01E-03 |
| P18065     | Insulin-like growth factor-binding protein 2 OS=Homo<br>sapiens GN=IGFBP2 PE=1 SV=2 - [IBP2_HUMAN]                                                       | 12.31 | 3  | 3  | 34.79 | 7.5 | 1.69 | 1.32E-03 |
| B2R659     | cDNA, FLJ92803, highly similar to Homo sapiens<br>hydroxysteroid (17-beta) dehydrogenase 4 (HSD17B4),<br>mRNA OS=Homo sapiens PE=2 SV=1 - [B2R659_HUMAN] | 48.1  | 3  | 80 | 79.56 | 8.9 | 1.69 | 6.47E-04 |
| P20591     | Interferon-induced GTP-binding protein Mx1 OS=Homo<br>sapiens GN=MX1 PE=1 SV=4 - [MX1_HUMAN]                                                             | 33.99 | 15 | 35 | 75.47 | 5.8 | 1.69 | 2.87E-03 |
| Q7L8L6     | FAST kinase domain-containing protein 5, mitochondrial<br>OS=Homo sapiens GN=FASTKD5 PE=1 SV=1 -<br>[FAKD5_HUMAN]                                        | 20.42 | 14 | 17 | 86.52 | 8.1 | 1.70 | 6.11E-03 |

|        |                                                                                                                                    |       |    |     |        |     |      |          |
|--------|------------------------------------------------------------------------------------------------------------------------------------|-------|----|-----|--------|-----|------|----------|
| J7RE54 | HLA-A protein (Fragment) OS=Homo sapiens GN=HLA-A PE=3 SV=1 - [J7RE54_HUMAN]                                                       | 51.28 | 1  | 19  | 31.60  | 5.7 | 1.70 | 5.24E-03 |
| P02792 | Ferritin light chain OS=Homo sapiens GN=FTL PE=1 SV=2 - [FRIL_HUMAN]                                                               | 36.57 | 6  | 12  | 20.01  | 5.8 | 1.70 | 8.98E-03 |
| P78536 | Disintegrin and metalloproteinase domain-containing protein 17 OS=Homo sapiens GN=ADAM17 PE=1 SV=1 - [ADA17_HUMAN]                 | 5.95  | 4  | 4   | 92.96  | 5.8 | 1.70 | 7.42E-03 |
| B7Z4Y5 | cDNA FLJ51553, highly similar to HLA class II histocompatibility antigen, DMalpha chain OS=Homo sapiens PE=2 SV=1 - [B7Z4Y5_HUMAN] | 27.64 | 2  | 3   | 14.11  | 4.4 | 1.70 | 8.19E-03 |
| C9J8T4 | E3 ubiquitin-protein ligase RNF13 (Fragment) OS=Homo sapiens GN=RNF13 PE=1 SV=1 - [C9J8T4_HUMAN]                                   | 19.02 | 2  | 2   | 17.92  | 4.8 | 1.70 | 1.66E-03 |
| P42704 | Leucine-rich PPR motif-containing protein, mitochondrial OS=Homo sapiens GN=LRPPRC PE=1 SV=3 - [LRPPRC_HUMAN]                      | 62.41 | 80 | 306 | 157.81 | 6.1 | 1.70 | 4.79E-03 |
| B4DYB6 | Receptor expression-enhancing protein OS=Homo sapiens PE=2 SV=1 - [B4DYB6_HUMAN]                                                   | 4.44  | 1  | 1   | 25.17  | 9.5 | 1.71 | 1.14E-02 |
| Q96199 | Succinate--CoA ligase [GDP-forming] subunit beta, mitochondrial OS=Homo sapiens GN=SUCLG2 PE=1 SV=2 - [SUCB2_HUMAN]                | 44.91 | 19 | 115 | 46.48  | 6.4 | 1.71 | 8.17E-04 |
| Q75MT9 | Malate dehydrogenase (Fragment) OS=Homo sapiens GN=MDH2 PE=3 SV=1 - [Q75MT9_HUMAN]                                                 | 74.37 | 21 | 262 | 33.21  | 8.3 | 1.71 | 5.51E-03 |
| F2Z3N7 | Transmembrane protein 106B OS=Homo sapiens GN=TMEM106B PE=1 SV=1 - [F2Z3N7_HUMAN]                                                  | 12.5  | 1  | 1   | 11.64  | 6.3 | 1.71 | 3.61E-03 |
| B4DJQ5 | cDNA FLJ59211, highly similar to Glucosidase 2 subunit beta OS=Homo sapiens PE=2 SV=1 - [B4DJQ5_HUMAN]                             | 35.89 | 16 | 88  | 60.10  | 4.4 | 1.71 | 2.85E-03 |

|            |                                                                                                        |       |    |     |       |     |      |          |
|------------|--------------------------------------------------------------------------------------------------------|-------|----|-----|-------|-----|------|----------|
| W8QEY1     | Lactoferrin OS=Homo sapiens PE=2 SV=1 - [W8QEY1_HUMAN]                                                 | 44.59 | 25 | 38  | 78.33 | 8.2 | 1.71 | 1.78E-04 |
| P30101     | Protein disulfide-isomerase A3 OS=Homo sapiens GN=PDIA3 PE=1 SV=4 - [PDIA3_HUMAN]                      | 70.89 | 27 | 324 | 56.75 | 6.4 | 1.71 | 4.04E-03 |
| A0A024RB99 | Serine hydroxymethyltransferase OS=Homo sapiens GN=SHMT2 PE=3 SV=1 - [A0A024RB99_HUMAN]                | 55.07 | 23 | 78  | 53.42 | 8.1 | 1.71 | 9.29E-03 |
| D6RCD9     | Endosomal/lysosomal potassium channel TMEM175 OS=Homo sapiens GN=TMEM175 PE=1 SV=1 - [D6RCD9_HUMAN]    | 18.06 | 1  | 1   | 7.90  | 4.8 | 1.71 | 1.40E-03 |
| A0A0A0QN99 | Cytochrome b OS=Homo sapiens GN=CYTB PE=3 SV=1 - [A0A0A0QN99_HUMAN]                                    | 4.21  | 1  | 4   | 42.71 | 8.0 | 1.71 | 7.60E-03 |
| A7LNE7     | Cyclin-dependent kinase inhibitor 2A (Fragment) OS=Homo sapiens GN=CDKN2A PE=4 SV=1 - [A7LNE7_HUMAN]   | 11.76 | 1  | 1   | 10.88 | 6.7 | 1.72 | 4.65E-03 |
| Q8IUS5     | Epoxide hydrolase 4 OS=Homo sapiens GN=EPHX4 PE=2 SV=2 - [EPHX4_HUMAN]                                 | 12.98 | 4  | 4   | 42.30 | 8.4 | 1.72 | 5.01E-03 |
| P35232     | Prohibitin OS=Homo sapiens GN=PHB PE=1 SV=1 - [PHB_HUMAN]                                              | 76.47 | 1  | 171 | 29.79 | 5.8 | 1.72 | 7.36E-03 |
| A0A172Q3A0 | Fibroblast activation protein (Fragment) OS=Homo sapiens PE=2 SV=1 - [A0A172Q3A0_HUMAN]                | 4.77  | 3  | 3   | 84.82 | 6.6 | 1.72 | 8.96E-04 |
| E5RIK9     | Transcription termination factor 3, mitochondrial OS=Homo sapiens GN=MTERF3 PE=1 SV=1 - [E5RIK9_HUMAN] | 12.47 | 5  | 5   | 41.54 | 9.1 | 1.72 | 1.71E-02 |
| Q9HD23     | Magnesium transporter MRS2 homolog, mitochondrial OS=Homo sapiens GN=MRS2 PE=1 SV=1 - [MRS2_HUMAN]     | 14    | 5  | 7   | 50.29 | 6.9 | 1.72 | 2.01E-03 |



|            |                                                                                                                                                                                                                          |       |    |     |        |     |      |          |
|------------|--------------------------------------------------------------------------------------------------------------------------------------------------------------------------------------------------------------------------|-------|----|-----|--------|-----|------|----------|
| Q09LL4     | CD40 (Fragment) OS=Homo sapiens PE=4 SV=1 - [Q09LL4_HUMAN]                                                                                                                                                               | 7.69  | 1  | 1   | 13.15  | 5.2 | 1.72 | 2.05E-03 |
| B3KTD5     | cDNA FLJ38083 fis, clone CTONG2016408, highly similar to UBX domain-containing protein 2 OS=Homo sapiens PE=2 SV=1 - [B3KTD5_HUMAN]                                                                                      | 10.95 | 3  | 5   | 31.26  | 9.5 | 1.72 | 1.58E-03 |
| Q13433     | Zinc transporter ZIP6 OS=Homo sapiens GN=SLC39A6 PE=1 SV=3 - [S39A6_HUMAN]                                                                                                                                               | 1.19  | 1  | 1   | 84.99  | 6.9 | 1.72 | 1.83E-03 |
| B2R921     | cDNA, FLJ94171, highly similar to Homo sapiens solute carrier family 25 (mitochondrial carrier; ornithine transporter) member 15 (SLC25A15), nuclear gene encoding mitochondrial protein, mRNA OS=Homo sapiens PE=2 SV=2 | 29.24 | 9  | 22  | 32.77  | 9.3 | 1.72 | 6.18E-03 |
| Q9NRK6     | ATP-binding cassette sub-family B member 10, mitochondrial OS=Homo sapiens GN=ABCB10 PE=1 SV=2 - [ABCBA_HUMAN]                                                                                                           | 24.53 | 16 | 31  | 79.10  | 9.8 | 1.72 | 2.88E-03 |
| I3L0K6     | A-kinase anchor protein 1, mitochondrial (Fragment) OS=Homo sapiens GN=AKAP1 PE=1 SV=1 - [I3L0K6_HUMAN]                                                                                                                  | 24.09 | 2  | 2   | 15.08  | 7.4 | 1.72 | 6.76E-03 |
| A0A087WUQ6 | Glutathione peroxidase OS=Homo sapiens GN=GPX1 PE=1 SV=1 - [A0A087WUQ6_HUMAN]                                                                                                                                            | 61.88 | 10 | 38  | 21.92  | 6.6 | 1.73 | 6.75E-03 |
| P28288     | ATP-binding cassette sub-family D member 3 OS=Homo sapiens GN=ABCD3 PE=1 SV=1 - [ABCD3_HUMAN]                                                                                                                            | 19.88 | 12 | 41  | 75.43  | 9.4 | 1.73 | 3.97E-03 |
| Q9Y4L1     | Hypoxia up-regulated protein 1 OS=Homo sapiens GN=HYOU1 PE=1 SV=1 - [HYOU1_HUMAN]                                                                                                                                        | 50.05 | 39 | 137 | 111.27 | 5.2 | 1.73 | 7.07E-04 |
| Q15797     | Mothers against decapentaplegic homolog 1 OS=Homo sapiens GN=SMAD1 PE=1 SV=1 - [SMAD1_HUMAN]                                                                                                                             | 3.01  | 1  | 1   | 52.23  | 7.3 | 1.73 | 3.47E-02 |
| B4E2Z3     | cDNA FLJ54090, highly similar to 4F2 cell-surface antigen heavy chain OS=Homo sapiens PE=2 SV=1 - [B4E2Z3_HUMAN]                                                                                                         | 25.24 | 11 | 26  | 55.90  | 5.2 | 1.73 | 1.00E-02 |

|            |                                                                                                                                |       |    |     |        |     |      |          |
|------------|--------------------------------------------------------------------------------------------------------------------------------|-------|----|-----|--------|-----|------|----------|
| H0YBQ8     | Disintegrin and metalloproteinase domain-containing protein 28 (Fragment) OS=Homo sapiens GN=ADAM28 PE=1 SV=1 - [H0YBQ8_HUMAN] | 4.6   | 1  | 1   | 19.33  | 8.0 | 1.74 | 2.67E-02 |
| Q9Y3D2     | Methionine-R-sulfoxide reductase B2, mitochondrial OS=Homo sapiens GN=MSRB2 PE=1 SV=2 - [MSRB2_HUMAN]                          | 12.64 | 2  | 2   | 19.52  | 8.6 | 1.74 | 1.08E-03 |
| A0A087X1K9 | Acyl-protein thioesterase 1 OS=Homo sapiens GN=LYPLA1 PE=1 SV=1 - [A0A087X1K9_HUMAN]                                           | 34.94 | 4  | 7   | 17.97  | 5.1 | 1.74 | 3.40E-03 |
| Q96BR5     | Cytochrome c oxidase assembly factor 7 OS=Homo sapiens GN=COA7 PE=1 SV=2 - [COA7_HUMAN]                                        | 22.08 | 5  | 8   | 25.69  | 6.0 | 1.74 | 3.01E-03 |
| P54886     | Delta-1-pyrroline-5-carboxylate synthase OS=Homo sapiens GN=ALDH18A1 PE=1 SV=2 - [P5CS_HUMAN]                                  | 51.07 | 33 | 72  | 87.25  | 7.1 | 1.74 | 3.42E-03 |
| Q9NSE4     | Isoleucine--tRNA ligase, mitochondrial OS=Homo sapiens GN=IARS2 PE=1 SV=2 - [SYIM_HUMAN]                                       | 42.39 | 37 | 149 | 113.72 | 7.2 | 1.74 | 8.90E-03 |
| Q53GR7     | Solute carrier family 25, member 13 (Citrin) variant (Fragment) OS=Homo sapiens PE=2 SV=1 - [Q53GR7_HUMAN]                     | 50.37 | 20 | 93  | 74.07  | 8.4 | 1.74 | 3.20E-03 |
| O43837     | Isocitrate dehydrogenase [NAD] subunit beta, mitochondrial OS=Homo sapiens GN=IDH3B PE=1 SV=2 - [IDH3B_HUMAN]                  | 41.56 | 13 | 43  | 42.16  | 8.5 | 1.75 | 8.69E-03 |
| K7EIE9     | Tyrosine-protein phosphatase non-receptor type 2 (Fragment) OS=Homo sapiens GN=PTPN2 PE=1 SV=1 - [K7EIE9_HUMAN]                | 7.28  | 1  | 1   | 17.74  | 9.7 | 1.75 | 4.56E-02 |
| H7C285     | Tetraspanin-15 (Fragment) OS=Homo sapiens GN=TSPAN15 PE=1 SV=1 - [H7C285_HUMAN]                                                | 12.5  | 2  | 5   | 18.21  | 5.1 | 1.75 | 1.94E-03 |
| Q7L0Y3     | Mitochondrial ribonuclease P protein 1 OS=Homo sapiens GN=TRMT10C PE=1 SV=2 - [MRRP1_HUMAN]                                    | 55.58 | 23 | 67  | 47.32  | 9.4 | 1.75 | 2.37E-03 |

|            |                                                                                                                  |       |    |    |        |     |      |          |
|------------|------------------------------------------------------------------------------------------------------------------|-------|----|----|--------|-----|------|----------|
| Q5T0Y8     | Acid sphingomyelinase-like phosphodiesterase 3b (Fragment) OS=Homo sapiens GN=SMPDL3B PE=1 SV=1 - [Q5T0Y8_HUMAN] | 8.55  | 1  | 1  | 29.51  | 4.9 | 1.76 | 3.09E-03 |
| P27701     | CD82 antigen OS=Homo sapiens GN=CD82 PE=1 SV=1 - [CD82_HUMAN]                                                    | 8.99  | 2  | 3  | 29.61  | 5.2 | 1.76 | 9.40E-03 |
| Q53GL1     | Nicotinamide-nucleotide adenylyltransferase (Fragment) OS=Homo sapiens PE=2 SV=1 - [Q53GL1_HUMAN]                | 21.86 | 5  | 9  | 31.90  | 8.9 | 1.76 | 3.90E-03 |
| A0A0S2Z5Q3 | Sulfatase modifying factor 2 isoform 2 OS=Homo sapiens GN=SUMF2 PE=2 SV=1 - [A0A0S2Z5Q3_HUMAN]                   | 37.87 | 3  | 15 | 30.81  | 6.9 | 1.76 | 1.55E-03 |
| F8VV56     | CD63 antigen OS=Homo sapiens GN=CD63 PE=1 SV=1 - [F8VV56_HUMAN]                                                  | 20.69 | 3  | 10 | 16.01  | 7.9 | 1.76 | 7.95E-03 |
| O95470     | Sphingosine-1-phosphate lyase 1 OS=Homo sapiens GN=SGPL1 PE=1 SV=3 - [SGPL1_HUMAN]                               | 33.98 | 17 | 31 | 63.48  | 9.2 | 1.76 | 8.30E-03 |
| B7Z7P4     | cDNA FLJ53627, highly similar to Antigen peptide transporter 1 OS=Homo sapiens PE=2 SV=1 - [B7Z7P4_HUMAN]        | 30.71 | 10 | 15 | 59.90  | 5.6 | 1.76 | 5.54E-03 |
| Q9BQP7     | Mitochondrial genome maintenance exonuclease 1 OS=Homo sapiens GN=MGME1 PE=1 SV=1 - [MGME1_HUMAN]                | 30.23 | 9  | 17 | 39.40  | 7.7 | 1.76 | 1.07E-02 |
| Q9UGM3     | Deleted in malignant brain tumors 1 protein OS=Homo sapiens GN=DMBT1 PE=1 SV=2 - [DMBT1_HUMAN]                   | 6.96  | 1  | 1  | 260.57 | 5.4 | 1.77 | 7.63E-03 |
| Q8WY22     | BRI3-binding protein OS=Homo sapiens GN=BRI3BP PE=1 SV=1 - [BRI3B_HUMAN]                                         | 6.77  | 1  | 2  | 27.82  | 9.4 | 1.77 | 1.11E-02 |
| B4DLN1     | Uncharacterized protein OS=Homo sapiens PE=2 SV=1 - [B4DLN1_HUMAN]                                               | 24.43 | 3  | 30 | 48.07  | 9.5 | 1.77 | 1.22E-02 |

|        |                                                                                                                                             |       |    |     |        |      |      |          |
|--------|---------------------------------------------------------------------------------------------------------------------------------------------|-------|----|-----|--------|------|------|----------|
| P26447 | Protein S100-A4 OS=Homo sapiens GN=S100A4 PE=1 SV=1 - [S10A4_HUMAN]                                                                         | 35.64 | 4  | 8   | 11.72  | 6.1  | 1.77 | 1.44E-02 |
| O15427 | Monocarboxylate transporter 4 OS=Homo sapiens GN=SLC16A3 PE=1 SV=1 - [MOT4_HUMAN]                                                           | 9.89  | 4  | 7   | 49.44  | 8.0  | 1.77 | 7.41E-03 |
| K7EM09 | Transmembrane protein 205 (Fragment) OS=Homo sapiens GN=TMEM205 PE=1 SV=1 - [K7EM09_HUMAN]                                                  | 25    | 2  | 10  | 13.38  | 8.1  | 1.77 | 7.04E-03 |
| P11021 | 78 kDa glucose-regulated protein OS=Homo sapiens GN=HSPA5 PE=1 SV=2 - [GRP78_HUMAN]                                                         | 56.73 | 35 | 376 | 72.29  | 5.2  | 1.77 | 1.87E-04 |
| H0YDQ1 | Probable dolichyl pyrophosphate Glc1Man9GlcNAc2 alpha-1,3-glucosyltransferase (Fragment) OS=Homo sapiens GN=ALG8 PE=1 SV=1 - [H0YDQ1_HUMAN] | 10.34 | 1  | 2   | 9.78   | 10.1 | 1.77 | 4.84E-03 |
| P27144 | Adenylate kinase 4, mitochondrial OS=Homo sapiens GN=AK4 PE=1 SV=1 - [KAD4_HUMAN]                                                           | 57.4  | 11 | 36  | 25.25  | 8.4  | 1.78 | 5.67E-03 |
| E5RH34 | CMP-N-acetylneuraminate-beta-galactosamide-alpha-2,3-sialyltransferase 1 (Fragment) OS=Homo sapiens GN=ST3GAL1 PE=1 SV=1 - [E5RH34_HUMAN]   | 15.28 | 1  | 1   | 8.50   | 10.4 | 1.78 | 7.72E-03 |
| Q9Y3D9 | 28S ribosomal protein S23, mitochondrial OS=Homo sapiens GN=MRPS23 PE=1 SV=2 - [RT23_HUMAN]                                                 | 40.53 | 7  | 24  | 21.76  | 8.9  | 1.78 | 1.06E-03 |
| H9LP39 | Cytochrome c oxidase subunit 1 OS=Homo sapiens GN=COX1 PE=3 SV=1 - [H9LP39_HUMAN]                                                           | 6.04  | 1  | 1   | 57.01  | 6.7  | 1.79 | 2.44E-03 |
| O43295 | SLIT-ROBO Rho GTPase-activating protein 3 OS=Homo sapiens GN=SRGAP3 PE=1 SV=3 - [SRGP3_HUMAN]                                               | 0.82  | 1  | 1   | 124.43 | 6.7  | 1.79 | 1.32E-02 |
| Q6P161 | 39S ribosomal protein L54, mitochondrial OS=Homo sapiens GN=MRPL54 PE=1 SV=1 - [RM54_HUMAN]                                                 | 48.55 | 3  | 6   | 15.81  | 9.6  | 1.79 | 8.11E-03 |

|            |                                                                                                                                                                                                                   |       |    |     |       |      |      |          |
|------------|-------------------------------------------------------------------------------------------------------------------------------------------------------------------------------------------------------------------|-------|----|-----|-------|------|------|----------|
| A0A059QB80 | ATP synthase subunit a OS=Homo sapiens GN=ATP6<br>PE=4 SV=1 - [A0A059QB80_HUMAN]                                                                                                                                  | 4.42  | 1  | 17  | 24.74 | 10.1 | 1.79 | 6.63E-03 |
| Q8N4H5     | Mitochondrial import receptor subunit TOM5 homolog<br>OS=Homo sapiens GN=TOMM5 PE=1 SV=1 -<br>[TOM5_HUMAN]                                                                                                        | 27.45 | 2  | 4   | 6.03  | 9.7  | 1.79 | 6.95E-03 |
| Q9NX62     | Inositol monophosphatase 3 OS=Homo sapiens<br>GN=IMPAD1 PE=1 SV=1 - [IMPA3_HUMAN]                                                                                                                                 | 8.36  | 4  | 4   | 38.66 | 6.9  | 1.80 | 2.36E-02 |
| P28838     | Cytosol aminopeptidase OS=Homo sapiens GN=LAP3<br>PE=1 SV=3 - [AMPL_HUMAN]                                                                                                                                        | 63.97 | 27 | 84  | 56.13 | 7.9  | 1.80 | 2.08E-03 |
| A8K651     | cDNA FLJ75700, highly similar to Homo sapiens<br>complement component 1, q subcomponent binding protein<br>(C1QBP), nuclear gene encoding mitochondrial protein,<br>mRNA OS=Homo sapiens PE=2 SV=1 [A8K651_HUMAN] | 31.56 | 6  | 125 | 31.36 | 4.8  | 1.80 | 4.10E-03 |
| P68402     | Platelet-activating factor acetylhydrolase IB subunit beta<br>OS=Homo sapiens GN=PFAFH1B2 PE=1 SV=1 -<br>[PA1B2_HUMAN]                                                                                            | 12.23 | 2  | 3   | 25.55 | 5.9  | 1.80 | 3.25E-02 |
| H0YHH1     | Uncharacterized protein (Fragment) OS=Homo sapiens<br>PE=4 SV=1 - [H0YHH1_HUMAN]                                                                                                                                  | 9.01  | 1  | 1   | 12.17 | 7.3  | 1.80 | 5.35E-03 |
| E9PE17     | 28S ribosomal protein S17, mitochondrial (Fragment)<br>OS=Homo sapiens GN=MRPS17 PE=1 SV=1 -<br>[E9PE17_HUMAN]                                                                                                    | 51.94 | 4  | 10  | 14.36 | 9.8  | 1.81 | 1.52E-03 |
| Q6DN12     | Multiple C2 and transmembrane domain-containing protein<br>2 OS=Homo sapiens GN=MCTP2 PE=1 SV=3 -<br>[MCTP2_HUMAN]                                                                                                | 1.37  | 1  | 1   | 99.53 | 7.6  | 1.81 | 1.78E-04 |
| P13667     | Protein disulfide-isomerase A4 OS=Homo sapiens<br>GN=PDIA4 PE=1 SV=2 - [PDIA4_HUMAN]                                                                                                                              | 61.71 | 42 | 268 | 72.89 | 5.1  | 1.81 | 4.52E-03 |
| P30040     | Endoplasmic reticulum resident protein 29 OS=Homo<br>sapiens GN=ERP29 PE=1 SV=4 - [ERP29_HUMAN]                                                                                                                   | 47.89 | 13 | 62  | 28.98 | 7.3  | 1.81 | 5.45E-03 |

|            |                                                                                                                                                    |       |   |    |       |      |      |          |
|------------|----------------------------------------------------------------------------------------------------------------------------------------------------|-------|---|----|-------|------|------|----------|
| K7ER12     | UPF0449 protein C19orf25 (Fragment) OS=Homo sapiens<br>GN=C19orf25 PE=1 SV=2 - [K7ER12_HUMAN]                                                      | 47.62 | 1 | 1  | 4.51  | 6.6  | 1.82 | 8.72E-03 |
| B4DEK8     | Tetraspanin OS=Homo sapiens PE=2 SV=1 -<br>[B4DEK8_HUMAN]                                                                                          | 6.51  | 2 | 3  | 23.97 | 7.2  | 1.82 | 3.56E-03 |
| A0A0G2JMH6 | HLA class II histocompatibility antigen, DR alpha chain<br>OS=Homo sapiens GN=HLA-DRA PE=1 SV=1 -<br>[A0A0G2JMH6_HUMAN]                            | 32.68 | 2 | 47 | 28.60 | 5.0  | 1.82 | 8.26E-04 |
| L0R8F8     | Alternative protein SMCR7L OS=Homo sapiens<br>GN=SMCR7L PE=3 SV=1 - [L0R8F8_HUMAN]                                                                 | 11.43 | 1 | 1  | 8.44  | 10.6 | 1.82 | 3.23E-03 |
| Q8TD06     | Anterior gradient protein 3 OS=Homo sapiens GN=AGR3<br>PE=1 SV=1 - [AGR3_HUMAN]                                                                    | 45.18 | 6 | 11 | 19.16 | 8.0  | 1.82 | 6.74E-03 |
| Q8NF37     | Lysophosphatidylcholine acyltransferase 1 OS=Homo<br>sapiens GN=LPCAT1 PE=1 SV=2 - [PCAT1_HUMAN]                                                   | 12.36 | 6 | 7  | 59.11 | 6.0  | 1.82 | 2.36E-03 |
| B4DT82     | cDNA FLJ50662, highly similar to Solute carrier family 2,<br>facilitated glucosetransporter member 5 OS=Homo sapiens<br>PE=2 SV=1 - [B4DT82_HUMAN] | 3.11  | 1 | 1  | 42.26 | 6.4  | 1.82 | 7.40E-03 |
| O43715     | TP53-regulated inhibitor of apoptosis 1 OS=Homo sapiens<br>GN=TRIAP1 PE=1 SV=1 - [TRIA1_HUMAN]                                                     | 17.11 | 1 | 1  | 8.78  | 5.5  | 1.82 | 4.70E-04 |
| A0A0K0KSD4 | MHC class I antigen (Fragment) OS=Homo sapiens<br>GN=HLA-C PE=3 SV=1 - [A0A0K0KSD4_HUMAN]                                                          | 48.62 | 1 | 13 | 21.22 | 7.9  | 1.82 | 5.58E-03 |
| Q96RQ9     | L-amino-acid oxidase OS=Homo sapiens GN=IL4I1 PE=1<br>SV=1 - [OXLA_HUMAN]                                                                          | 13.76 | 6 | 13 | 62.84 | 8.7  | 1.82 | 8.40E-03 |
| V9HW35     | Epididymis secretory protein Li 55 OS=Homo sapiens<br>GN=HEL-S-55 PE=2 SV=1 - [V9HW35_HUMAN]                                                       | 59.26 | 8 | 58 | 17.02 | 7.2  | 1.83 | 4.19E-03 |

|            |                                                                                                                                   |       |    |     |       |     |      |          |
|------------|-----------------------------------------------------------------------------------------------------------------------------------|-------|----|-----|-------|-----|------|----------|
| A0A024R755 | Calumenin, isoform CRA_a OS=Homo sapiens GN=CALU PE=4 SV=1 - [A0A024R755_HUMAN]                                                   | 43.17 | 3  | 35  | 37.11 | 4.6 | 1.83 | 3.50E-03 |
| Q9Y6X5     | Bis(5'-adenosyl)-triphosphatase ENPP4 OS=Homo sapiens GN=ENPP4 PE=1 SV=3 - [ENPP4_HUMAN]                                          | 4.64  | 2  | 2   | 51.61 | 6.2 | 1.83 | 2.89E-03 |
| P49448     | Glutamate dehydrogenase 2, mitochondrial OS=Homo sapiens GN=GLUD2 PE=1 SV=2 - [DHE4_HUMAN]                                        | 38.89 | 3  | 81  | 61.40 | 8.5 | 1.83 | 1.38E-03 |
| Q9P1F3     | Costars family protein ABRACL OS=Homo sapiens GN=ABRACL PE=1 SV=1 - [ABRAL_HUMAN]                                                 | 16.05 | 1  | 1   | 9.05  | 6.3 | 1.83 | 4.65E-03 |
| P05141     | ADP/ATP translocase 2 OS=Homo sapiens GN=SLC25A5 PE=1 SV=7 - [ADT2_HUMAN]                                                         | 49.66 | 6  | 304 | 32.83 | 9.7 | 1.84 | 1.21E-03 |
| N1NSB5     | MHC class II antigen (Fragment) OS=Homo sapiens GN=HLA-DRB1 PE=4 SV=1 - [N1NSB5_HUMAN]                                            | 52.81 | 2  | 10  | 10.89 | 6.5 | 1.84 | 1.55E-03 |
| G5E9P5     | 39S ribosomal protein L52, mitochondrial OS=Homo sapiens GN=MRPL52 PE=1 SV=1 - [G5E9P5_HUMAN]                                     | 30    | 1  | 1   | 11.67 | 9.5 | 1.84 | 2.19E-02 |
| A8K4A8     | cDNA FLJ76156, highly similar to Homo sapiens aspartyl-tRNA synthetase 2 (DARS2), mRNA OS=Homo sapiens PE=2 SV=1 - [A8K4A8_HUMAN] | 33.33 | 16 | 47  | 73.53 | 7.8 | 1.84 | 6.40E-03 |
| M0QXC5     | Napsin-A (Fragment) OS=Homo sapiens GN=NAPSA PE=1 SV=1 - [M0QXC5_HUMAN]                                                           | 2.61  | 1  | 1   | 29.09 | 6.4 | 1.84 | 8.08E-04 |
| Q96ES6     | Major facilitator superfamily domain-containing protein 3 OS=Homo sapiens GN=MFSD3 PE=2 SV=1 - [MFSD3_HUMAN]                      | 2.18  | 1  | 1   | 42.67 | 9.2 | 1.84 | 4.98E-03 |
| B4DPP0     | cDNA FLJ51032, highly similar to CD9 antigen OS=Homo sapiens PE=2 SV=1 - [B4DPP0_HUMAN]                                           | 17.02 | 3  | 11  | 15.90 | 6.7 | 1.84 | 1.92E-04 |

|        |                                                                                                                                                  |       |    |     |       |      |      |          |
|--------|--------------------------------------------------------------------------------------------------------------------------------------------------|-------|----|-----|-------|------|------|----------|
| E5RJK7 | LYR motif-containing protein 2 OS=Homo sapiens<br>GN=LYRM2 PE=1 SV=1 - [E5RJK7_HUMAN]                                                            | 11.11 | 1  | 1   | 8.64  | 11.2 | 1.85 | 3.85E-03 |
| B4DLK5 | cDNA FLJ51600, highly similar to Cytochrome P450 1B1<br>(EC 1.14.14.1) OS=Homo sapiens PE=2 SV=1 -<br>[B4DLK5_HUMAN]                             | 28.4  | 11 | 17  | 46.68 | 7.1  | 1.85 | 3.24E-04 |
| Q9BUP3 | Oxidoreductase HTATIP2 OS=Homo sapiens GN=HTATIP2<br>PE=1 SV=2 - [HTAI2_HUMAN]                                                                   | 30.58 | 6  | 9   | 27.03 | 8.4  | 1.85 | 3.72E-04 |
| F8VZY9 | Keratin, type I cytoskeletal 18 OS=Homo sapiens<br>GN=KRT18 PE=1 SV=1 - [F8VZY9_HUMAN]                                                           | 37.6  | 13 | 23  | 43.75 | 5.4  | 1.86 | 7.05E-03 |
| O15320 | cTAGE family member 5 OS=Homo sapiens GN=CTAGE5<br>PE=1 SV=4 - [CTGE5_HUMAN]                                                                     | 21.14 | 13 | 22  | 90.94 | 5.2  | 1.86 | 1.35E-02 |
| Q6UX53 | Methyltransferase-like protein 7B OS=Homo sapiens<br>GN=METTL7B PE=1 SV=2 - [MET7B_HUMAN]                                                        | 18.03 | 4  | 5   | 27.76 | 8.4  | 1.86 | 7.92E-03 |
| Q9BS26 | Endoplasmic reticulum resident protein 44 OS=Homo<br>sapiens GN=ERP44 PE=1 SV=1 - [ERP44_HUMAN]                                                  | 30.05 | 11 | 25  | 46.94 | 5.3  | 1.86 | 3.62E-04 |
| P61604 | 10 kDa heat shock protein, mitochondrial OS=Homo<br>sapiens GN=HSPE1 PE=1 SV=2 - [CH10_HUMAN]                                                    | 83.33 | 10 | 140 | 10.92 | 8.9  | 1.86 | 3.10E-03 |
| Q9BQ13 | BTB/POZ domain-containing protein KCTD14 OS=Homo<br>sapiens GN=KCTD14 PE=1 SV=2 - [KCD14_HUMAN]                                                  | 9.41  | 2  | 3   | 29.57 | 8.6  | 1.87 | 1.11E-02 |
| B2R7I0 | cDNA, FLJ93451, highly similar to Homo sapiens<br>thioredoxin domain containing 14 (TXNDC14), mRNA<br>OS=Homo sapiens PE=2 SV=1 - [B2R7I0_HUMAN] | 22.97 | 7  | 9   | 34.00 | 8.7  | 1.87 | 1.55E-05 |
| H7BZJ3 | Protein disulfide-isomerase A3 (Fragment) OS=Homo<br>sapiens GN=PDIA3 PE=1 SV=1 - [H7BZJ3_HUMAN]                                                 | 74.8  | 1  | 58  | 13.51 | 7.3  | 1.87 | 1.35E-03 |



|        |                                                                                                                                                     |       |    |    |       |     |      |          |
|--------|-----------------------------------------------------------------------------------------------------------------------------------------------------|-------|----|----|-------|-----|------|----------|
| O14548 | Cytochrome c oxidase subunit 7A-related protein, mitochondrial OS=Homo sapiens GN=COX7A2L PE=1 SV=2 - [COX7R_HUMAN]                                 | 54.39 | 4  | 8  | 12.61 | 9.4 | 1.88 | 5.33E-03 |
| Q14257 | Reticulocalbin-2 OS=Homo sapiens GN=RCN2 PE=1 SV=1 - [RCN2_HUMAN]                                                                                   | 35.33 | 7  | 23 | 36.85 | 4.4 | 1.88 | 2.53E-04 |
| B2R7D7 | cDNA, FLJ93394, highly similar to Homo sapiens anterior gradient 2 homolog (Xenopus laevis) (AGR2), mRNA OS=Homo sapiens PE=2 SV=1 - [B2R7D7_HUMAN] | 33.71 | 5  | 12 | 19.99 | 9.0 | 1.88 | 4.31E-04 |
| Q59F54 | Solute carrier family 2 (Facilitated glucose transporter), member 3 variant (Fragment) OS=Homo sapiens PE=2 SV=1 - [Q59F54_HUMAN]                   | 3.11  | 1  | 1  | 31.85 | 5.9 | 1.88 | 7.41E-04 |
| Q96RP9 | Elongation factor G, mitochondrial OS=Homo sapiens GN=GFM1 PE=1 SV=2 - [EFGM_HUMAN]                                                                 | 36.22 | 25 | 56 | 83.42 | 7.0 | 1.88 | 9.21E-04 |
| Q9Y5U9 | Immediate early response 3-interacting protein 1 OS=Homo sapiens GN=IER3IP1 PE=1 SV=1 - [IR3IP_HUMAN]                                               | 24.39 | 1  | 1  | 8.96  | 8.2 | 1.88 | 5.31E-04 |
| H9E7B8 | Cytochrome c oxidase subunit 2 (Fragment) OS=Homo sapiens GN=COX2 PE=3 SV=1 - [H9E7B8_HUMAN]                                                        | 27.27 | 1  | 65 | 24.84 | 4.7 | 1.88 | 1.97E-02 |
| B4DKE6 | cDNA FLJ60629, highly similar to Replication factor C subunit 3 OS=Homo sapiens PE=2 SV=1 - [B4DKE6_HUMAN]                                          | 5.9   | 1  | 1  | 34.81 | 8.6 | 1.89 | 1.26E-03 |
| U6FVB0 | Tyrosine-protein kinase receptor OS=Homo sapiens GN=CD74-Ntrk1 fusion gene PE=2 SV=1 - [U6FVB0_HUMAN]                                               | 13.88 | 9  | 21 | 70.29 | 8.1 | 1.89 | 3.00E-03 |
| P50443 | Sulfate transporter OS=Homo sapiens GN=SLC26A2 PE=1 SV=2 - [S26A2_HUMAN]                                                                            | 2.57  | 2  | 2  | 81.61 | 8.4 | 1.89 | 4.48E-02 |
| B2R6X6 | Peptidyl-prolyl cis-trans isomerase OS=Homo sapiens PE=2 SV=1 - [B2R6X6_HUMAN]                                                                      | 39.13 | 6  | 28 | 22.03 | 9.5 | 1.89 | 7.39E-05 |

|        |                                                                                                                        |       |   |    |        |     |      |          |
|--------|------------------------------------------------------------------------------------------------------------------------|-------|---|----|--------|-----|------|----------|
| P78310 | Coxsackievirus and adenovirus receptor OS=Homo sapiens<br>GN=CXADR PE=1 SV=1 - [CXAR_HUMAN]                            | 11.78 | 4 | 4  | 40.00  | 7.6 | 1.90 | 6.11E-03 |
| Q5TC12 | ATP synthase mitochondrial F1 complex assembly factor 1<br>OS=Homo sapiens GN=ATPAF1 PE=1 SV=1 -<br>[ATPF1_HUMAN]      | 29.57 | 8 | 17 | 36.41  | 8.0 | 1.90 | 9.90E-03 |
| D6REQ6 | Ribonuclease T2 OS=Homo sapiens GN=RNASET2 PE=1<br>SV=1 - [D6REQ6_HUMAN]                                               | 18.81 | 3 | 5  | 25.29  | 6.1 | 1.90 | 1.28E-02 |
| Q92685 | Dol-P-Man:Man(5)GlcNAc(2)-PP-Dol alpha-1,3-<br>mannosyltransferase OS=Homo sapiens GN=ALG3 PE=1<br>SV=1 - [ALG3_HUMAN] | 9.36  | 4 | 6  | 50.09  | 9.4 | 1.91 | 3.91E-03 |
| P59665 | Neutrophil defensin 1 OS=Homo sapiens GN=DEFA1 PE=1<br>SV=1 - [DEF1_HUMAN]                                             | 19.15 | 2 | 14 | 10.19  | 7.0 | 1.91 | 4.30E-02 |
| Q4G148 | Glucoside xylosyltransferase 1 OS=Homo sapiens<br>GN=GXYLT1 PE=1 SV=2 - [GXLT1_HUMAN]                                  | 8.18  | 3 | 5  | 50.53  | 8.6 | 1.92 | 4.44E-04 |
| Q86VC1 | XPO4 protein (Fragment) OS=Homo sapiens GN=XPO4<br>PE=2 SV=1 - [Q86VC1_HUMAN]                                          | 2.9   | 1 | 2  | 93.77  | 4.8 | 1.92 | 1.42E-02 |
| P54687 | Branched-chain-amino-acid aminotransferase, cytosolic<br>OS=Homo sapiens GN=BCAT1 PE=1 SV=3 -<br>[BCAT1_HUMAN]         | 5.44  | 2 | 2  | 42.94  | 5.3 | 1.92 | 1.96E-03 |
| P58107 | Epiplakin OS=Homo sapiens GN=EPPK1 PE=1 SV=2 -<br>[EPIPL_HUMAN]                                                        | 8.39  | 2 | 13 | 555.28 | 5.6 | 1.93 | 1.62E-03 |
| O60613 | 15 kDa selenoprotein OS=Homo sapiens GN=SEP15 PE=1<br>SV=3 - [SEP15_HUMAN]                                             | 19.75 | 3 | 8  | 17.78  | 5.0 | 1.93 | 1.12E-03 |
| O95881 | Thioredoxin domain-containing protein 12 OS=Homo<br>sapiens GN=TXNDC12 PE=1 SV=1 - [TXD12_HUMAN]                       | 31.4  | 5 | 24 | 19.19  | 5.4 | 1.93 | 6.49E-04 |

|            |                                                                                                  |       |    |     |        |     |      |          |
|------------|--------------------------------------------------------------------------------------------------|-------|----|-----|--------|-----|------|----------|
| A0A172Q3A8 | Folate receptor (Fragment) OS=Homo sapiens PE=2 SV=1 - [A0A172Q3A8_HUMAN]                        | 17.87 | 4  | 15  | 24.27  | 7.8 | 1.93 | 3.23E-03 |
| A0PJ86     | ACPP protein (Fragment) OS=Homo sapiens GN=ACPP PE=2 SV=1 - [A0PJ86_HUMAN]                       | 16.92 | 4  | 6   | 30.34  | 9.2 | 1.94 | 1.02E-02 |
| P06702     | Protein S100-A9 OS=Homo sapiens GN=S100A9 PE=1 SV=1 - [S10A9_HUMAN]                              | 74.56 | 7  | 24  | 13.23  | 6.1 | 1.94 | 2.77E-03 |
| Q8WUY1     | Protein THEM6 OS=Homo sapiens GN=THEM6 PE=1 SV=2 - [THEM6_HUMAN]                                 | 41.83 | 8  | 15  | 23.85  | 9.6 | 1.94 | 6.92E-03 |
| P15924     | Desmoplakin OS=Homo sapiens GN=DSP PE=1 SV=3 - [DESP_HUMAN]                                      | 29.36 | 75 | 124 | 331.57 | 6.8 | 1.94 | 7.87E-04 |
| Q9H488     | GDP-fucose protein O-fucosyltransferase 1 OS=Homo sapiens GN=POFUT1 PE=1 SV=1 - [OFUT1_HUMAN]    | 26.55 | 7  | 16  | 43.93  | 8.5 | 1.94 | 3.20E-05 |
| Q8NBK3     | Sulfatase-modifying factor 1 OS=Homo sapiens GN=SUMF1 PE=1 SV=3 - [SUMF1_HUMAN]                  | 12.3  | 4  | 5   | 40.53  | 6.7 | 1.94 | 2.60E-03 |
| B1ALH6     | Phytanoyl-CoA dioxygenase, peroxisomal OS=Homo sapiens GN=PHYH PE=1 SV=1 - [B1ALH6_HUMAN]        | 22.74 | 8  | 12  | 36.94  | 8.2 | 1.94 | 7.71E-03 |
| P36222     | Chitinase-3-like protein 1 OS=Homo sapiens GN=CHI3L1 PE=1 SV=2 - [CH3L1_HUMAN]                   | 20.63 | 7  | 9   | 42.60  | 8.5 | 1.94 | 7.51E-04 |
| Q05CP8     | CCDC6 protein (Fragment) OS=Homo sapiens GN=CCDC6 PE=2 SV=1 - [Q05CP8_HUMAN]                     | 14.67 | 4  | 4   | 38.14  | 9.4 | 1.95 | 5.92E-04 |
| Q9UBH6     | Xenotropic and polytropic retrovirus receptor 1 OS=Homo sapiens GN=XPR1 PE=1 SV=1 - [XPR1_HUMAN] | 9.91  | 7  | 11  | 81.48  | 8.4 | 1.95 | 5.51E-03 |

|            |                                                                                                                                      |       |    |     |       |      |      |          |
|------------|--------------------------------------------------------------------------------------------------------------------------------------|-------|----|-----|-------|------|------|----------|
| A0A0S2Z580 | Ethylmalonic encephalopathy 1 isoform 2 (Fragment)<br>OS=Homo sapiens GN=ETHE1 PE=2 SV=1 -<br>[A0A0S2Z580_HUMAN]                     | 27.98 | 5  | 15  | 26.63 | 6.8  | 1.95 | 3.34E-03 |
| Q15084     | Protein disulfide-isomerase A6 OS=Homo sapiens<br>GN=PDIA6 PE=1 SV=1 - [PDIA6_HUMAN]                                                 | 58.18 | 18 | 91  | 48.09 | 5.1  | 1.96 | 7.42E-03 |
| A8K335     | cDNA FLJ76254, highly similar to Homo sapiens gamma-<br>glutamyl hydrolase (GGH), mRNA OS=Homo sapiens PE=2<br>SV=1 - [A8K335_HUMAN] | 25.79 | 7  | 12  | 36.02 | 7.4  | 1.97 | 1.43E-02 |
| Q53G71     | Calreticulin variant (Fragment) OS=Homo sapiens PE=2<br>SV=1 - [Q53G71_HUMAN]                                                        | 62.32 | 21 | 156 | 46.89 | 4.4  | 1.98 | 1.19E-02 |
| Q9NY97     | N-acetyllactosaminide beta-1,3-N-<br>acetylglucosaminyltransferase 2 OS=Homo sapiens<br>GN=B3GNT2 PE=1 SV=2 - [B3GN2_HUMAN]          | 2.27  | 1  | 1   | 45.99 | 8.5  | 1.98 | 2.76E-02 |
| O75381     | Peroxisomal membrane protein PEX14 OS=Homo sapiens<br>GN=PEX14 PE=1 SV=1 - [PEX14_HUMAN]                                             | 14.85 | 5  | 7   | 41.21 | 4.9  | 1.99 | 6.51E-04 |
| P17096     | High mobility group protein HMG-I/HMG-Y OS=Homo<br>sapiens GN=HMGA1 PE=1 SV=3 - [HMGA1_HUMAN]                                        | 23.36 | 2  | 3   | 11.67 | 10.3 | 1.99 | 3.92E-03 |
| Q6PI41     | AURKAIP1 protein (Fragment) OS=Homo sapiens<br>GN=AURKAIP1 PE=2 SV=1 - [Q6PI41_HUMAN]                                                | 6.17  | 1  | 3   | 18.65 | 10.5 | 1.99 | 8.96E-04 |
| Q8TAA5     | GrpE protein homolog 2, mitochondrial OS=Homo sapiens<br>GN=GRPEL2 PE=1 SV=1 - [GRPE2_HUMAN]                                         | 7.56  | 2  | 3   | 25.42 | 7.7  | 1.99 | 1.89E-03 |
| P10696     | Alkaline phosphatase, placental-like OS=Homo sapiens<br>GN=ALPPL2 PE=2 SV=4 - [PPBN_HUMAN]                                           | 30.08 | 2  | 20  | 57.34 | 6.3  | 2.01 | 5.16E-03 |
| B6ECB2     | MUC1 isoform J23 OS=Homo sapiens GN=MUC1 PE=2<br>SV=1 - [B6ECB2_HUMAN]                                                               | 21.67 | 3  | 10  | 19.63 | 6.4  | 2.01 | 5.30E-05 |

|            |                                                                                                                       |       |    |     |       |     |      |          |
|------------|-----------------------------------------------------------------------------------------------------------------------|-------|----|-----|-------|-----|------|----------|
| A0A0S2C388 | MHC class II antigen (Fragment) OS=Homo sapiens<br>GN=HLA-DPB1 PE=3 SV=1 - [A0A0S2C388_HUMAN]                         | 25.4  | 5  | 7   | 28.68 | 7.4 | 2.01 | 1.13E-02 |
| P05109     | Protein S100-A8 OS=Homo sapiens GN=S100A8 PE=1<br>SV=1 - [S10A8_HUMAN]                                                | 39.78 | 5  | 9   | 10.83 | 7.0 | 2.01 | 1.21E-02 |
| P48735     | Isocitrate dehydrogenase [NADP], mitochondrial OS=Homo<br>sapiens GN=IDH2 PE=1 SV=2 - [IDHP_HUMAN]                    | 56.64 | 27 | 355 | 50.88 | 8.7 | 2.02 | 2.07E-03 |
| A0A075B746 | 28S ribosomal protein S21, mitochondrial OS=Homo<br>sapiens GN=MRPS21 PE=1 SV=1 -<br>[A0A075B746_HUMAN]               | 39.08 | 3  | 6   | 10.68 | 9.9 | 2.02 | 3.18E-03 |
| C7DJS2     | Glutathione S-transferase pi (Fragment) OS=Homo sapiens<br>GN=GSTP1 PE=2 SV=1 - [C7DJS2_HUMAN]                        | 42.38 | 1  | 14  | 16.66 | 5.1 | 2.02 | 3.78E-02 |
| Q8TCD1     | UPF0729 protein C18orf32 OS=Homo sapiens<br>GN=C18orf32 PE=3 SV=1 - [CR032_HUMAN]                                     | 23.68 | 2  | 2   | 8.66  | 9.1 | 2.02 | 2.49E-02 |
| O19697     | Hla-dalpha partial alpha 2 domain (extra cellular domain)<br>(Fragment) OS=Homo sapiens PE=4 SV=1 -<br>[O19697_HUMAN] | 90.63 | 1  | 11  | 3.84  | 5.1 | 2.03 | 2.45E-03 |
| Q86YS6     | Ras-related protein Rab-43 OS=Homo sapiens GN=RAB43<br>PE=1 SV=1 - [RAB43_HUMAN]                                      | 24.06 | 3  | 7   | 23.32 | 5.6 | 2.03 | 2.07E-03 |
| K7ELD9     | Synaptogyrin-2 OS=Homo sapiens GN=SYNGR2 PE=1<br>SV=1 - [K7ELD9_HUMAN]                                                | 12.31 | 1  | 1   | 6.74  | 9.4 | 2.04 | 1.02E-04 |
| I3L3M4     | Uncharacterized protein OS=Homo sapiens PE=4 SV=1 -<br>[I3L3M4_HUMAN]                                                 | 20.48 | 1  | 1   | 8.83  | 4.8 | 2.05 | 2.84E-03 |
| Q8IZV5     | Retinol dehydrogenase 10 OS=Homo sapiens GN=RDH10<br>PE=1 SV=1 - [RDH10_HUMAN]                                        | 12.32 | 4  | 7   | 38.06 | 7.4 | 2.05 | 2.12E-03 |

|            |                                                                                                                                                   |       |   |     |       |     |      |          |
|------------|---------------------------------------------------------------------------------------------------------------------------------------------------|-------|---|-----|-------|-----|------|----------|
| A0A087WYU6 | Lysophosphatidic acid phosphatase type 6 (Fragment)<br>OS=Homo sapiens GN=ACP6 PE=1 SV=1 -<br>[A0A087WYU6_HUMAN]                                  | 28.92 | 3 | 4   | 18.94 | 7.3 | 2.05 | 1.77E-03 |
| P23786     | Carnitine O-palmitoyltransferase 2, mitochondrial OS=Homo sapiens GN=CPT2 PE=1 SV=2 - [CPT2_HUMAN]                                                | 42.4  | 5 | 77  | 73.73 | 8.2 | 2.05 | 1.99E-02 |
| Q05BS6     | UNC93B1 protein (Fragment) OS=Homo sapiens GN=UNC93B1 PE=2 SV=1 - [Q05BS6_HUMAN]                                                                  | 6.53  | 3 | 5   | 56.51 | 7.8 | 2.05 | 2.07E-03 |
| S4R329     | ER membrane protein complex subunit 4 OS=Homo sapiens GN=EMC4 PE=1 SV=1 - [S4R329_HUMAN]                                                          | 40.28 | 2 | 3   | 7.80  | 9.8 | 2.06 | 8.58E-04 |
| G3V5T0     | Maleylacetoacetate isomerase OS=Homo sapiens GN=GSTZ1 PE=1 SV=1 - [G3V5T0_HUMAN]                                                                  | 28.71 | 1 | 7   | 22.60 | 7.7 | 2.07 | 8.20E-04 |
| Q5VT66     | Mitochondrial amidoxime-reducing component 1 OS=Homo sapiens GN=MARC1 PE=1 SV=1 - [MARC1_HUMAN]                                                   | 23.44 | 5 | 10  | 37.48 | 8.9 | 2.07 | 3.49E-04 |
| D3DX03     | Amine oxidase OS=Homo sapiens GN=ABP1 PE=3 SV=1 - [D3DX03_HUMAN]                                                                                  | 18.16 | 9 | 11  | 82.68 | 7.2 | 2.08 | 1.44E-03 |
| B4DH65     | cDNA FLJ53323, highly similar to 2-oxoglutarate dehydrogenase E1 component, mitochondrial (EC 1.2.4.2) OS=Homo sapiens PE=2 SV=1 - [B4DH65_HUMAN] | 45.09 | 1 | 124 | 97.63 | 6.8 | 2.08 | 2.19E-03 |
| Q8WYJ5     | Protein kinase C inhibitor-2 OS=Homo sapiens PE=2 SV=1 - [Q8WYJ5_HUMAN]                                                                           | 46.88 | 4 | 16  | 13.91 | 7.0 | 2.09 | 2.49E-04 |
| P51589     | Cytochrome P450 2J2 OS=Homo sapiens GN=CYP2J2 PE=1 SV=2 - [CP2J2_HUMAN]                                                                           | 12.35 | 5 | 6   | 57.57 | 8.6 | 2.09 | 6.55E-03 |
| P13498     | Cytochrome b-245 light chain OS=Homo sapiens GN=CYBA PE=1 SV=3 - [CY24A_HUMAN]                                                                    | 11.28 | 2 | 3   | 21.00 | 9.5 | 2.10 | 9.04E-04 |

|            |                                                                                                                                      |       |    |     |        |      |      |          |
|------------|--------------------------------------------------------------------------------------------------------------------------------------|-------|----|-----|--------|------|------|----------|
| P60468     | Protein transport protein Sec61 subunit beta OS=Homo sapiens GN=SEC61B PE=1 SV=2 - [SC61B_HUMAN]                                     | 44.79 | 4  | 8   | 9.97   | 11.6 | 2.11 | 6.78E-04 |
| A0A0C4DGJ8 | Electron transfer flavoprotein regulatory factor 1 OS=Homo sapiens GN=ETFRF1 PE=1 SV=1 - [A0A0C4DGJ8_HUMAN]                          | 30.68 | 3  | 5   | 10.60  | 9.9  | 2.12 | 2.01E-03 |
| Q56VL3     | OCIA domain-containing protein 2 OS=Homo sapiens GN=OCIAD2 PE=1 SV=1 - [OCAD2_HUMAN]                                                 | 48.7  | 8  | 20  | 16.94  | 9.0  | 2.12 | 1.22E-04 |
| B4DV41     | cDNA FLJ50879, highly similar to Cytochrome P450 4B1 (EC 1.14.14.1) OS=Homo sapiens PE=2 SV=1 - [B4DV41_HUMAN]                       | 13.76 | 2  | 4   | 25.75  | 6.2  | 2.13 | 2.44E-03 |
| Q9Y2Q3     | Glutathione S-transferase kappa 1 OS=Homo sapiens GN=GSTK1 PE=1 SV=3 - [GSTK1_HUMAN]                                                 | 66.37 | 13 | 129 | 25.48  | 8.4  | 2.13 | 4.24E-07 |
| Q8IZF6     | Adhesion G-protein coupled receptor G4 OS=Homo sapiens GN=ADGRG4 PE=2 SV=2 - [AGRG4_HUMAN]                                           | 0.23  | 1  | 1   | 333.16 | 6.2  | 2.13 | 1.40E-03 |
| F8W114     | La-related protein 4 (Fragment) OS=Homo sapiens GN=LARP4 PE=1 SV=1 - [F8W114_HUMAN]                                                  | 8     | 1  | 1   | 14.13  | 4.4  | 2.15 | 2.19E-02 |
| B4DHJ7     | cDNA FLJ60537, highly similar to BCL2/adenovirus E1B 19 kDa protein-interacting protein 3 OS=Homo sapiens PE=2 SV=1 - [B4DHJ7_HUMAN] | 12.22 | 1  | 2   | 19.93  | 6.3  | 2.15 | 2.03E-03 |
| Q96AG4     | Leucine-rich repeat-containing protein 59 OS=Homo sapiens GN=LRRRC59 PE=1 SV=1 - [LRC59_HUMAN]                                       | 46.58 | 15 | 47  | 34.91  | 9.6  | 2.16 | 3.51E-03 |
| H3BSA6     | dCTP pyrophosphatase 1 OS=Homo sapiens GN=DCTPP1 PE=1 SV=1 - [H3BSA6_HUMAN]                                                          | 14.08 | 1  | 2   | 7.65   | 8.0  | 2.16 | 2.53E-03 |
| Q9NRP4     | Succinate dehydrogenase assembly factor 3, mitochondrial OS=Homo sapiens GN=SDHAF3 PE=1 SV=1 - [SDHF3_HUMAN]                         | 16    | 2  | 2   | 14.64  | 9.1  | 2.17 | 8.93E-04 |

|        |                                                                                                                                                                  |       |    |    |       |     |      |          |
|--------|------------------------------------------------------------------------------------------------------------------------------------------------------------------|-------|----|----|-------|-----|------|----------|
| P54868 | Hydroxymethylglutaryl-CoA synthase, mitochondrial<br>OS=Homo sapiens GN=HMGCS2 PE=1 SV=1 -<br>[HMCS2_HUMAN]                                                      | 12.8  | 7  | 11 | 56.60 | 8.2 | 2.17 | 2.10E-03 |
| B3KVA7 | cDNA FLJ16309 fis, clone SKMUS2007816, highly similar<br>to Creatine kinase, sarcomeric mitochondrial (EC 2.7.3.2)<br>OS=Homo sapiens PE=2 SV=1 - [B3KVA7_HUMAN] | 35.67 | 8  | 24 | 40.45 | 7.4 | 2.17 | 7.81E-03 |
| T2D2V0 | MHC class II antigen (Fragment) OS=Homo sapiens<br>GN=HLA-DQB PE=4 SV=1 - [T2D2V0_HUMAN]                                                                         | 18.89 | 2  | 4  | 10.71 | 8.0 | 2.18 | 1.02E-03 |
| Q16822 | Phosphoenolpyruvate carboxykinase [GTP], mitochondrial<br>OS=Homo sapiens GN=PCK2 PE=1 SV=3 -<br>[PCKGM_HUMAN]                                                   | 35    | 1  | 31 | 70.68 | 7.6 | 2.18 | 4.48E-03 |
| D4IH33 | MHC class I antigen (Fragment) OS=Homo sapiens<br>GN=HLA-Cw PE=3 SV=1 - [D4IH33_HUMAN]                                                                           | 43.09 | 1  | 17 | 21.06 | 7.3 | 2.19 | 2.72E-03 |
| Q99470 | Stromal cell-derived factor 2 OS=Homo sapiens GN=SDF2<br>PE=1 SV=2 - [SDF2_HUMAN]                                                                                | 9.95  | 2  | 3  | 23.01 | 7.3 | 2.19 | 5.71E-04 |
| P23219 | Prostaglandin G/H synthase 1 OS=Homo sapiens<br>GN=PTGS1 PE=1 SV=2 - [PGH1_HUMAN]                                                                                | 22.87 | 12 | 22 | 68.64 | 7.2 | 2.20 | 2.92E-04 |
| Q8NFV4 | Protein ABHD11 OS=Homo sapiens GN=ABHD11 PE=1<br>SV=1 - [ABHDB_HUMAN]                                                                                            | 48.89 | 11 | 45 | 34.67 | 9.5 | 2.20 | 4.29E-04 |
| E3SWK8 | MHC class I antigen (Fragment) OS=Homo sapiens<br>GN=HLA-C PE=3 SV=1 - [E3SWK8_HUMAN]                                                                            | 53.04 | 1  | 15 | 21.12 | 7.4 | 2.21 | 2.77E-02 |
| Q9HC07 | Transmembrane protein 165 OS=Homo sapiens<br>GN=TMEM165 PE=1 SV=1 - [TM165_HUMAN]                                                                                | 21.3  | 3  | 5  | 34.88 | 7.0 | 2.22 | 1.23E-02 |
| P05787 | Keratin, type II cytoskeletal 8 OS=Homo sapiens GN=KRT8<br>PE=1 SV=7 - [K2C8_HUMAN]                                                                              | 48.86 | 21 | 73 | 53.67 | 5.6 | 2.23 | 2.73E-03 |



|            |                                                                                                                |       |    |    |        |      |      |          |
|------------|----------------------------------------------------------------------------------------------------------------|-------|----|----|--------|------|------|----------|
| P23378     | Glycine dehydrogenase (decarboxylating), mitochondrial OS=Homo sapiens GN=GLDC PE=1 SV=2 - [GCSP_HUMAN]        | 30    | 21 | 44 | 112.66 | 7.1  | 2.24 | 2.09E-03 |
| Q96SQ9     | Cytochrome P450 2S1 OS=Homo sapiens GN=CYP2S1 PE=1 SV=2 - [CP2S1_HUMAN]                                        | 17.26 | 6  | 9  | 55.78  | 8.6  | 2.24 | 1.56E-02 |
| A0A0U1RR89 | BAG family molecular chaperone regulator 1 (Fragment) OS=Homo sapiens GN=BAG1 PE=1 SV=1 - [A0A0U1RR89_HUMAN]   | 15.87 | 1  | 1  | 7.23   | 8.2  | 2.25 | 8.42E-03 |
| P16422     | Epithelial cell adhesion molecule OS=Homo sapiens GN=EPCAM PE=1 SV=2 - [EPCAM_HUMAN]                           | 24.84 | 5  | 7  | 34.91  | 7.5  | 2.25 | 7.53E-03 |
| A0A087WZU5 | Tetraspanin-6 OS=Homo sapiens GN=TSPAN6 PE=1 SV=1 - [A0A087WZU5_HUMAN]                                         | 24.82 | 3  | 4  | 15.60  | 6.3  | 2.25 | 1.33E-02 |
| Q9P270     | SLAIN motif-containing protein 2 OS=Homo sapiens GN=SLAIN2 PE=1 SV=2 - [SLAI2_HUMAN]                           | 1.03  | 1  | 1  | 62.51  | 9.5  | 2.27 | 7.50E-04 |
| O15235     | 28S ribosomal protein S12, mitochondrial OS=Homo sapiens GN=MRPS12 PE=1 SV=1 - [RT12_HUMAN]                    | 5.8   | 1  | 1  | 15.16  | 10.3 | 2.27 | 1.21E-03 |
| Q9Y446     | Plakophilin-3 OS=Homo sapiens GN=PKP3 PE=1 SV=1 - [PKP3_HUMAN]                                                 | 3.76  | 2  | 2  | 87.03  | 9.3  | 2.27 | 4.28E-03 |
| H0YBX3     | Protein RIDA (Fragment) OS=Homo sapiens GN=RIDA PE=1 SV=1 - [H0YBX3_HUMAN]                                     | 31.5  | 3  | 4  | 13.82  | 9.3  | 2.27 | 2.36E-03 |
| Q9NYJ1     | Cytochrome c oxidase assembly factor 4 homolog, mitochondrial OS=Homo sapiens GN=COA4 PE=1 SV=2 - [COA4_HUMAN] | 27.59 | 2  | 2  | 10.13  | 6.0  | 2.28 | 8.18E-03 |
| Q9HCB6     | Spondin-1 OS=Homo sapiens GN=SPON1 PE=1 SV=2 - [SPON1_HUMAN]                                                   | 34.08 | 21 | 38 | 90.91  | 6.1  | 2.28 | 5.63E-04 |

|            |                                                                                                                              |       |    |    |       |     |      |          |
|------------|------------------------------------------------------------------------------------------------------------------------------|-------|----|----|-------|-----|------|----------|
| A0A0B5E3E9 | Sodium-dependent phosphate transport protein 2B (Fragment) OS=Homo sapiens GN=SLC34A2 PE=2 SV=1 - [A0A0B5E3E9_HUMAN]         | 6.24  | 4  | 6  | 75.55 | 8.2 | 2.29 | 2.90E-04 |
| Q96C01     | Protein FAM136A OS=Homo sapiens GN=FAM136A PE=1 SV=1 - [F136A_HUMAN]                                                         | 31.16 | 4  | 10 | 15.63 | 7.6 | 2.30 | 3.06E-04 |
| R4GNF9     | Thiosulfate sulfurtransferase/rhodanese-like domain-containing protein 1 OS=Homo sapiens GN=TSTD1 PE=1 SV=1 - [R4GNF9_HUMAN] | 50    | 3  | 5  | 7.05  | 7.2 | 2.31 | 4.38E-04 |
| P08729     | Keratin, type II cytoskeletal 7 OS=Homo sapiens GN=KRT7 PE=1 SV=5 - [K2C7_HUMAN]                                             | 27.72 | 11 | 34 | 51.35 | 5.5 | 2.32 | 2.84E-04 |
| H0YMJ4     | Kinesin-like protein KIF23 OS=Homo sapiens GN=KIF23 PE=1 SV=2 - [H0YMJ4_HUMAN]                                               | 16.51 | 1  | 2  | 12.36 | 9.3 | 2.34 | 3.26E-03 |
| Q92876     | Kallikrein-6 OS=Homo sapiens GN=KLK6 PE=1 SV=1 - [KLK6_HUMAN]                                                                | 4.51  | 1  | 1  | 26.84 | 7.4 | 2.36 | 1.13E-02 |
| P56277     | Cx9C motif-containing protein 4 OS=Homo sapiens GN=CMC4 PE=1 SV=1 - [CMC4_HUMAN]                                             | 25    | 1  | 1  | 7.74  | 8.2 | 2.36 | 7.17E-03 |
| Q9NXQ7     | cDNA FLJ20106 fis, clone COL04830 OS=Homo sapiens PE=2 SV=1 - [Q9NXQ7_HUMAN]                                                 | 3.66  | 1  | 1  | 31.76 | 9.3 | 2.37 | 4.32E-03 |
| P50591     | Tumor necrosis factor ligand superfamily member 10 OS=Homo sapiens GN=TNFSF10 PE=1 SV=1 - [TNF10_HUMAN]                      | 4.27  | 1  | 1  | 32.49 | 7.4 | 2.38 | 9.73E-03 |
| Q16880     | 2-hydroxyacylsphingosine 1-beta-galactosyltransferase OS=Homo sapiens GN=UGT8 PE=2 SV=2 - [CGT_HUMAN]                        | 5.91  | 3  | 3  | 61.40 | 9.5 | 2.38 | 1.06E-02 |
| Q9NXW2     | DnaJ homolog subfamily B member 12 OS=Homo sapiens GN=DNAJB12 PE=1 SV=4 - [DJB12_HUMAN]                                      | 7.47  | 3  | 3  | 41.79 | 8.5 | 2.40 | 3.07E-03 |

|        |                                                                                                      |       |   |    |       |     |      |          |
|--------|------------------------------------------------------------------------------------------------------|-------|---|----|-------|-----|------|----------|
| P09758 | Tumor-associated calcium signal transducer 2 OS=Homo sapiens GN=TACSTD2 PE=1 SV=3 - [TACD2_HUMAN]    | 26.63 | 7 | 10 | 35.69 | 8.9 | 2.41 | 1.12E-03 |
| C9JQ41 | Coiled-coil domain-containing protein 58 OS=Homo sapiens GN=CCDC58 PE=1 SV=1 - [C9JQ41_HUMAN]        | 27.69 | 3 | 7  | 15.29 | 8.9 | 2.42 | 1.40E-03 |
| C9JFR7 | Cytochrome c (Fragment) OS=Homo sapiens GN=CYCS PE=1 SV=1 - [C9JFR7_HUMAN]                           | 57.43 | 6 | 42 | 11.33 | 9.7 | 2.43 | 1.11E-03 |
| P29373 | Cellular retinoic acid-binding protein 2 OS=Homo sapiens GN=CRABP2 PE=1 SV=2 - [RABP2_HUMAN]         | 23.91 | 3 | 5  | 15.68 | 5.4 | 2.46 | 6.13E-04 |
| P55145 | Mesencephalic astrocyte-derived neurotrophic factor OS=Homo sapiens GN=MANF PE=1 SV=3 - [MANF_HUMAN] | 42.31 | 8 | 23 | 20.69 | 8.7 | 2.48 | 2.87E-03 |
| Q6P1M0 | Long-chain fatty acid transport protein 4 OS=Homo sapiens GN=SLC27A4 PE=1 SV=1 - [S27A4_HUMAN]       | 11.66 | 5 | 19 | 72.02 | 8.5 | 2.51 | 8.46E-03 |
| A5Y5A3 | PC1/MRPS28 fusion protein OS=Homo sapiens PE=2 SV=1 - [A5Y5A3_HUMAN]                                 | 12.95 | 2 | 6  | 31.16 | 6.2 | 2.52 | 7.25E-03 |
| Q9UBX3 | Mitochondrial dicarboxylate carrier OS=Homo sapiens GN=SLC25A10 PE=1 SV=2 - [DIC_HUMAN]              | 34.49 | 1 | 12 | 31.26 | 9.5 | 2.54 | 1.06E-02 |
| Q96CP7 | Calfacilitin OS=Homo sapiens GN=TLCD1 PE=2 SV=1 - [TLCD1_HUMAN]                                      | 3.24  | 1 | 1  | 28.53 | 9.5 | 2.57 | 6.85E-03 |
| Q5JTJ3 | Cytochrome c oxidase assembly factor 6 homolog OS=Homo sapiens GN=COA6 PE=1 SV=1 - [COA6_HUMAN]      | 32    | 3 | 6  | 14.11 | 8.3 | 2.59 | 4.68E-03 |
| P82932 | 28S ribosomal protein S6, mitochondrial OS=Homo sapiens GN=MRPS6 PE=1 SV=3 - [RT06_HUMAN]            | 39.2  | 5 | 11 | 14.22 | 9.3 | 2.59 | 1.33E-03 |

|        |                                                                                                                                                          |       |   |    |        |     |      |          |
|--------|----------------------------------------------------------------------------------------------------------------------------------------------------------|-------|---|----|--------|-----|------|----------|
| H3BTQ8 | Kunitz-type protease inhibitor 1 (Fragment) OS=Homo sapiens GN=SPINT1 PE=1 SV=8 - [H3BTQ8_HUMAN]                                                         | 2.66  | 1 | 1  | 33.15  | 6.2 | 2.63 | 2.42E-03 |
| F8WAX7 | Selenoprotein K OS=Homo sapiens GN=SELK PE=1 SV=1 - [F8WAX7_HUMAN]                                                                                       | 12.5  | 1 | 1  | 8.29   | 9.8 | 2.64 | 4.78E-02 |
| B3KY44 | Solute carrier family 11 (Proton-coupled divalent metal ion transporters), member 2, isoform CRA_c OS=Homo sapiens GN=SLC11A2 PE=2 SV=1 - [B3KY44_HUMAN] | 2.68  | 1 | 1  | 44.86  | 7.6 | 2.67 | 4.89E-02 |
| D0W033 | MHC class I antigen (Fragment) OS=Homo sapiens GN=HLA-A PE=3 SV=1 - [D0W033_HUMAN]                                                                       | 37.73 | 1 | 12 | 31.57  | 5.9 | 2.69 | 4.15E-03 |
| P09110 | 3-ketoacyl-CoA thiolase, peroxisomal OS=Homo sapiens GN=ACAA1 PE=1 SV=2 - [THIK_HUMAN]                                                                   | 46.23 | 4 | 50 | 44.26  | 8.4 | 2.70 | 1.00E-02 |
| H7C4E5 | Cytochrome c oxidase copper chaperone (Fragment) OS=Homo sapiens GN=COX17 PE=1 SV=1 - [H7C4E5_HUMAN]                                                     | 12.07 | 1 | 1  | 6.41   | 7.7 | 2.75 | 2.33E-03 |
| Q8NDA2 | Hemicentin-2 OS=Homo sapiens GN=HMCN2 PE=2 SV=3 - [HMCN2_HUMAN]                                                                                          | 0.51  | 1 | 1  | 541.64 | 5.9 | 2.77 | 2.44E-02 |
| J3KQF5 | Cytosolic carboxypeptidase 4 OS=Homo sapiens GN=AGBL1 PE=1 SV=2 - [J3KQF5_HUMAN]                                                                         | 2.23  | 1 | 1  | 116.11 | 7.1 | 2.80 | 2.39E-02 |
| Q05639 | Elongation factor 1-alpha 2 OS=Homo sapiens GN=EEF1A2 PE=1 SV=1 - [EF1A2_HUMAN]                                                                          | 23.76 | 2 | 46 | 50.44  | 9.0 | 2.83 | 3.67E-04 |
| Q9BTP0 | Protein Wnt (Fragment) OS=Homo sapiens PE=2 SV=1 - [Q9BTP0_HUMAN]                                                                                        | 2.73  | 1 | 1  | 32.33  | 9.0 | 2.84 | 4.53E-03 |
| Q7Z7D3 | V-set domain-containing T-cell activation inhibitor 1 OS=Homo sapiens GN=VTCN1 PE=1 SV=1 - [VTCN1_HUMAN]                                                 | 6.74  | 2 | 3  | 30.86  | 5.3 | 2.84 | 3.10E-03 |

|            |                                                                                                                                                |       |   |    |       |      |      |          |
|------------|------------------------------------------------------------------------------------------------------------------------------------------------|-------|---|----|-------|------|------|----------|
| A0A090N8E5 | Similar to OG-2 homeodomain protein-like similar to U65067 (PID:g1575526) OS=Homo sapiens GN=LOC135935 PE=4 SV=1 - [A0A090N8E5_HUMAN]          | 6.33  | 1 | 1  | 52.71 | 7.9  | 2.90 | 6.88E-03 |
| A0A1B0GTN5 | Protein LOC101929926 (Fragment) OS=Homo sapiens GN=LOC101929926 PE=4 SV=1 - [A0A1B0GTN5_HUMAN]                                                 | 13.1  | 1 | 2  | 9.31  | 11.5 | 2.91 | 1.30E-02 |
| A0A140VJV6 | Testicular tissue protein Li 183 OS=Homo sapiens PE=2 SV=1 - [A0A140VJV6_HUMAN]                                                                | 13.85 | 1 | 4  | 21.81 | 8.4  | 3.29 | 5.81E-04 |
| R9RV30     | Androgen-induced 1/Golgi SNAP receptor complex member 1 variant 1 fusion protein (Fragment) OS=Homo sapiens GN=AIG1 PE=2 SV=1 - [R9RV30_HUMAN] | 11.25 | 1 | 3  | 9.00  | 8.9  | 3.33 | 2.47E-02 |
| A8MZH8     | Pituitary tumor-transforming gene 1 protein-interacting protein OS=Homo sapiens GN=PTTG1IP PE=1 SV=1 - [A8MZH8_HUMAN]                          | 23.36 | 2 | 5  | 11.59 | 8.1  | 3.37 | 3.70E-03 |
| Q9HCY8     | Protein S100-A14 OS=Homo sapiens GN=S100A14 PE=1 SV=1 - [S10AE_HUMAN]                                                                          | 27.88 | 3 | 6  | 11.65 | 5.2  | 3.38 | 1.70E-03 |
| Q9BSE5     | Agmatinase, mitochondrial OS=Homo sapiens GN=AGMAT PE=1 SV=2 - [SPEB_HUMAN]                                                                    | 11.36 | 2 | 3  | 37.64 | 7.6  | 3.40 | 7.42E-04 |
| Q9C002     | Normal mucosa of esophagus-specific gene 1 protein OS=Homo sapiens GN=NMES1 PE=2 SV=1 - [NMES1_HUMAN]                                          | 51.81 | 4 | 10 | 9.61  | 9.5  | 3.46 | 3.35E-04 |
| O60635     | Tetraspanin-1 OS=Homo sapiens GN=TSPAN1 PE=1 SV=2 - [TSN1_HUMAN]                                                                               | 5.39  | 1 | 1  | 26.28 | 5.2  | 3.47 | 2.43E-03 |
| H0YN27     | Protein-glutamine gamma-glutamyltransferase K (Fragment) OS=Homo sapiens GN=TGM1 PE=1 SV=1 - [H0YN27_HUMAN]                                    | 9.63  | 1 | 1  | 14.48 | 7.2  | 3.49 | 7.37E-05 |
| Q67AU1     | MHC class II antigen (Fragment) OS=Homo sapiens GN=HLA-DPA1 PE=4 SV=1 - [Q67AU1_HUMAN]                                                         | 31.18 | 1 | 4  | 10.84 | 5.1  | 3.58 | 6.74E-03 |

|            |                                                                                                  |       |   |    |       |     |      |          |
|------------|--------------------------------------------------------------------------------------------------|-------|---|----|-------|-----|------|----------|
| H7C0U6     | Uncharacterized protein C1orf53 (Fragment) OS=Homo sapiens GN=C1orf53 PE=1 SV=1 - [H7C0U6_HUMAN] | 10.98 | 1 | 1  | 8.78  | 8.6 | 3.72 | 3.35E-03 |
| A0A0K0KRA3 | MHC class I antigen (Fragment) OS=Homo sapiens GN=HLA-A PE=3 SV=1 - [A0A0K0KRA3_HUMAN]           | 47.51 | 1 | 11 | 21.19 | 7.0 | 4.12 | 5.31E-04 |

---
